# Supplementary material for: Risk‐Attributable Burden of Ischemic Heart Disease in 137 Low‐ and Middle‐Income Countries From 2000 to 2019
Source: PubMed Central journal article supplement — J Am Heart Assoc. 2021 Sep 29;10(19):e021024. doi: 10.1161/JAHA.121.021024 (PMC8649139; doi:10.1161/jaha.121.021024), 2021-09-29

# **SUPPLEMENTAL MATERIAL**

The GBD 2019 capstone papers and their respective online appendices documented the general methods, data sources, model selection information, performance and limitation information for the GBD 2019 analyses. This study is in compliance with the Guidelines for Accurate and Transparent Health Estimates Reporting (GATHER) recommendations. These materials provided details requested by the GATHER statement. A GATHER checklist is presented in this appendix (Data S1). This appendix provides more methodological details for the PAF calculation (Data S2). Data S3 and Data S4 present supplemental tables and figure of the manuscript.

## CONTENT

### **Data S1 GATHER CHECKLIST**

### **Data S2 METHODOLOGICAL DETAILS OF PAF CALCULATION**

### **Data S3 TABLES**

#### **TABLELEGENDS**

**Table S1.** Definitions of 27 individual risk factors of IHD and theoretical minimum risk exposure level

**Table S2.** 137 LMICs as per World Bank Classification

**Table S3.** Age-standardized risk-attributable mortality rates (1/100,000) for IHD by region and year in globe and LMICs, 2000–2019

**Table S4.** Age-standardized risk-attributable DALY rates (1/100,000) for IHD by region and year in globe and eLMICs, 2000–2019

**Table S5.** PAF for IHD DALYs attributable to all modifiable risk factors by country in LMICs in 2019

**Table S6.** Age-standardized death rate (1/100,000) and percentage change for IHD by country in LMICs from 2000 to 2019

**Table S7.** Age-standardized DALY rate (1/100,000) and percentage change for IHD by country in LMICs from 2000 to 2019

**Table S8.** PAF for IHD Deaths and DALYs attributable to all modifiable risk factors by region and sex in 2019

**Table S9.** PAF for IHD death by age in LMICs in 2019

**Table S10.** PAF for IHD DALY by age in LMICs in 2019

**Table S11.** Male to female ratio in IHD age-standardized death rate attributable to all modifiable risk

factors by region and year in globe and LMICs, 2000–2019

**Table S12.** Male to female ratio in IHD age-standardized DALY rate attributable to all modifiable risk factors by region and year in globe and LMICs, 2000–2019

**Table S13.** PAF of IHD deaths by age and sex in low income countries in 2019

**Table S14.** PAF of IHD deaths by age and sex in lower-middle income countries in 2019

**Table S15.** PAF of IHD deaths by age and sex in upper-middle income countries in 2019

**Table S16.** PAF of IHD DALYs by age and sex in low-income countries in 2019

**Table S17.** PAF of IHD DALYs by age and sex in lower-middle income countries in 2019

**Table S18.** PAF of IHD DALYs by age and sex in upper-middle income countries in 2019

**Table S19.** PAF of IHD DALYs for modifiable risk factors in 31 low-income countries in 2019

**Table S20.** PAF of IHD DALYs for modifiable risk factors in 47 lower-middle income countries in 2019

**Table S21.** PAF of IHD DALYs for modifiable risk factors in 59 upper-middle income countries in 2019

**Table S22.** PAF of IHD death for modifiable risk factors by sex in LMICs in 2019

**Table S23.** PAF of IHD DALY for modifiable risk factors by sex in LMICs in 2019

**Table S24.** Risk-attributable IHD deaths with percentage change by age and sex in LMICs from 2000 to 2019

**Table S25.** Risk-attributable IHD DALY with percentage change by age and sex in LMICs from 2000 to 2019

## **Data S4 FIGURES**

### **FIGURELEGENDS**

**Figure S1.** Simplified flowchart for the estimation of risk-attributable IHD burden



## Data S1. GATHER CHECKLIST.

### Guidelines for Accurate and Transparent Health Estimates Reporting: the GATHER Statement

| Item #                                                                                      | Checklist item                                                                                                                        | Reported on page #                                                                                                                                                                                                                                                                                                                                                                                                                                                                                                                                                                                |
|---------------------------------------------------------------------------------------------|---------------------------------------------------------------------------------------------------------------------------------------|---------------------------------------------------------------------------------------------------------------------------------------------------------------------------------------------------------------------------------------------------------------------------------------------------------------------------------------------------------------------------------------------------------------------------------------------------------------------------------------------------------------------------------------------------------------------------------------------------|
| <b>Objectives and funding</b>                                                               |                                                                                                                                       |                                                                                                                                                                                                                                                                                                                                                                                                                                                                                                                                                                                                   |
| 1                                                                                           | Define the indicator(s), populations (including age, sex, and geographic entities), and time period(s) for which estimates were made. | Range of the estimation was stated in the last paragraph of the Introduction (Page 5). Main indicators were described in the Methods section (Page 5-9).                                                                                                                                                                                                                                                                                                                                                                                                                                          |
| 2                                                                                           | List the funding sources for the work.                                                                                                | See funding sources section of the manuscript (Page 25).                                                                                                                                                                                                                                                                                                                                                                                                                                                                                                                                          |
| <b>Data inputs</b>                                                                          |                                                                                                                                       |                                                                                                                                                                                                                                                                                                                                                                                                                                                                                                                                                                                                   |
| <i>For all data inputs from multiple sources that are synthesised as part of the study:</i> |                                                                                                                                       |                                                                                                                                                                                                                                                                                                                                                                                                                                                                                                                                                                                                   |
| 3                                                                                           | Describe how the data were identified and how the data were accessed.                                                                 | <p>The 2019 GBD study developed new approaches to better estimate the exposure to risk factors by integrating all accessible data from multiple epidemiological studies in various countries. These studies included up-dated high-quality meta-analyses, randomized controlled trials, cohort studies, case-control studies, and other observational studies.</p> <p>Narrative description of data seeking methodology in GBD 2019 was provided in previously published appendices:</p> <p>1.GBD 2019 Demographics Collaborators. Global age-sex-specific fertility, mortality, healthy life</p> |

|   |                                                                                             |                                                                                                                                                                                                                                                                                                                                                                                                                                                                                                                                                                                                                                                                                                                                                                                                                           |
|---|---------------------------------------------------------------------------------------------|---------------------------------------------------------------------------------------------------------------------------------------------------------------------------------------------------------------------------------------------------------------------------------------------------------------------------------------------------------------------------------------------------------------------------------------------------------------------------------------------------------------------------------------------------------------------------------------------------------------------------------------------------------------------------------------------------------------------------------------------------------------------------------------------------------------------------|
|   |                                                                                             | <p>expectancy (HALE), and population estimates in 204 countries and territories, 1950–2019: a comprehensive demographic analysis for the Global Burden of Disease Study 2019. Lancet. 2020;396:(10258):1160-1203.</p> <p>2.GBD 2019 Diseases and Injuries Collaborators. Global burden of 369 diseases and injuries in 204 countries and territories, 1990-2019: a systematic analysis for the Global Burden of Disease Study 2019. Lancet. 2020;396:(10258):1204-1222.</p> <p>3.GBD 2019 Risk Factors Collaborators. Global burden of 87 risk factors in 204 countries and territories, 1990-2019: a systematic analysis for the Global Burden of Disease Study 2019. Lancet. 2020;396(10258):1223-1249.</p> <p>In particular, all data provided in this present study were available to the public.</p>                 |
| 4 | <p>Specify the inclusion and exclusion criteria.</p> <p>Identify all ad-hoc exclusions.</p> | <p>The 2019 GBD study integrated all accessible data from multiple epidemiological studies in various countries. These studies included up-dated high-quality meta-analyses, randomized controlled trials, cohort studies, case-control studies, and other observational studies.</p> <p>Of note, all data provided in this present study were available to the public.</p> <p>Narrative about inclusion and exclusion criteria by data type was provided in previously published appendices:</p> <p>1.GBD 2019 Demographics Collaborators. Global age-sex-specific fertility, mortality, healthy life expectancy (HALE), and population estimates in 204 countries and territories, 1950–2019: a comprehensive demographic analysis for the Global Burden of Disease Study 2019. Lancet. 2020;396:(10258):1160-1203.</p> |

|   |                                                                                                                                                                                                                                                                                                                                                  |                                                                                                                                                                                                                                                                                                                                                                                                                                                                                                                                                                                    |
|---|--------------------------------------------------------------------------------------------------------------------------------------------------------------------------------------------------------------------------------------------------------------------------------------------------------------------------------------------------|------------------------------------------------------------------------------------------------------------------------------------------------------------------------------------------------------------------------------------------------------------------------------------------------------------------------------------------------------------------------------------------------------------------------------------------------------------------------------------------------------------------------------------------------------------------------------------|
|   |                                                                                                                                                                                                                                                                                                                                                  | <p>2.GBD 2019 Diseases and Injuries Collaborators. Global burden of 369 diseases and injuries in 204 countries and territories, 1990-2019: a systematic analysis for the Global Burden of Disease Study 2019. Lancet. 2020;396:(10258):1204-1222.</p> <p>3.GBD 2019 Risk Factors Collaborators. Global burden of 87 risk factors in 204 countries and territories, 1990-2019: a systematic analysis for the Global Burden of Disease Study 2019. Lancet. 2020;396(10258):1223-1249.</p>                                                                                            |
| 5 | Provide information about all included data sources and their main characteristics. For each data source used, report reference information or contact name/institution, population represented, data collection method, year(s) of data collection, sex and age range, diagnostic criteria or measurement method, and sample size, as relevant. | <p>GBD study team provided an online data source tool that provides metadata for data sources by component, geography, cause, risk, or impairment. The tool can be accessed on the following website: <a href="http://ghdx.healthdata.org/gbd-2019/data-input-sources">http://ghdx.healthdata.org/gbd-2019/data-input-sources</a>.</p> <p>Data sources section in the Methods part of the manuscript also described the main data source for the present study.</p>                                                                                                                |
| 6 | Identify and describe any categories of input data that have potentially important biases (eg, based on characteristics listed in item 5).                                                                                                                                                                                                       | <p>IHD were identified with standard case definitions. IHD represented acute myocardial infarction, chronic stable angina, chronic IHD, and heart failure due to IHD.</p> <p>Main text and previous publications summarized the known biases by cause:</p> <p>1.GBD 2019 Demographics Collaborators. Global age-sex-specific fertility, mortality, healthy life expectancy (HALE), and population estimates in 204 countries and territories, 1950–2019: a comprehensive demographic analysis for the Global Burden of Disease Study 2019. Lancet. 2020;396:(10258):1160-1203.</p> |



|                                                                                                       |                                                                                                                                                                                                                                                                                                         |                                                                                                                                                                                                                                                                                                                                                                                                                                                                                                                                             |
|-------------------------------------------------------------------------------------------------------|---------------------------------------------------------------------------------------------------------------------------------------------------------------------------------------------------------------------------------------------------------------------------------------------------------|---------------------------------------------------------------------------------------------------------------------------------------------------------------------------------------------------------------------------------------------------------------------------------------------------------------------------------------------------------------------------------------------------------------------------------------------------------------------------------------------------------------------------------------------|
|                                                                                                       |                                                                                                                                                                                                                                                                                                         | <p>2.GBD 2019 Diseases and Injuries Collaborators. Global burden of 369 diseases and injuries in 204 countries and territories, 1990-2019: a systematic analysis for the Global Burden of Disease Study 2019. Lancet. 2020;396:(10258):1204-1222.</p> <p>3.GBD 2019 Risk Factors Collaborators. Global burden of 87 risk factors in 204 countries and territories, 1990-2019: a systematic analysis for the Global Burden of Disease Study 2019. Lancet. 2020;396(10258):1223-1249.</p>                                                     |
| <i>For data inputs that contribute to the analysis but were not synthesised as part of the study:</i> |                                                                                                                                                                                                                                                                                                         |                                                                                                                                                                                                                                                                                                                                                                                                                                                                                                                                             |
| 7                                                                                                     | Describe and give sources for any other data inputs.                                                                                                                                                                                                                                                    | The online data source tool provides the list of all data sources:<br><a href="http://ghdx.healthdata.org/gbd-2019/data-input-sources">http://ghdx.healthdata.org/gbd-2019/data-input-sources</a>                                                                                                                                                                                                                                                                                                                                           |
| <i>For all data inputs:</i>                                                                           |                                                                                                                                                                                                                                                                                                         |                                                                                                                                                                                                                                                                                                                                                                                                                                                                                                                                             |
| 8                                                                                                     | Provide all data inputs in a file format from which data can be efficiently extracted (eg, a spreadsheet rather than a PDF), including all relevant meta-data listed in item 5. For any data inputs that cannot be shared because of ethical or legal reasons, such as third-party ownership, provide a | <p>Downloads of input data will be available through online tools, including data visualization tools and data query tools: <a href="http://www.healthdata.org/results/data-visualizations">http://www.healthdata.org/results/data-visualizations</a>;<br/><a href="http://ghdx.healthdata.org/">http://ghdx.healthdata.org/</a>; <a href="http://ghdx.healthdata.org/gbd-data-tool">http://ghdx.healthdata.org/gbd-data-tool</a>.</p> <p>In particular, all input data are currently available in tools, which are open to the public.</p> |

|                      |                                                                                      |                                                                                                                                                                                                                                                                                                                                                                                                                                                                                                                                                                                                                                                                                                                                                                                                                                                                                                                                                                                                                                                                                                                                                                                                                                                                                                                                                                                                                                                                                                                                                                                                                                                     |
|----------------------|--------------------------------------------------------------------------------------|-----------------------------------------------------------------------------------------------------------------------------------------------------------------------------------------------------------------------------------------------------------------------------------------------------------------------------------------------------------------------------------------------------------------------------------------------------------------------------------------------------------------------------------------------------------------------------------------------------------------------------------------------------------------------------------------------------------------------------------------------------------------------------------------------------------------------------------------------------------------------------------------------------------------------------------------------------------------------------------------------------------------------------------------------------------------------------------------------------------------------------------------------------------------------------------------------------------------------------------------------------------------------------------------------------------------------------------------------------------------------------------------------------------------------------------------------------------------------------------------------------------------------------------------------------------------------------------------------------------------------------------------------------|
|                      | contact name or the name of the institution that retains the right to the data.      |                                                                                                                                                                                                                                                                                                                                                                                                                                                                                                                                                                                                                                                                                                                                                                                                                                                                                                                                                                                                                                                                                                                                                                                                                                                                                                                                                                                                                                                                                                                                                                                                                                                     |
| <b>Data analysis</b> |                                                                                      |                                                                                                                                                                                                                                                                                                                                                                                                                                                                                                                                                                                                                                                                                                                                                                                                                                                                                                                                                                                                                                                                                                                                                                                                                                                                                                                                                                                                                                                                                                                                                                                                                                                     |
| 9                    | Provide a conceptual overview of the data analysis method. A diagram may be helpful. | <p>In the GBD study, the Bayesian meta-regression model DisMod-MR 2.1 was used as the main method to estimate the prevalence of non-fatal diseases, and the Cause of Death Ensemble Model (CODEm) was used to appraise cause-specific mortality. To explore potential trends of specific risk factors, improved spatiotemporal Gaussian process regression was applied to synthesize all available data. DALY is the sum of YLD which is based on cause-specific prevalence and disability weight, and YLL due to premature mortality, which is calculated by multiplying age-sex-specific deaths by global standard life expectancy. To characterize the temporal trends across regions and countries, age-standardized rates (per 100,000) were computed using the global age-standard population constructed by the World Health Organization.</p> <p>Flow diagrams of the overall methodological processes, as well as cause-specific modelling processes have been provided in previously published appendices:</p> <ol style="list-style-type: none"> <li>1.GBD 2019 Demographics Collaborators. Global age-sex-specific fertility, mortality, healthy life expectancy (HALE), and population estimates in 204 countries and territories, 1950–2019: a comprehensive demographic analysis for the Global Burden of Disease Study 2019. Lancet. 2020;396:(10258):1160-1203.</li> <li>2.GBD 2019 Diseases and Injuries Collaborators. Global burden of 369 diseases and injuries in 204 countries and territories, 1990-2019: a systematic analysis for the Global Burden of Disease Study 2019. Lancet. 2020;396:(10258):1204-1222.</li> </ol> |

|           |                                                                                                                                                                                                                                                                                |                                                                                                                                                                                                                                                                                                                                                                                                                                                                                                                                                                                                                                                                                                                                                                                                                                                                                                                                                                                                                                                                                                                                                                                                                                                                                                                                                                                                                                                                                                                                                               |
|-----------|--------------------------------------------------------------------------------------------------------------------------------------------------------------------------------------------------------------------------------------------------------------------------------|---------------------------------------------------------------------------------------------------------------------------------------------------------------------------------------------------------------------------------------------------------------------------------------------------------------------------------------------------------------------------------------------------------------------------------------------------------------------------------------------------------------------------------------------------------------------------------------------------------------------------------------------------------------------------------------------------------------------------------------------------------------------------------------------------------------------------------------------------------------------------------------------------------------------------------------------------------------------------------------------------------------------------------------------------------------------------------------------------------------------------------------------------------------------------------------------------------------------------------------------------------------------------------------------------------------------------------------------------------------------------------------------------------------------------------------------------------------------------------------------------------------------------------------------------------------|
|           |                                                                                                                                                                                                                                                                                | <p>3.GBD 2019 Risk Factors Collaborators. Global burden of 87 risk factors in 204 countries and territories, 1990-2019: a systematic analysis for the Global Burden of Disease Study 2019. Lancet. 2020;396(10258):1223-1249.</p>                                                                                                                                                                                                                                                                                                                                                                                                                                                                                                                                                                                                                                                                                                                                                                                                                                                                                                                                                                                                                                                                                                                                                                                                                                                                                                                             |
| <p>10</p> | <p>Provide a detailed description of all steps of the analysis, including mathematical formulae. This description should cover, as relevant, data cleaning, data pre-processing, data adjustments and weighting of data sources, and mathematical or statistical model(s).</p> | <p>Causes of death that should not be identified as underlying causes of death but have been recorded as the underlying cause of death on death certificates, also known as garbage codes, were redistributed to appropriate the International Classification of Disease (ICD)-10 codes prior to modeling. A Bayesian meta-regression tool was used to estimate prevalence for each cause and the distribution for severity of its sequelae; regression models were used to adjust data that did not follow the standard definition for each cause in the direction of case definition-based data. To explore potential trends of specific risk factors, improved spatiotemporal Gaussian process regression was applied to synthesize all available data.</p> <p>Mortality was estimated by using vital registration data coded to ICD system or household mortality surveys known as verbal autopsy. Years lived with disability for a specific cause was calculated by multiplying its prevalence with the corresponding disability weights, which have been estimated in several previous worldwide surveys. Years of life lost was calculated by multiplying observed deaths for a specific age by global agespecific reference life expectancy. Disability-adjusted life-years for any corresponding subpopulation of a specific cause was the sum of the corresponding YLDs and YLLs.</p> <p>Further etailed descriptions of all steps of the analysis were included in the methodological approaches sections of previously published appendices:</p> |

|    |                                                                                        |                                                                                                                                                                                                                                                                                                                                                                                                                                                                                                                                                                                                                                                                                                                                                                                                                                                                                                                                                                                                 |
|----|----------------------------------------------------------------------------------------|-------------------------------------------------------------------------------------------------------------------------------------------------------------------------------------------------------------------------------------------------------------------------------------------------------------------------------------------------------------------------------------------------------------------------------------------------------------------------------------------------------------------------------------------------------------------------------------------------------------------------------------------------------------------------------------------------------------------------------------------------------------------------------------------------------------------------------------------------------------------------------------------------------------------------------------------------------------------------------------------------|
|    |                                                                                        | <p>1.GBD 2019 Demographics Collaborators. Global age-sex-specific fertility, mortality, healthy life expectancy (HALE), and population estimates in 204 countries and territories, 1950–2019: a comprehensive demographic analysis for the Global Burden of Disease Study 2019. Lancet. 2020;396:(10258):1160-1203.</p> <p>2.GBD 2019 Diseases and Injuries Collaborators. Global burden of 369 diseases and injuries in 204 countries and territories, 1990-2019: a systematic analysis for the Global Burden of Disease Study 2019. Lancet. 2020;396:(10258):1204-1222.</p> <p>3.GBD 2019 Risk Factors Collaborators. Global burden of 87 risk factors in 204 countries and territories, 1990-2019: a systematic analysis for the Global Burden of Disease Study 2019. Lancet. 2020;396(10258):1223-1249.</p>                                                                                                                                                                                 |
| 11 | Describe how candidate models were evaluated and how the final model(s) were selected. | <p>The Bayesian meta-regression model DisMod-MR 2.1 was used as the main method to estimate the prevalence of non-fatal diseases, and the Cause of Death Ensemble Model (CODEm) was used to appraise cause-specific mortality. To explore potential trends of specific risk factors, improved spatiotemporal Gaussian process regression was applied to synthesize all available data.</p> <p>These details were provided in previously published appendices:</p> <p>1.GBD 2019 Demographics Collaborators. Global age-sex-specific fertility, mortality, healthy life expectancy (HALE), and population estimates in 204 countries and territories, 1950–2019: a comprehensive demographic analysis for the Global Burden of Disease Study 2019. Lancet. 2020;396:(10258):1160-1203.</p> <p>2.GBD 2019 Diseases and Injuries Collaborators. Global burden of 369 diseases and injuries in 204 countries and territories, 1990-2019: a systematic analysis for the Global Burden of Disease</p> |

|    |                                                                                                                                                                        |                                                                                                                                                                                                                                                                                                                                                                                                                                                                                                                                                                                                                                                                                                                                                                                                                                                                                              |
|----|------------------------------------------------------------------------------------------------------------------------------------------------------------------------|----------------------------------------------------------------------------------------------------------------------------------------------------------------------------------------------------------------------------------------------------------------------------------------------------------------------------------------------------------------------------------------------------------------------------------------------------------------------------------------------------------------------------------------------------------------------------------------------------------------------------------------------------------------------------------------------------------------------------------------------------------------------------------------------------------------------------------------------------------------------------------------------|
|    |                                                                                                                                                                        | <p>Study 2019. Lancet. 2020;396:(10258):1204-1222.</p> <p>3.GBD 2019 Risk Factors Collaborators. Global burden of 87 risk factors in 204 countries and territories, 1990-2019: a systematic analysis for the Global Burden of Disease Study 2019. Lancet. 2020;396(10258):1223-1249.</p>                                                                                                                                                                                                                                                                                                                                                                                                                                                                                                                                                                                                     |
| 12 | <p>Provide the results of an evaluation of model performance, if done, as well as the results of any relevant sensitivity analysis.</p>                                | <p>This information was provided in the previously published appendices:</p> <p>1.GBD 2019 Demographics Collaborators. Global age-sex-specific fertility, mortality, healthy life expectancy (HALE), and population estimates in 204 countries and territories, 1950–2019: a comprehensive demographic analysis for the Global Burden of Disease Study 2019. Lancet. 2020;396:(10258):1160-1203.</p> <p>2.GBD 2019 Diseases and Injuries Collaborators. Global burden of 369 diseases and injuries in 204 countries and territories, 1990-2019: a systematic analysis for the Global Burden of Disease Study 2019. Lancet. 2020;396:(10258):1204-1222.</p> <p>3.GBD 2019 Risk Factors Collaborators. Global burden of 87 risk factors in 204 countries and territories, 1990-2019: a systematic analysis for the Global Burden of Disease Study 2019. Lancet. 2020;396(10258):1223-1249.</p> |
| 13 | <p>Describe methods of calculating uncertainty of the estimates. State which sources of uncertainty were, and were not, accounted for in the uncertainty analysis.</p> | <p>The GBD 2019 study allowed for the production of estimates with uncertainty intervals (UIs) for all locations in every year, even when data were sparse or missing. The 95% UIs reported for each estimate used 1,000 draws from the posterior distribution of models, reported as the 2.5th and 97.5th values of the distribution.</p> <p>These details were provided in the methodological write-ups of previously published appendices:</p>                                                                                                                                                                                                                                                                                                                                                                                                                                            |

|                               |                                                                                                        |                                                                                                                                                                                                                                                                                                                                                                                                                                                                                                                                                                                                                                                                                                                                                                                                                 |
|-------------------------------|--------------------------------------------------------------------------------------------------------|-----------------------------------------------------------------------------------------------------------------------------------------------------------------------------------------------------------------------------------------------------------------------------------------------------------------------------------------------------------------------------------------------------------------------------------------------------------------------------------------------------------------------------------------------------------------------------------------------------------------------------------------------------------------------------------------------------------------------------------------------------------------------------------------------------------------|
|                               |                                                                                                        | <p>1.GBD 2019 Demographics Collaborators. Global age-sex-specific fertility, mortality, healthy life expectancy (HALE), and population estimates in 204 countries and territories, 1950–2019: a comprehensive demographic analysis for the Global Burden of Disease Study 2019. Lancet. 2020;396:(10258):1160-1203.</p> <p>2.GBD 2019 Diseases and Injuries Collaborators. Global burden of 369 diseases and injuries in 204 countries and territories, 1990-2019: a systematic analysis for the Global Burden of Disease Study 2019. Lancet. 2020;396:(10258):1204-1222.</p> <p>3.GBD 2019 Risk Factors Collaborators. Global burden of 87 risk factors in 204 countries and territories, 1990-2019: a systematic analysis for the Global Burden of Disease Study 2019. Lancet. 2020;396(10258):1223-1249.</p> |
| 14                            | State how analytical or statistical source code used to generate estimates can be accessed.            | Analysis code can be download on the the official website of the GBD study:<br><a href="http://ghdx.healthdata.org/gbd-2019/code">http://ghdx.healthdata.org/gbd-2019/code</a>                                                                                                                                                                                                                                                                                                                                                                                                                                                                                                                                                                                                                                  |
| <b>Results and discussion</b> |                                                                                                        |                                                                                                                                                                                                                                                                                                                                                                                                                                                                                                                                                                                                                                                                                                                                                                                                                 |
| 15                            | Provide published estimates in a file format from which data can be efficiently extracted.             | GBD 2019 results are available through online data visualization tools, the Global Health Data Exchange, and the online data query tool:<br><a href="http://www.healthdata.org/results/data-visualizations">http://www.healthdata.org/results/data-visualizations</a> ; <a href="http://ghdx.healthdata.org/">http://ghdx.healthdata.org/</a> ;<br><a href="http://ghdx.healthdata.org/gbd-data-tool">http://ghdx.healthdata.org/gbd-data-tool</a>                                                                                                                                                                                                                                                                                                                                                              |
| 16                            | Report a quantitative measure of the uncertainty of the estimates (eg, uncertainty intervals).         | Uncertainty intervals are provided with results.                                                                                                                                                                                                                                                                                                                                                                                                                                                                                                                                                                                                                                                                                                                                                                |
| 17                            | Interpret results in light of existing evidence. If updating a previous set of estimates, describe the | The detailed interpretation of results was stated in the Discussion Section (Page 17~24).                                                                                                                                                                                                                                                                                                                                                                                                                                                                                                                                                                                                                                                                                                                       |

|    |                                                                                                                                                          |                                                                                                                                                                                                                                                                                                                                                                                                                                                                                                                                                                                                                                                                                                                                                                                                                                                                                                                                                                              |
|----|----------------------------------------------------------------------------------------------------------------------------------------------------------|------------------------------------------------------------------------------------------------------------------------------------------------------------------------------------------------------------------------------------------------------------------------------------------------------------------------------------------------------------------------------------------------------------------------------------------------------------------------------------------------------------------------------------------------------------------------------------------------------------------------------------------------------------------------------------------------------------------------------------------------------------------------------------------------------------------------------------------------------------------------------------------------------------------------------------------------------------------------------|
|    | reasons for changes in estimates.                                                                                                                        |                                                                                                                                                                                                                                                                                                                                                                                                                                                                                                                                                                                                                                                                                                                                                                                                                                                                                                                                                                              |
| 18 | Discuss limitations of the estimates. Include a discussion of any modelling assumptions or data limitations that affect interpretation of the estimates. | First, the correlation between attributed prevalence and deaths for IHD brings uncertainties to the calculation of YLD and YLL, which leads to decreased precision of attributed DALYs. Second, even though our analysis of IHD burden was conducted using regionally and nationally representative data, we failed to examine sub-national discrepancies with available data, which underscores the need to undertake more specific assessments at the state, province, county, urban, or rural level in future studies. Third, with improvements in early diagnostic techniques over the past two decades, inconsistencies in diagnostic criteria for IHD over time may cause measurement errors in the data acquisition process. Fourth, even though the TMREL estimates were discussed and approved by international risk factor epidemiologists, evidence of TMREL selection was uncertain for some risk factors, particularly in LICs with limited risk exposure data. |

## Data S2. METHODOLOGICAL DETAILS OF PAF CALCULATION.

### A. Categorical variables

With respect to categorical variables (e.g., smoking and second-hand smoke), formula (1) was applied

to explain the proportion of exposure to risk factors that can be avoided:

$$(1) PAF = \frac{\sum_{i=1}^n P_i (RR_i - 1)}{\sum_{i=1}^n P_i (RR_i - 1) + 1},$$

where  $RR_i$  is relative risk for risk factor  $i$ ,  $P_i$  is the observed distribution of exposure to modifiable risk factors  $i$  in a given population, and  $n$  is the total number of exposure categories.

### B. Continuous variables

For continuous variables (e.g., ambient particulate matter pollution, high systolic blood pressure, and high LDL cholesterol), formula (2) was introduced to calculate PAFs:

$$(2) PAF = \frac{\int_{x=0}^m RR(x)P(x)dx - \int_{x=0}^m RR(x)P'(x)dx}{\int_{x=0}^m RR(x)P(x)dx},$$

where  $RR(x)$  is the relative risk at level  $x$ ,  $P(x)$  is the observed distribution of exposure to risk factors in a given population,  $P'(x)$  is the expected distribution of exposure at TMREL in a counterfactual scenario, and  $m$  is the maximum level for exposure.



### C. Joint action with independent risk factors

For independent risk factors, a multiplicative aggregation of PAFs was calculated by formula

$$(3) \ PAF = 1 - \prod_{i=1}^n (1 - PAF_i),$$

where  $PAF_i$  is the proportion for each individual risk factor  $i$ ,  $(1 - PAF_i)$  is the proportion that cannot be attributed to any modifiable risks, and  $n$  is the total number of risk factors.

### D. Joint action with mediated risk factors

Since the effect of an individual risk factor (e.g., diet high in sodium) on IHD can be mediated through the intermediate one (e.g., high blood pressure), we used formula (4) to estimate the joint PAFs of combined effects of behavioral, environmental, and metabolic risk clusters:

$$(4) \ PAF = 1 - \prod_{i=1}^n (1 - PAF_i \prod_{j=1}^n (1 - MF_{ij})),$$

where  $n$  is the sum of aggregated risk factors;  $PAF_i$  is the proportion for risk  $i$ , and  $MF_{ij}$  is the mediation factor of risk  $i$  mediated through  $j$ . Mediation risk factors for IHD are shown in the table below.

| <b>Risk Factor</b>                      | <b>Mediator</b>              | <b>Mediation Factor</b> |
|-----------------------------------------|------------------------------|-------------------------|
| Lead exposure in bone                   | High systolic blood pressure | 1.00 (1.00 to 1.00)     |
| Diet low in fruits                      | High LDL cholesterol         | 0.06 (0.05 to 0.08)     |
| Diet low in fruits                      | High systolic blood pressure | 0.06 (0.05 to 0.08)     |
| Diet low in vegetables                  | High fasting plasma glucose  | 0.06 (0.01 to 0.02)     |
| Diet low in vegetables                  | High LDL cholesterol         | 0.04 (0.03 to 0.05)     |
| Diet low in vegetables                  | High systolic blood pressure | 0.04 (0.03 to 0.05)     |
| Diet low in whole grains                | High LDL cholesterol         | 0.39 (0.17 to 0.54)     |
| Diet low in nuts and seeds              | High fasting plasma glucose  | 0.03 (0.02 to 0.06)     |
| Diet low in nuts and seeds              | High LDL cholesterol         | 0.28 (0.01 to 1.62)     |
| Diet low in nuts and seeds              | High systolic blood pressure | 0.34 (0.24 to 0.47)     |
| Diet high in processed meat             | High fasting plasma glucose  | 0.01 (0.01 to 0.02)     |
| Diet high in sugar-sweetened beverages  | High fasting plasma glucose  | 0.15 (0.1 to 0.2)       |
| Diet high in sugar-sweetened beverages  | High LDL cholesterol         | 0.10 (0.05 to 0.15)     |
| Diet high in sugar-sweetened beverages  | High systolic blood pressure | 0.31 (0.28 to 0.34)     |
| Diet high in sugar-sweetened beverages  | High body-mass index         | 1.00 (1.00 to 1.00)     |
| Diet low in fibre                       | Diet low in fruits           | 1.00 (1.00 to 1.00)     |
| Diet low in fibre                       | Diet low in vegetables       | 1.00 (1.00 to 1.00)     |
| Diet low in fibre                       | Diet low in whole grains     | 1.00 (1.00 to 1.00)     |
| Diet low in seafood omega-3 fatty acids | High systolic blood pressure | 0.01 (0 to 0.02)        |
| Diet low in polyunsaturated fatty acids | High fasting plasma glucose  | 0.57 (0.39 to 0.77)     |
| Diet low in polyunsaturated fatty acids | High systolic blood pressure | 0.72 (0.57 to 0.89)     |
| Diet high in trans fatty acids          | High LDL cholesterol         | 0.15 (0.02 to 0.24)     |
| Diet high in trans fatty acids          | High systolic blood pressure | 0.15 (0.02 to 0.24)     |
| Diet high in sodium                     | High systolic blood pressure | 1.00 (1.00 to 1.00)     |
| Low physical activity                   | High fasting plasma glucose  | 0.14 (0.11 to 0.18)     |
| High fasting plasma glucose             | High LDL cholesterol         | 0.04 (0.02 to 0.05)     |

|                             |                              |                     |
|-----------------------------|------------------------------|---------------------|
| High fasting plasma glucose | High systolic blood pressure | 0.1 (0.08 to 0.11)  |
| High LDL cholesterol        | High systolic blood pressure | 0.09 (0.07 to 0.11) |
| High body-mass index        | High fasting plasma glucose  | 0.15 (0.10 to 0.20) |
| High body-mass index        | High LDL cholesterol         | 0.10 (0.05 to 0.15) |
| High body-mass index        | High systolic blood pressure | 0.31 (0.28 to 0.34) |

**Mediation risk factors for IHD\***

\* IHD: ischemic heart disease

For IHD, all available cohorts and estimated relative risks with and without adjustment across all combinations of metabolic risk factors were pooled. The excess attenuated risk for each mediation-risk-cause set was then computed.

**Table S1. Definitions of 27 individual risk factors of IHD\* and theoretical minimum risk exposure level**

| Individual risk factors                  | Exposure definition                                                                                                                                                                    | Theoretical minimum risk exposure level                                                                                                                                                                                                                                                                                                                                   |
|------------------------------------------|----------------------------------------------------------------------------------------------------------------------------------------------------------------------------------------|---------------------------------------------------------------------------------------------------------------------------------------------------------------------------------------------------------------------------------------------------------------------------------------------------------------------------------------------------------------------------|
| Ambient particulate matter pollution     | Annual average daily exposure to outdoor air concentrations of particulate matter with an aerodynamic diameter of $\leq 2.5 \mu\text{m}$ (PM2.5), measured in $\mu\text{g}/\text{m}^3$ | Joint theoretical minimum risk exposure level for both household and ambient particulate matter pollution is a uniform distribution between 2.4 and $5.9 \mu\text{g}/\text{m}^3$ , with burden attributed proportionally between household and particulate matter pollution on the basis of source of PM2.5 exposure in excess of theoretical minimum risk exposure level |
| Household air pollution from solid fuels | Individual exposure to PM2.5 due to use of solid cooking fuel                                                                                                                          | See ambient particulate matter pollution                                                                                                                                                                                                                                                                                                                                  |
| High temperature                         | exposure to temperatures warmer than this TMREL                                                                                                                                        | The temperature that is associated with the lowest overall mortality attributable to the risk in a given location and year                                                                                                                                                                                                                                                |
| Low temperature                          | temperatures colder than this TMREL.                                                                                                                                                   | The temperature that is associated with the lowest overall mortality attributable to the risk in a given location and year                                                                                                                                                                                                                                                |
| Lead exposure                            | Blood lead levels in $\mu\text{g}/\text{dL}$ of blood, bone lead levels in $\mu\text{g}/\text{g}$ of bone                                                                              | 2 $\mu\text{g}/\text{dL}$ , corresponding to lead levels in pre-industrial humans as natural sources of lead prevent the feasibility of zero exposure                                                                                                                                                                                                                     |
| Smoking                                  | Prevalence of current use of any smoked tobacco                                                                                                                                        | All individuals are lifelong non-smokers                                                                                                                                                                                                                                                                                                                                  |

---

|                        |                                                                                                                                                                                                                                        |                                             |
|------------------------|----------------------------------------------------------------------------------------------------------------------------------------------------------------------------------------------------------------------------------------|---------------------------------------------|
|                        | product and prevalence of former use of any smoked tobacco product; among current smokers, cigarette equivalents smoked per smoker per day and cumulative pack-years of exposure; among former smokers, number of years since quitting |                                             |
| Second-hand smoke      | Average daily exposure to air particulate matter from second-hand smoke with an aerodynamic diameter smaller than 2.5 µg, measured in µg/m <sup>3</sup> , among non-smokers                                                            | No second-hand smoke exposure               |
| Alcohol use            | Average daily alcohol consumption of pure alcohol (measured in g per day) in current drinkers who had consumed alcohol during the past 12 months                                                                                       | Estimated distribution 0–10 g per day       |
| Diet low in fruits     | Average daily consumption of fruits (fresh, frozen, cooked, canned, or dried, excluding fruit juices and salted or pickled fruits)                                                                                                     | Consumption of fruit 200–300 g per day      |
| Diet low in vegetables | Average daily consumption of vegetables (fresh, frozen, cooked, canned, or dried, excluding legumes and salted or pickled vegetables, juices, nuts and seeds, and starchy vegetables such as potatoes or corn)                         | Consumption of vegetables 290–430 g per day |
| Diet low in legumes    | Average daily consumption of legumes (fresh,                                                                                                                                                                                           | Consumption of legumes 50–70 g              |

---

---

|                                         |                                                                                                                                                                                                         |                                                                              |
|-----------------------------------------|---------------------------------------------------------------------------------------------------------------------------------------------------------------------------------------------------------|------------------------------------------------------------------------------|
|                                         | frozen, cooked, canned, or dried legumes)                                                                                                                                                               | per day                                                                      |
| Diet low in whole grains                | Average daily consumption of whole grains (bran, germ, and endosperm in their natural proportion) from breakfast cereals, bread, rice, pasta, biscuits, muffins, tortillas, pancakes, and other sources | Consumption of whole grains<br>100–150 g per day                             |
| Diet low in nuts and seeds              | Average daily consumption of nut and seed foods                                                                                                                                                         | Consumption of nuts and seeds<br>16–25 g per day                             |
| Diet high in processed meat             | Average daily consumption of meat preserved by smoking, curing, salting, or addition of chemical preservatives                                                                                          | Consumption of processed meat 0–4 g<br>per day                               |
| Diet high in sugar-sweetened beverages  | Average daily consumption of beverages with $\geq 50$ kcal per 226.8 g serving                                                                                                                          | Consumption of sugar-sweetened<br>beverages 0–5 g per day                    |
| Diet low in fibre                       | Average daily intake of fibre from all sources including fruits, vegetables, grains, legumes, and pulses                                                                                                | Consumption of fibre 19–28 g per day                                         |
| Diet low in seafood omega 3 fatty acids | Average daily intake of eicosapentaenoic acid and docosahexaenoic acid                                                                                                                                  | Consumption of seafood omega 3 fatty<br>acids 200–300 mg per day             |
| Diet low in polyunsaturated fatty acids | Average daily intake of omega 6 fatty acids from all sources, mainly liquid vegetable oils, including soybean oil, corn oil, and safflower oil                                                          | Consumption of polyunsaturated fatty<br>acids as 9–13% of total daily energy |

---

---

|                                          |                                                                                                                                           |                                                                |
|------------------------------------------|-------------------------------------------------------------------------------------------------------------------------------------------|----------------------------------------------------------------|
| Diet high in trans fatty acids           | Average daily intake of trans fat from all sources, mainly partially hydrogenated vegetable oils and ruminant products                    | Consumption of trans fatty acids as 0–1% of total daily energy |
| Diet high in sodium                      | 24-h urinary sodium measured in g per day                                                                                                 | 24-h urinary sodium 1–5 g per day                              |
| Diet high in red meat                    | Any intake (in grams per day) of red meat including beef, pork, lamb, and goat but excluding poultry, fish, eggs, and all processed meats |                                                                |
| Low physical activity                    | Average weekly physical activity at work, home, transport-related and recreational measured by MET min per week                           | All adults experience 3000–4500 MET min per week               |
| High fasting plasma glucose              | Serum fasting plasma glucose measured in mmol/L                                                                                           | 4.8–5.4 mmol/L                                                 |
| High low-density lipoprotein cholesterol | Serum low-density lipoprotein, measured in mmol/L                                                                                         | 0.7–1.3 mmol/L                                                 |
| High systolic blood pressure             | Systolic blood pressure, measured in mm Hg                                                                                                | 110–115 mm Hg                                                  |
| High body-mass index                     | Body-mass index, measured in kg/m <sup>2</sup>                                                                                            | 20–25 kg/m <sup>2</sup>                                        |
| Impaired kidney function                 | Proportion of the population with ACR >30 mg/g or GFR <60 mL/min/1.73 m <sup>2</sup> , excluding end-stage renal disease                  | GFR >60 mL/min/1.73 m <sup>2</sup> and ACR <30 mg/g            |

---

\* IHD: ischemic heart disease

**Table S2. 137 LMICs\* as per World Bank Classification**

| <b>World Bank income level</b> | <b>Number</b> | <b>Countries</b>                                                                                                                                                                                                                                                                                                                                                                                                                                                                                                                                                                                                                                                                                           |
|--------------------------------|---------------|------------------------------------------------------------------------------------------------------------------------------------------------------------------------------------------------------------------------------------------------------------------------------------------------------------------------------------------------------------------------------------------------------------------------------------------------------------------------------------------------------------------------------------------------------------------------------------------------------------------------------------------------------------------------------------------------------------|
| Low income countries           | 31            | Democratic People's Republic of Korea, Tajikistan, Haiti, Syrian Arab Republic, Yemen, Afghanistan, Nepal, Central African Republic, Democratic Republic of the Congo, Burundi, Eritrea, Ethiopia, Madagascar, Malawi, Mozambique, Rwanda, Somalia, United Republic of Tanzania, Uganda, Benin, Burkina Faso, Chad, Gambia, Guinea, Guinea-Bissau, Liberia, Mali, Niger, Sierra Leone, Togo, South Sudan                                                                                                                                                                                                                                                                                                   |
| Lower-middle income countries  | 47            | Cambodia, Indonesia, Lao People's Democratic Republic, Myanmar, Philippines, Timor-Leste, Viet Nam, Kiribati, Micronesia (Federated States of), Papua New Guinea, Solomon Islands, Vanuatu, Kyrgyzstan, Mongolia, Uzbekistan, Republic of Moldova, Ukraine, Bolivia (Plurinational State of), El Salvador, Honduras, Nicaragua, Egypt, Morocco, Palestine, Tunisia, Bangladesh, Bhutan, India, Pakistan, Angola, Congo, Comoros, Djibouti, Kenya, Zambia, Lesotho, Eswatini, Zimbabwe, Cameroon, Cabo Verde, Côte d'Ivoire, Ghana, Mauritania, Nigeria, Sao Tome and Principe, Senegal, Sudan                                                                                                              |
| Upper-middle income countries  | 59            | China, Malaysia, Maldives, Sri Lanka, Thailand, Fiji, Marshall Islands, Samoa, Tonga, Armenia, Azerbaijan, Georgia, Kazakhstan, Turkmenistan, Albania, Bosnia and Herzegovina, Bulgaria, North Macedonia, Montenegro, Romania, Serbia, Belarus, Russian Federation, Argentina, Belize, Cuba, Dominica, Dominican Republic, Grenada, Guyana, Jamaica, Saint Lucia, Saint Vincent and the Grenadines, Suriname, Ecuador, Peru, Colombia, Costa Rica, Guatemala, Mexico, Venezuela (Bolivarian Republic of), Brazil, Paraguay, Algeria, Iran (Islamic Republic of), Iraq, Jordan, Lebanon, Libya, Turkey, Equatorial Guinea, Gabon, Mauritius, Botswana, Namibia, South Africa, American Samoa, Nauru, Tuvalu |

\* LMICs: low- and middle-income countries



**Table S3. Age-standardized risk-attributable mortality rates (1/100,000) for IHD<sup>1</sup> by region and year in globe and LMICs<sup>2</sup>, 2000–2019**

| year | Low-income Countries |             |             | Lower-middle Countries |             |             | Upper-middle Countries |             |             | Globe |             |             |
|------|----------------------|-------------|-------------|------------------------|-------------|-------------|------------------------|-------------|-------------|-------|-------------|-------------|
|      | value                | lower limit | upper limit | value                  | lower limit | upper limit | value                  | lower limit | upper limit | value | lower limit | upper limit |
| 2000 | 117.5                | 104.4       | 131.5       | 182.3                  | 171.0       | 193.2       | 141.6                  | 131.7       | 148.8       | 140.3 | 131.0       | 147.4       |
| 2001 | 117.2                | 104.0       | 130.9       | 182.3                  | 170.7       | 192.8       | 141.8                  | 132.0       | 149.4       | 138.8 | 129.0       | 145.5       |
| 2002 | 117.2                | 104.1       | 130.9       | 182.7                  | 171.4       | 193.2       | 143.7                  | 133.6       | 151.4       | 138.3 | 128.3       | 145.0       |
| 2003 | 117.1                | 103.8       | 131.1       | 180.9                  | 169.7       | 191.8       | 144.3                  | 134.8       | 152.0       | 136.9 | 127.3       | 144.3       |
| 2004 | 117.2                | 103.7       | 131.4       | 176.1                  | 164.5       | 187.0       | 142.7                  | 132.5       | 150.4       | 133.2 | 123.7       | 140.3       |
| 2005 | 116.8                | 102.9       | 131.3       | 176.2                  | 164.6       | 186.5       | 142.5                  | 132.9       | 150.7       | 132.0 | 122.1       | 139.2       |
| 2006 | 116.5                | 102.5       | 130.9       | 176.4                  | 165.0       | 186.8       | 137.4                  | 127.5       | 145.4       | 128.7 | 119.7       | 136.1       |
| 2007 | 116.0                | 101.9       | 130.7       | 176.7                  | 165.0       | 187.5       | 134.3                  | 123.8       | 142.5       | 126.4 | 117.1       | 133.7       |
| 2008 | 116.0                | 101.6       | 130.5       | 177.0                  | 165.9       | 188.3       | 134.2                  | 123.7       | 142.1       | 125.4 | 116.2       | 132.8       |
| 2009 | 115.7                | 101.0       | 130.2       | 172.3                  | 161.0       | 182.4       | 133.6                  | 123.0       | 142.0       | 123.0 | 113.8       | 130.2       |
| 2010 | 115.0                | 100.3       | 129.8       | 169.7                  | 158.6       | 180.4       | 134.5                  | 123.8       | 143.1       | 121.9 | 113.0       | 128.9       |
| 2011 | 114.8                | 99.9        | 129.8       | 167.8                  | 156.4       | 178.6       | 132.1                  | 120.5       | 140.4       | 120.2 | 110.5       | 127.1       |

|      |       |      |       |       |       |       |       |       |       |       |       |       |
|------|-------|------|-------|-------|-------|-------|-------|-------|-------|-------|-------|-------|
| 2012 | 114.3 | 99.1 | 129.4 | 167.0 | 156.0 | 177.2 | 128.9 | 118.6 | 137.4 | 118.4 | 109.7 | 125.3 |
| 2013 | 113.4 | 98.4 | 128.5 | 167.0 | 156.0 | 177.4 | 126.9 | 115.7 | 135.1 | 116.9 | 107.8 | 123.8 |
| 2014 | 112.3 | 97.1 | 127.6 | 164.2 | 152.4 | 174.3 | 125.2 | 115.1 | 134.0 | 114.9 | 106.0 | 121.5 |
| 2015 | 112.2 | 96.6 | 128.1 | 164.4 | 152.8 | 174.4 | 122.9 | 112.1 | 131.8 | 114.3 | 105.6 | 121.1 |
| 2016 | 111.4 | 95.7 | 127.7 | 161.3 | 149.5 | 172.1 | 121.0 | 109.9 | 130.0 | 112.7 | 104.0 | 119.6 |
| 2017 | 111.1 | 95.1 | 127.6 | 159.2 | 145.9 | 171.1 | 118.3 | 107.3 | 127.5 | 111.1 | 101.6 | 118.5 |
| 2018 | 111.1 | 95.1 | 127.9 | 159.4 | 144.8 | 172.7 | 116.3 | 104.7 | 126.2 | 110.6 | 100.7 | 118.5 |
| 2019 | 110.8 | 94.9 | 127.7 | 157.5 | 142.1 | 171.7 | 115.1 | 102.8 | 125.4 | 110.0 | 99.9  | 118.0 |

\* LMICs: low- and middle-income countries

<sup>†</sup>IHD: ischemic heart disease

**Table S4. Age-standardized risk-attributable DALY\* rates (1/100,000) for IHD<sup>†</sup> by region and year in globe and LMICs<sup>‡</sup>, 2000–2019**

| year | Low-income |             |             | Lower-middle |             |             | Upper-middle |             |             | Globe  |             |             |
|------|------------|-------------|-------------|--------------|-------------|-------------|--------------|-------------|-------------|--------|-------------|-------------|
|      | Countries  |             |             | Countries    |             |             | Countries    |             |             |        |             |             |
|      | value      | lower limit | upper limit | value        | lower limit | upper limit | value        | lower limit | upper limit | value  | lower limit | upper limit |
| 2000 | 2392.5     | 2132.8      | 2678.3      | 3593.5       | 3403.0      | 3789.6      | 2615.9       | 2500.6      | 2719.0      | 2671.5 | 2558.2      | 2771.8      |
| 2001 | 2382.5     | 2124.3      | 2659.4      | 3593.2       | 3406.7      | 3774.3      | 2614.4       | 2494.3      | 2721.9      | 2647.0 | 2537.5      | 2742.3      |
| 2002 | 2371.8     | 2121.0      | 2649.4      | 3600.2       | 3412.1      | 3787.5      | 2645.6       | 2517.9      | 2761.5      | 2641.3 | 2527.8      | 2743.0      |
| 2003 | 2364.9     | 2113.3      | 2638.3      | 3561.9       | 3386.0      | 3755.5      | 2654.7       | 2534.3      | 2768.9      | 2616.1 | 2505.3      | 2719.7      |
| 2004 | 2361.1     | 2109.7      | 2639.6      | 3471.0       | 3289.2      | 3662.7      | 2616.3       | 2491.4      | 2741.9      | 2549.7 | 2432.5      | 2660.9      |
| 2005 | 2345.7     | 2083.7      | 2627.2      | 3476.8       | 3294.4      | 3666.7      | 2605.8       | 2479.3      | 2735.9      | 2531.2 | 2413.7      | 2643.1      |
| 2006 | 2332.2     | 2067.2      | 2612.2      | 3486.3       | 3317.1      | 3671.5      | 2491.9       | 2370.0      | 2615.3      | 2470.1 | 2359.2      | 2577.7      |
| 2007 | 2318.2     | 2045.2      | 2595.5      | 3505.5       | 3335.1      | 3690.3      | 2418.2       | 2289.8      | 2549.1      | 2430.8 | 2316.3      | 2546.6      |
| 2008 | 2313.5     | 2036.3      | 2595.6      | 3514.7       | 3340.2      | 3713.0      | 2402.9       | 2279.9      | 2532.9      | 2413.0 | 2302.5      | 2528.0      |
| 2009 | 2302.1     | 2027.1      | 2591.4      | 3438.7       | 3259.6      | 3618.8      | 2369.8       | 2236.4      | 2502.1      | 2366.4 | 2255.4      | 2481.8      |
| 2010 | 2284.0     | 2003.1      | 2581.3      | 3413.1       | 3238.1      | 3601.0      | 2368.9       | 2239.8      | 2491.5      | 2348.1 | 2240.4      | 2454.8      |
| 2011 | 2275.8     | 1992.6      | 2565.4      | 3397.3       | 3206.0      | 3599.8      | 2311.7       | 2164.8      | 2450.8      | 2316.6 | 2195.5      | 2431.7      |

|      |        |        |        |        |        |        |        |        |        |        |        |        |
|------|--------|--------|--------|--------|--------|--------|--------|--------|--------|--------|--------|--------|
| 2012 | 2264.3 | 1984.6 | 2574.4 | 3389.6 | 3209.3 | 3576.2 | 2251.0 | 2116.3 | 2386.6 | 2284.9 | 2176.7 | 2393.1 |
| 2013 | 2242.8 | 1962.5 | 2549.7 | 3348.7 | 3173.4 | 3538.4 | 2210.5 | 2068.1 | 2339.8 | 2248.7 | 2133.3 | 2353.5 |
| 2014 | 2223.0 | 1931.0 | 2527.4 | 3272.1 | 3090.5 | 3451.2 | 2177.8 | 2045.0 | 2312.7 | 2206.2 | 2092.3 | 2310.3 |
| 2015 | 2218.5 | 1920.4 | 2535.7 | 3303.6 | 3130.2 | 3485.1 | 2135.4 | 1987.7 | 2276.7 | 2201.9 | 2094.5 | 2309.0 |
| 2016 | 2203.1 | 1899.1 | 2521.0 | 3258.2 | 3058.1 | 3453.9 | 2097.5 | 1949.5 | 2249.2 | 2174.7 | 2053.7 | 2288.4 |
| 2017 | 2193.7 | 1890.4 | 2526.5 | 3212.7 | 2999.5 | 3434.7 | 2049.0 | 1886.0 | 2200.7 | 2143.8 | 2016.0 | 2272.5 |
| 2018 | 2191.1 | 1875.6 | 2536.9 | 3196.6 | 2929.1 | 3467.7 | 2013.8 | 1844.1 | 2183.9 | 2129.9 | 1983.0 | 2269.0 |
| 2019 | 2180.0 | 1866.8 | 2523.2 | 3161.5 | 2868.6 | 3456.4 | 1991.8 | 1812.8 | 2162.7 | 2116.0 | 1971.1 | 2263.3 |

\* DALY: disability adjusted life years <sup>¶</sup>IHD: ischemic heart disease <sup>§</sup>LMICs: low- and middle-income countries

**Table S5. PAF\* for IHD<sup>§</sup> DALYs<sup>†</sup> attributable to all modifiable risk factors by country in 137 LMICs<sup>¶</sup> in 2019**

| Countries                             | value | lower limit | upper limit |
|---------------------------------------|-------|-------------|-------------|
| Democratic People's Republic of Korea | 93.2  | 91.0        | 95.1        |
| Tajikistan                            | 95.7  | 94.0        | 97.3        |
| Haiti                                 | 95.2  | 93.4        | 96.9        |
| Syrian Arab Republic                  | 95.4  | 94.0        | 96.8        |
| Yemen                                 | 95.8  | 94.4        | 97.1        |
| Afghanistan                           | 96.1  | 94.9        | 97.2        |
| Nepal                                 | 93.8  | 92.0        | 95.5        |
| Central African Republic              | 94.0  | 92.0        | 95.8        |
| Democratic Republic of the Congo      | 93.0  | 90.6        | 95.0        |
| Burundi                               | 91.1  | 88.6        | 93.2        |
| Eritrea                               | 91.1  | 88.4        | 93.5        |
| Ethiopia                              | 87.4  | 84.1        | 90.4        |
| Madagascar                            | 92.8  | 90.5        | 94.7        |
| Malawi                                | 92.6  | 90.3        | 94.7        |
| Mozambique                            | 93.2  | 91.0        | 95.1        |
| Rwanda                                | 89.8  | 86.7        | 92.6        |
| Somalia                               | 92.4  | 89.9        | 94.7        |
| United Republic of Tanzania           | 93.1  | 91.0        | 95.0        |
| Uganda                                | 89.5  | 86.8        | 92.3        |
| Benin                                 | 93.1  | 90.7        | 95.2        |
| Burkina Faso                          | 91.3  | 88.2        | 94.0        |
| Chad                                  | 93.2  | 90.9        | 95.1        |
| Gambia                                | 94.4  | 92.3        | 96.1        |

---

|                                  |      |      |      |
|----------------------------------|------|------|------|
| Guinea                           | 92.8 | 90.5 | 94.9 |
| Guinea-Bissau                    | 93.8 | 91.7 | 95.6 |
| Liberia                          | 94.4 | 92.3 | 96.1 |
| Mali                             | 92.5 | 89.9 | 94.7 |
| Niger                            | 92.5 | 89.7 | 94.8 |
| Sierra Leone                     | 93.8 | 91.8 | 95.5 |
| Togo                             | 94.1 | 92.2 | 95.8 |
| South Sudan                      | 91.9 | 89.3 | 94.2 |
| Cambodia                         | 93.7 | 91.6 | 95.7 |
| Indonesia                        | 95.1 | 93.5 | 96.4 |
| Lao People's Democratic Republic | 94.2 | 92.5 | 95.9 |
| Myanmar                          | 94.0 | 92.1 | 95.8 |
| Philippines                      | 93.7 | 91.9 | 95.3 |
| Timor-Leste                      | 93.4 | 91.3 | 95.3 |
| Viet Nam                         | 94.6 | 92.4 | 96.5 |
| Kiribati                         | 96.8 | 95.5 | 97.8 |
| Micronesia (Federated States of) | 96.3 | 94.7 | 97.7 |
| Papua New Guinea                 | 95.7 | 94.1 | 97.1 |
| Solomon Islands                  | 95.9 | 94.3 | 97.2 |
| Vanuatu                          | 96.8 | 95.5 | 97.9 |
| Kyrgyzstan                       | 93.6 | 91.3 | 95.6 |
| Mongolia                         | 97.1 | 96.1 | 98.0 |
| Uzbekistan                       | 96.2 | 94.6 | 97.6 |
| Republic of Moldova              | 94.6 | 92.2 | 96.7 |
| Ukraine                          | 94.0 | 91.5 | 96.3 |
| Bolivia (Plurinational State of) | 91.2 | 88.0 | 94.0 |
| El Salvador                      | 93.3 | 90.4 | 95.8 |

---

---

|                       |      |      |      |
|-----------------------|------|------|------|
| Honduras              | 94.9 | 92.8 | 96.9 |
| Nicaragua             | 93.8 | 91.4 | 96.1 |
| Egypt                 | 95.9 | 94.5 | 97.2 |
| Morocco               | 96.4 | 94.9 | 97.6 |
| Palestine             | 96.3 | 94.9 | 97.6 |
| Tunisia               | 95.6 | 93.7 | 97.3 |
| Bangladesh            | 94.0 | 92.2 | 95.7 |
| Bhutan                | 94.3 | 92.3 | 96.0 |
| India                 | 94.6 | 93.0 | 96.1 |
| Pakistan              | 95.2 | 93.8 | 96.5 |
| Angola                | 93.3 | 91.2 | 95.2 |
| Congo                 | 94.6 | 92.6 | 96.3 |
| Comoros               | 92.1 | 89.4 | 94.4 |
| Djibouti              | 93.9 | 91.7 | 95.6 |
| Kenya                 | 91.4 | 88.7 | 93.6 |
| Zambia                | 90.7 | 88.1 | 93.1 |
| Lesotho               | 94.2 | 92.1 | 96.1 |
| Eswatini              | 95.1 | 93.2 | 96.6 |
| Zimbabwe              | 95.4 | 93.6 | 96.9 |
| Cameroon              | 92.0 | 89.5 | 94.3 |
| Cabo Verde            | 93.9 | 91.1 | 96.3 |
| Côte d'Ivoire         | 94.6 | 92.7 | 96.3 |
| Ghana                 | 94.5 | 92.4 | 96.3 |
| Mauritania            | 94.6 | 92.6 | 96.2 |
| Nigeria               | 93.3 | 91.0 | 95.2 |
| Sao Tome and Principe | 93.9 | 91.5 | 96.0 |
| Senegal               | 94.7 | 92.8 | 96.4 |

---

---

|                        |      |      |      |
|------------------------|------|------|------|
| Sudan                  | 96.2 | 94.9 | 97.3 |
| China                  | 93.9 | 91.7 | 95.8 |
| Malaysia               | 96.5 | 95.0 | 97.7 |
| Maldives               | 95.0 | 93.1 | 96.8 |
| Sri Lanka              | 94.8 | 92.6 | 96.7 |
| Thailand               | 93.6 | 91.2 | 95.8 |
| Fiji                   | 97.0 | 95.8 | 98.0 |
| Marshall Islands       | 96.0 | 94.3 | 97.3 |
| Samoa                  | 96.1 | 94.5 | 97.5 |
| Tonga                  | 96.0 | 94.3 | 97.4 |
| Armenia                | 95.3 | 93.1 | 97.3 |
| Azerbaijan             | 95.8 | 94.0 | 97.4 |
| Georgia                | 95.7 | 93.6 | 97.5 |
| Kazakhstan             | 96.8 | 95.3 | 98.2 |
| Turkmenistan           | 96.3 | 94.8 | 97.6 |
| Albania                | 94.7 | 92.6 | 96.6 |
| Bosnia and Herzegovina | 96.2 | 94.1 | 97.9 |
| Bulgaria               | 95.1 | 92.6 | 97.2 |
| North Macedonia        | 96.6 | 94.8 | 98.1 |
| Montenegro             | 97.0 | 95.5 | 98.4 |
| Romania                | 95.3 | 93.0 | 97.3 |
| Serbia                 | 96.8 | 94.7 | 98.4 |
| Belarus                | 95.2 | 92.9 | 97.0 |
| Russian Federation     | 95.7 | 93.7 | 97.3 |
| Argentina              | 94.3 | 92.1 | 96.3 |
| Belize                 | 93.9 | 91.6 | 96.0 |
| Cuba                   | 92.7 | 89.7 | 95.3 |

---



---

|                                    |      |      |      |
|------------------------------------|------|------|------|
| Dominica                           | 93.4 | 90.4 | 96.1 |
| Dominican Republic                 | 93.4 | 91.0 | 95.6 |
| Grenada                            | 94.5 | 92.1 | 96.7 |
| Guyana                             | 94.7 | 92.4 | 96.7 |
| Jamaica                            | 93.8 | 91.1 | 96.2 |
| Saint Lucia                        | 94.3 | 91.7 | 96.6 |
| Saint Vincent and the Grenadines   | 93.3 | 90.3 | 95.9 |
| Suriname                           | 95.2 | 93.2 | 97.0 |
| Ecuador                            | 92.2 | 89.4 | 94.7 |
| Peru                               | 91.6 | 88.6 | 94.2 |
| Colombia                           | 93.3 | 90.3 | 95.8 |
| Costa Rica                         | 95.8 | 93.7 | 97.4 |
| Guatemala                          | 91.8 | 89.1 | 94.2 |
| Mexico                             | 94.6 | 92.6 | 96.5 |
| Venezuela (Bolivarian Republic of) | 95.3 | 93.3 | 97.1 |
| Brazil                             | 94.9 | 93.2 | 96.7 |
| Paraguay                           | 95.3 | 93.4 | 97.0 |
| Algeria                            | 95.9 | 94.2 | 97.3 |
| Iran (Islamic Republic of)         | 95.5 | 93.9 | 97.0 |
| Iraq                               | 97.4 | 96.4 | 98.2 |
| Jordan                             | 97.3 | 96.2 | 98.2 |
| Lebanon                            | 96.6 | 95.1 | 98.0 |
| Libya                              | 96.5 | 95.2 | 97.7 |
| Turkey                             | 94.9 | 93.0 | 96.8 |
| Equatorial Guinea                  | 93.3 | 90.9 | 95.5 |
| Gabon                              | 93.6 | 91.2 | 95.8 |
| Mauritius                          | 95.2 | 93.2 | 96.9 |

---

---

|                |      |      |      |
|----------------|------|------|------|
| Botswana       | 96.0 | 94.4 | 97.4 |
| Namibia        | 94.3 | 92.2 | 96.3 |
| South Africa   | 96.3 | 94.6 | 97.6 |
| American Samoa | 96.2 | 94.7 | 97.6 |
| Nauru          | 97.1 | 95.6 | 98.2 |
| Tuvalu         | 95.5 | 93.5 | 97.2 |

---

\* DALY: disability adjusted life years

§ IHD: ischemic heart disease

‡ PAF: population attributable fraction

¶ LMIC: low- and middle-income countries

**Table S6. Age-standardized death rate (1/100,000) and percentage change for IHD by country in 137 LMICs\* from 2000 to 2019**

|                                       | 2000  |             |             | 2019  |             |             | % of change, 2000-2019 |
|---------------------------------------|-------|-------------|-------------|-------|-------------|-------------|------------------------|
|                                       | value | lower limit | upper limit | value | lower limit | upper limit |                        |
| Democratic People's Republic of Korea | 112.1 | 89.4        | 133.9       | 115.5 | 96.9        | 136.8       | 3                      |
| Tajikistan                            | 317.3 | 284.1       | 347.5       | 410.2 | 349.0       | 479.8       | 29.3                   |
| Haiti                                 | 192.3 | 151.1       | 238.3       | 183.2 | 132.5       | 248.6       | -4.7                   |
| Syrian Arab Republic                  | 381.0 | 338.1       | 425.8       | 341.8 | 272.5       | 424.6       | -10.3                  |
| Yemen                                 | 303.5 | 244.9       | 373.5       | 279.2 | 230.5       | 353.6       | -8                     |
| Afghanistan                           | 394.1 | 315.8       | 478.2       | 307.3 | 241.8       | 369.1       | -22                    |
| Nepal                                 | 99.4  | 84.4        | 119.3       | 114.4 | 90.3        | 138.0       | 15                     |
| Central African Republic              | 133.7 | 99.2        | 172.8       | 136.4 | 101.3       | 181.5       | 2                      |
| Democratic Republic of the Congo      | 115.2 | 91.8        | 146.1       | 104.9 | 76.8        | 139.5       | -8.9                   |
| Burundi                               | 114.1 | 91.9        | 144.4       | 101.9 | 76.7        | 131.9       | -10.7                  |
| Eritrea                               | 89.5  | 67.4        | 114.6       | 100.9 | 79.4        | 126.1       | 12.7                   |
| Ethiopia                              | 86.3  | 70.0        | 102.8       | 71.9  | 52.5        | 91.3        | -16.6                  |
| Madagascar                            | 123.0 | 103.2       | 142.9       | 119.8 | 88.0        | 158.1       | -2.6                   |
| Malawi                                | 98.5  | 83.2        | 115.2       | 83.2  | 65.4        | 103.2       | -15.5                  |

|                             |       |       |       |       |       |       |       |
|-----------------------------|-------|-------|-------|-------|-------|-------|-------|
| Mozambique                  | 73.6  | 60.6  | 87.5  | 94.1  | 73.5  | 118.6 | 27.9  |
| Rwanda                      | 90.5  | 70.3  | 115.1 | 75.0  | 53.5  | 99.0  | -17.1 |
| Somalia                     | 100.3 | 74.2  | 130.1 | 114.7 | 86.0  | 153.1 | 14.4  |
| United Republic of Tanzania | 82.2  | 67.7  | 99.1  | 87.9  | 64.5  | 110.9 | 7     |
| Uganda                      | 89.5  | 65.9  | 111.5 | 78.0  | 53.5  | 98.4  | -12.9 |
| Benin                       | 110.2 | 93.5  | 128.6 | 104.1 | 84.6  | 128.0 | -5.6  |
| Burkina Faso                | 109.3 | 93.8  | 126.2 | 117.5 | 98.2  | 137.5 | 7.5   |
| Chad                        | 108.9 | 89.4  | 136.1 | 111.3 | 91.2  | 134.9 | 2.2   |
| Gambia                      | 121.1 | 99.5  | 143.9 | 141.3 | 116.5 | 169.3 | 16.7  |
| Guinea                      | 95.5  | 77.4  | 114.8 | 113.2 | 92.8  | 138.8 | 18.5  |
| Guinea-Bissau               | 147.3 | 122.7 | 180.6 | 152.9 | 121.6 | 189.7 | 3.8   |
| Liberia                     | 113.6 | 94.9  | 134.7 | 109.3 | 85.9  | 137.9 | -3.8  |
| Mali                        | 106.4 | 89.4  | 125.1 | 106.6 | 85.4  | 129.9 | 0.3   |
| Niger                       | 106.6 | 83.4  | 131.5 | 108.1 | 85.3  | 134.3 | 1.4   |
| Sierra Leone                | 126.6 | 98.9  | 158.8 | 124.4 | 95.5  | 159.0 | -1.7  |
| Togo                        | 129.1 | 106.6 | 153.5 | 124.9 | 102.3 | 154.4 | -3.2  |
| South Sudan                 | 73.0  | 56.1  | 92.3  | 76.1  | 53.7  | 100.8 | 4.2   |

|                                  |       |       |       |       |       |       |       |
|----------------------------------|-------|-------|-------|-------|-------|-------|-------|
| Cambodia                         | 111.1 | 93.5  | 133.5 | 109.2 | 89.0  | 129.8 | -1.7  |
| Indonesia                        | 119.0 | 107.6 | 130.6 | 131.4 | 112.1 | 146.2 | 10.5  |
| Lao People's Democratic Republic | 161.1 | 135.7 | 198.2 | 150.8 | 123.3 | 177.7 | -6.4  |
| Myanmar                          | 129.2 | 108.4 | 153.8 | 97.1  | 84.5  | 112.0 | -24.8 |
| Philippines                      | 123.8 | 111.3 | 134.9 | 136.3 | 113.1 | 158.8 | 10    |
| Timor-Leste                      | 105.2 | 82.9  | 129.9 | 145.3 | 111.0 | 178.9 | 38.1  |
| Viet Nam                         | 88.5  | 77.2  | 101.9 | 89.0  | 73.0  | 104.9 | 0.5   |
| Kiribati                         | 242.9 | 205.2 | 282.9 | 235.7 | 189.0 | 285.1 | -2.9  |
| Micronesia (Federated States of) | 248.7 | 201.5 | 308.3 | 267.4 | 199.2 | 341.2 | 7.5   |
| Papua New Guinea                 | 139.7 | 97.8  | 199.1 | 159.0 | 114.9 | 216.1 | 13.8  |
| Solomon Islands                  | 387.1 | 322.2 | 461.7 | 402.7 | 332.8 | 471.1 | 4     |
| Vanuatu                          | 276.3 | 219.0 | 348.0 | 290.6 | 229.3 | 372.6 | 5.2   |
| Kyrgyzstan                       | 288.5 | 265.7 | 305.1 | 291.9 | 256.0 | 325.8 | 1.2   |
| Mongolia                         | 475.0 | 412.3 | 535.1 | 294.8 | 243.7 | 356.1 | -37.9 |
| Uzbekistan                       | 553.4 | 522.7 | 578.5 | 660.4 | 588.5 | 734.1 | 19.3  |
| Republic of Moldova              | 388.5 | 359.4 | 407.5 | 246.7 | 215.0 | 279.4 | -36.5 |
| Ukraine                          | 440.3 | 413.8 | 460.3 | 392.9 | 340.3 | 449.9 | -10.8 |

|                                  |       |       |       |       |       |       |       |
|----------------------------------|-------|-------|-------|-------|-------|-------|-------|
| Bolivia (Plurinational State of) | 100.5 | 74.0  | 129.6 | 95.3  | 68.2  | 123.7 | -5.1  |
| El Salvador                      | 98.6  | 88.7  | 106.2 | 93.0  | 71.5  | 117.5 | -5.7  |
| Honduras                         | 130.0 | 102.4 | 169.2 | 144.6 | 118.9 | 176.1 | 11.3  |
| Nicaragua                        | 130.8 | 117.9 | 141.3 | 137.3 | 115.8 | 154.8 | 5     |
| Egypt                            | 335.4 | 306.5 | 369.5 | 340.3 | 265.8 | 422.9 | 1.4   |
| Morocco                          | 271.4 | 232.5 | 313.1 | 265.7 | 211.9 | 307.8 | -2.1  |
| Palestine                        | 252.4 | 225.7 | 279.8 | 196.7 | 171.1 | 225.1 | -22.1 |
| Tunisia                          | 224.8 | 184.9 | 265.2 | 182.2 | 138.4 | 232.1 | -19   |
| Bangladesh                       | 95.7  | 83.3  | 106.4 | 102.5 | 79.7  | 125.1 | 7.2   |
| Bhutan                           | 120.0 | 97.9  | 143.6 | 125.2 | 98.5  | 153.1 | 4.3   |
| India                            | 153.0 | 139.1 | 167.8 | 140.9 | 121.3 | 161.6 | -7.9  |
| Pakistan                         | 179.6 | 158.2 | 204.3 | 180.0 | 149.9 | 216.3 | 0.2   |
| Angola                           | 117.4 | 96.8  | 142.0 | 103.8 | 78.5  | 129.8 | -11.6 |
| Congo                            | 146.5 | 116.9 | 184.6 | 130.7 | 97.5  | 170.9 | -10.8 |
| Comoros                          | 97.6  | 79.8  | 119.3 | 95.1  | 71.9  | 124.8 | -2.6  |
| Djibouti                         | 93.3  | 72.4  | 118.1 | 106.4 | 77.5  | 142.6 | 14.1  |
| Kenya                            | 64.3  | 52.9  | 78.4  | 73.9  | 57.0  | 92.9  | 14.9  |

|                       |       |       |       |       |       |       |       |
|-----------------------|-------|-------|-------|-------|-------|-------|-------|
| Zambia                | 105.7 | 89.3  | 124.9 | 80.7  | 64.3  | 100.3 | -23.7 |
| Lesotho               | 88.9  | 69.2  | 110.4 | 113.5 | 83.2  | 144.5 | 27.6  |
| Eswatini              | 114.3 | 88.0  | 147.3 | 113.5 | 83.8  | 146.6 | -0.7  |
| Zimbabwe              | 134.4 | 112.6 | 156.4 | 153.0 | 123.6 | 186.8 | 13.8  |
| Cameroon              | 107.6 | 87.7  | 131.6 | 104.5 | 83.2  | 133.1 | -2.9  |
| Cabo Verde            | 102.2 | 84.2  | 121.0 | 128.7 | 109.8 | 144.6 | 25.9  |
| Côte d'Ivoire         | 136.8 | 115.3 | 161.6 | 113.7 | 92.5  | 138.0 | -16.9 |
| Ghana                 | 111.4 | 94.7  | 128.7 | 120.1 | 102.0 | 142.8 | 7.8   |
| Mauritania            | 112.1 | 93.4  | 133.2 | 98.9  | 81.3  | 119.7 | -11.8 |
| Nigeria               | 116.4 | 85.3  | 159.2 | 96.5  | 69.7  | 121.2 | -17.1 |
| Sao Tome and Principe | 127.4 | 108.8 | 144.9 | 141.5 | 114.6 | 164.2 | 11.1  |
| Senegal               | 112.4 | 95.2  | 133.2 | 110.8 | 89.4  | 134.8 | -1.4  |
| Sudan                 | 310.5 | 239.1 | 383.1 | 261.4 | 206.6 | 325.5 | -15.8 |
| China                 | 89.2  | 81.7  | 97.6  | 106.7 | 92.3  | 121.1 | 19.6  |
| Malaysia              | 179.8 | 168.2 | 189.8 | 138.7 | 111.8 | 169.2 | -22.8 |
| Maldives              | 203.9 | 185.5 | 225.8 | 112.6 | 93.6  | 131.9 | -44.8 |
| Sri Lanka             | 141.6 | 131.6 | 158.0 | 102.0 | 76.2  | 130.0 | -28   |

|                        |       |       |       |       |       |       |       |
|------------------------|-------|-------|-------|-------|-------|-------|-------|
| Thailand               | 77.7  | 66.7  | 88.7  | 48.3  | 36.3  | 61.8  | -37.8 |
| Fiji                   | 287.3 | 269.2 | 304.2 | 236.8 | 192.4 | 287.5 | -17.6 |
| Marshall Islands       | 246.4 | 197.3 | 307.2 | 257.2 | 196.7 | 331.5 | 4.4   |
| Samoa                  | 204.5 | 175.5 | 246.1 | 203.1 | 169.5 | 244.4 | -0.7  |
| Tonga                  | 136.4 | 120.0 | 153.7 | 122.7 | 99.0  | 147.4 | -10   |
| Armenia                | 307.2 | 283.1 | 326.0 | 222.1 | 187.0 | 256.8 | -27.7 |
| Azerbaijan             | 400.7 | 370.8 | 425.1 | 423.2 | 370.7 | 476.8 | 5.6   |
| Georgia                | 340.3 | 311.4 | 367.2 | 201.3 | 171.6 | 234.4 | -40.8 |
| Kazakhstan             | 419.7 | 395.2 | 437.4 | 240.0 | 208.8 | 270.3 | -42.8 |
| Turkmenistan           | 446.0 | 417.6 | 466.5 | 337.8 | 279.6 | 406.6 | -24.3 |
| Albania                | 137.8 | 125.6 | 146.2 | 136.8 | 106.6 | 173.9 | -0.7  |
| Bosnia and Herzegovina | 182.9 | 162.5 | 201.4 | 154.3 | 125.7 | 186.7 | -15.6 |
| Bulgaria               | 380.2 | 351.9 | 402.7 | 224.2 | 185.6 | 266.0 | -41   |
| North Macedonia        | 248.0 | 231.0 | 261.3 | 199.1 | 164.7 | 237.2 | -19.7 |
| Montenegro             | 161.2 | 147.4 | 172.5 | 157.0 | 132.3 | 182.0 | -2.6  |
| Romania                | 258.8 | 240.3 | 271.3 | 166.8 | 139.7 | 195.8 | -35.5 |
| Serbia                 | 259.5 | 240.5 | 272.4 | 195.1 | 162.5 | 230.1 | -24.8 |



|                                  |       |       |       |       |       |       |       |
|----------------------------------|-------|-------|-------|-------|-------|-------|-------|
| Belarus                          | 377.7 | 353.9 | 394.4 | 313.5 | 253.6 | 385.1 | -17   |
| Russian Federation               | 364.0 | 345.6 | 377.0 | 226.9 | 194.7 | 255.3 | -37.7 |
| Argentina                        | 105.7 | 97.5  | 111.7 | 76.4  | 69.3  | 82.0  | -27.8 |
| Belize                           | 148.1 | 137.8 | 158.2 | 78.0  | 68.1  | 88.7  | -47.4 |
| Cuba                             | 141.9 | 130.2 | 150.4 | 100.0 | 82.8  | 119.8 | -29.5 |
| Dominica                         | 103.5 | 89.2  | 118.0 | 82.2  | 68.9  | 97.8  | -20.6 |
| Dominican Republic               | 109.8 | 96.8  | 123.3 | 161.4 | 127.2 | 201.9 | 46.9  |
| Grenada                          | 122.4 | 112.5 | 131.1 | 99.2  | 89.9  | 107.8 | -19   |
| Guyana                           | 202.7 | 181.1 | 226.5 | 178.5 | 144.0 | 217.4 | -12   |
| Jamaica                          | 61.4  | 55.3  | 66.3  | 59.3  | 48.1  | 72.0  | -3.4  |
| Saint Lucia                      | 84.9  | 76.9  | 91.3  | 61.6  | 52.4  | 70.9  | -27.4 |
| Saint Vincent and the Grenadines | 140.2 | 127.5 | 150.6 | 120.8 | 105.7 | 135.2 | -13.8 |
| Suriname                         | 119.5 | 110.5 | 127.8 | 99.6  | 83.7  | 116.9 | -16.6 |
| Ecuador                          | 70.0  | 63.3  | 75.1  | 74.4  | 59.9  | 91.8  | 6.4   |
| Peru                             | 61.6  | 51.9  | 71.9  | 44.3  | 32.9  | 57.3  | -28.1 |
| Colombia                         | 100.7 | 91.0  | 108.2 | 69.4  | 54.5  | 87.1  | -31   |
| Costa Rica                       | 98.1  | 88.0  | 105.9 | 67.6  | 52.8  | 84.0  | -31.1 |

|                                    |       |       |       |       |       |       |       |
|------------------------------------|-------|-------|-------|-------|-------|-------|-------|
| Guatemala                          | 118.0 | 105.8 | 129.6 | 96.8  | 78.7  | 115.6 | -18   |
| Mexico                             | 91.0  | 82.8  | 96.3  | 93.2  | 80.2  | 105.9 | 2.5   |
| Venezuela (Bolivarian Republic of) | 133.1 | 122.7 | 140.5 | 122.3 | 95.7  | 155.2 | -8.1  |
| Brazil                             | 104.4 | 96.4  | 110.3 | 70.0  | 63.6  | 74.8  | -32.9 |
| Paraguay                           | 83.1  | 73.9  | 91.8  | 84.3  | 65.8  | 106.4 | 1.5   |
| Algeria                            | 303.2 | 251.4 | 359.0 | 224.9 | 185.1 | 269.1 | -25.8 |
| Iran (Islamic Republic of)         | 248.6 | 228.9 | 262.2 | 154.0 | 139.9 | 167.7 | -38.1 |
| Iraq                               | 289.5 | 231.7 | 359.3 | 246.5 | 205.0 | 284.9 | -14.9 |
| Jordan                             | 196.3 | 166.7 | 226.7 | 116.9 | 98.8  | 138.5 | -40.4 |
| Lebanon                            | 258.3 | 215.3 | 293.7 | 231.1 | 168.7 | 265.6 | -10.5 |
| Libya                              | 167.5 | 139.2 | 209.6 | 164.3 | 129.9 | 215.4 | -1.9  |
| Turkey                             | 159.1 | 139.0 | 177.2 | 112.8 | 90.8  | 137.1 | -29.1 |
| Equatorial Guinea                  | 111.3 | 81.5  | 147.6 | 90.0  | 64.4  | 121.1 | -19.2 |
| Gabon                              | 119.0 | 97.1  | 144.8 | 107.8 | 84.0  | 134.5 | -9.4  |
| Mauritius                          | 217.7 | 204.4 | 227.9 | 97.1  | 80.4  | 116.4 | -55.4 |
| Botswana                           | 146.4 | 105.5 | 195.5 | 122.9 | 93.0  | 161.3 | -16   |
| Namibia                            | 126.4 | 104.8 | 149.0 | 106.7 | 85.4  | 128.8 | -15.5 |

|                |       |       |       |       |       |       |       |
|----------------|-------|-------|-------|-------|-------|-------|-------|
| South Africa   | 108.6 | 101.4 | 115.3 | 76.9  | 69.0  | 82.9  | -29.3 |
| American Samoa | 143.7 | 129.9 | 157.8 | 141.7 | 122.0 | 163.0 | -1.4  |
| Nauru          | 382.4 | 315.3 | 451.5 | 335.7 | 277.3 | 400.8 | -12.2 |
| Tuvalu         | 235.1 | 205.1 | 272.8 | 234.2 | 186.4 | 295.2 | -0.4  |

---

\*LMICs: low- and middle-income countries

**Table S7. Age-standardized DALY\* rate (1/100,000) and percentage change for IHD by country in LMICs<sup>§</sup> from 2000 to 2019**

|                                       | 2000   |             |             | 2019   |             |             | % of change, 2000-2019 |
|---------------------------------------|--------|-------------|-------------|--------|-------------|-------------|------------------------|
|                                       | value  | lower limit | upper limit | value  | lower limit | upper limit |                        |
| Democratic People's Republic of Korea | 2230.4 | 1765.4      | 2717.7      | 2278.7 | 1872.1      | 2781.0      | 2.2                    |
| Tajikistan                            | 5702.8 | 5184.2      | 6190.5      | 6860.6 | 5758.5      | 8230.5      | 20.3                   |
| Haiti                                 | 3880.6 | 3070.8      | 4837.9      | 3647.7 | 2618.5      | 5046.9      | -6                     |
| Syrian Arab Republic                  | 7313.0 | 6443.4      | 8240.4      | 6187.1 | 4823.0      | 8005.2      | -15.4                  |
| Yemen                                 | 6343.9 | 4946.6      | 8028.5      | 5609.5 | 4452.9      | 7368.2      | -11.6                  |
| Afghanistan                           | 9077.9 | 7150.3      | 11353.1     | 6640.9 | 5195.3      | 8201.8      | -26.8                  |
| Nepal                                 | 2186.1 | 1849.3      | 2641.5      | 2332.1 | 1834.6      | 2863.9      | 6.7                    |
| Central African Republic              | 2969.6 | 2213.0      | 3818.9      | 2936.5 | 2210.5      | 3824.5      | -1.1                   |
| Democratic Republic of the Congo      | 2313.6 | 1860.6      | 2939.0      | 2047.6 | 1495.5      | 2739.6      | -11.5                  |
| Burundi                               | 2400.0 | 1913.8      | 3009.0      | 2046.3 | 1543.2      | 2696.9      | -14.7                  |
| Eritrea                               | 1931.8 | 1446.6      | 2481.2      | 2047.1 | 1573.8      | 2623.7      | 6                      |
| Ethiopia                              | 1880.8 | 1561.2      | 2231.4      | 1382.8 | 1025.9      | 1743.1      | -26.5                  |
| Madagascar                            | 2471.2 | 2069.3      | 2867.1      | 2354.5 | 1696.7      | 3140.4      | -4.7                   |

---

|                             |        |        |        |        |        |        |       |
|-----------------------------|--------|--------|--------|--------|--------|--------|-------|
| Malawi                      | 2126.5 | 1797.2 | 2503.9 | 1706.5 | 1334.5 | 2124.1 | -19.8 |
| Mozambique                  | 1438.7 | 1182.2 | 1700.4 | 1895.9 | 1461.4 | 2419.1 | 31.8  |
| Rwanda                      | 1838.9 | 1442.4 | 2311.6 | 1361.6 | 989.7  | 1808.4 | -26   |
| Somalia                     | 2156.9 | 1578.1 | 2778.3 | 2390.9 | 1761.2 | 3224.6 | 10.8  |
| United Republic of Tanzania | 1576.6 | 1319.0 | 1886.1 | 1617.8 | 1176.0 | 2069.4 | 2.6   |
| Uganda                      | 1750.7 | 1304.6 | 2177.8 | 1465.5 | 1033.7 | 1858.4 | -16.3 |
| Benin                       | 2122.8 | 1780.5 | 2518.8 | 1954.3 | 1550.8 | 2472.5 | -7.9  |
| Burkina Faso                | 2104.4 | 1767.2 | 2458.6 | 2234.4 | 1830.9 | 2667.4 | 6.2   |
| Chad                        | 2113.2 | 1734.5 | 2641.5 | 2115.8 | 1722.0 | 2610.4 | 0.1   |
| Gambia                      | 2272.0 | 1816.1 | 2745.0 | 2629.9 | 2094.7 | 3241.3 | 15.8  |
| Guinea                      | 1819.6 | 1469.8 | 2194.6 | 2175.7 | 1740.3 | 2704.4 | 19.6  |
| Guinea-Bissau               | 3075.5 | 2531.1 | 3790.0 | 3080.4 | 2416.1 | 3850.2 | 0.2   |
| Liberia                     | 2122.3 | 1731.6 | 2570.4 | 2029.4 | 1561.0 | 2630.4 | -4.4  |
| Mali                        | 1863.1 | 1560.7 | 2202.6 | 1856.4 | 1481.3 | 2335.1 | -0.4  |
| Niger                       | 1999.7 | 1549.3 | 2487.8 | 1985.6 | 1525.0 | 2541.5 | -0.7  |
| Sierra Leone                | 2379.4 | 1827.0 | 3057.6 | 2355.4 | 1745.5 | 3096.4 | -1    |
| Togo                        | 2497.0 | 2047.8 | 3018.2 | 2376.8 | 1873.4 | 3036.6 | -4.8  |

---

---

|                                  |        |        |         |         |        |         |       |
|----------------------------------|--------|--------|---------|---------|--------|---------|-------|
| South Sudan                      | 1413.4 | 1065.7 | 1816.8  | 1450.6  | 1024.8 | 1956.2  | 2.6   |
| Cambodia                         | 2328.9 | 1958.8 | 2814.0  | 2098.7  | 1679.7 | 2556.7  | -9.9  |
| Indonesia                        | 2504.8 | 2266.4 | 2736.6  | 2654.2  | 2240.7 | 2996.9  | 6     |
| Lao People's Democratic Republic | 3365.8 | 2805.8 | 4102.8  | 2923.4  | 2352.7 | 3538.0  | -13.1 |
| Myanmar                          | 2761.3 | 2269.7 | 3346.6  | 1882.7  | 1609.0 | 2206.6  | -31.8 |
| Philippines                      | 2482.0 | 2251.8 | 2691.3  | 2838.3  | 2311.3 | 3389.8  | 14.4  |
| Timor-Leste                      | 2003.4 | 1500.9 | 2573.2  | 2700.0  | 1977.7 | 3446.4  | 34.8  |
| Viet Nam                         | 1620.4 | 1415.1 | 1855.3  | 1596.6  | 1292.4 | 1931.7  | -1.5  |
| Kiribati                         | 6474.4 | 5390.5 | 7597.9  | 5996.1  | 4788.2 | 7486.8  | -7.4  |
| Micronesia (Federated States of) | 5961.3 | 4792.9 | 7510.5  | 6248.4  | 4376.3 | 8275.0  | 4.8   |
| Papua New Guinea                 | 3304.7 | 2313.3 | 4665.9  | 3699.7  | 2691.5 | 5055.4  | 12    |
| Solomon Islands                  | 9933.9 | 8011.2 | 12171.2 | 10199.5 | 8153.9 | 12273.7 | 2.7   |
| Vanuatu                          | 6381.3 | 4942.1 | 8201.5  | 6643.0  | 5122.3 | 8877.4  | 4.1   |
| Kyrgyzstan                       | 5248.7 | 4957.0 | 5492.2  | 4729.5  | 4166.6 | 5297.0  | -9.9  |
| Mongolia                         | 8878.0 | 7622.8 | 10209.3 | 5208.6  | 4183.8 | 6487.1  | -41.3 |
| Uzbekistan                       | 9445.7 | 9070.5 | 9780.8  | 10506.1 | 9231.9 | 11896.1 | 11.2  |
| Republic of Moldova              | 6493.2 | 6176.2 | 6729.2  | 4155.0  | 3638.8 | 4706.2  | -36   |

---

---

|                                  |        |        |        |        |        |        |       |
|----------------------------------|--------|--------|--------|--------|--------|--------|-------|
| Ukraine                          | 7574.2 | 7279.6 | 7812.1 | 6965.1 | 6011.7 | 8079.5 | -8    |
| Bolivia (Plurinational State of) | 1850.7 | 1346.8 | 2412.3 | 1642.2 | 1157.4 | 2190.0 | -11.3 |
| El Salvador                      | 1899.3 | 1776.9 | 2029.9 | 1722.1 | 1320.1 | 2208.2 | -9.3  |
| Honduras                         | 2338.7 | 1833.2 | 3038.6 | 2499.8 | 2056.9 | 3090.3 | 6.9   |
| Nicaragua                        | 2127.6 | 1973.8 | 2261.8 | 2169.3 | 1830.4 | 2513.9 | 2     |
| Egypt                            | 6625.3 | 6091.7 | 7405.7 | 6677.5 | 5102.2 | 8580.3 | 0.8   |
| Morocco                          | 5413.2 | 4690.5 | 6273.6 | 4927.7 | 3823.7 | 5872.6 | -9    |
| Palestine                        | 4952.4 | 4427.8 | 5521.7 | 3634.4 | 3164.5 | 4163.7 | -26.6 |
| Tunisia                          | 4064.4 | 3308.1 | 4830.1 | 3197.0 | 2379.9 | 4145.1 | -21.3 |
| Bangladesh                       | 2077.6 | 1833.9 | 2291.4 | 2182.8 | 1706.8 | 2685.8 | 5.1   |
| Bhutan                           | 2560.0 | 2068.5 | 3105.0 | 2441.3 | 1886.2 | 3046.4 | -4.6  |
| India                            | 3278.4 | 3001.4 | 3572.2 | 3024.7 | 2608.3 | 3469.3 | -7.7  |
| Pakistan                         | 4092.6 | 3643.1 | 4599.4 | 4016.6 | 3312.7 | 4875.7 | -1.9  |
| Angola                           | 2424.4 | 2007.9 | 2912.3 | 2008.0 | 1556.7 | 2547.8 | -17.2 |
| Congo                            | 3032.5 | 2428.3 | 3794.2 | 2510.2 | 1879.9 | 3349.6 | -17.2 |
| Comoros                          | 1912.3 | 1559.6 | 2340.5 | 1815.9 | 1366.6 | 2387.5 | -5    |
| Djibouti                         | 1852.7 | 1411.7 | 2404.5 | 2037.2 | 1447.8 | 2785.0 | 10    |

---

---

|                       |        |        |        |        |        |        |       |
|-----------------------|--------|--------|--------|--------|--------|--------|-------|
| Kenya                 | 1267.6 | 1062.8 | 1518.9 | 1420.7 | 1127.4 | 1768.2 | 12.1  |
| Zambia                | 2303.6 | 1932.4 | 2736.4 | 1637.9 | 1288.2 | 2065.1 | -28.9 |
| Lesotho               | 1834.7 | 1425.2 | 2273.5 | 2349.3 | 1719.6 | 3066.4 | 28.1  |
| Eswatini              | 2362.4 | 1767.6 | 3105.4 | 2263.9 | 1661.8 | 3035.8 | -4.2  |
| Zimbabwe              | 2573.6 | 2177.7 | 2995.5 | 2935.0 | 2330.0 | 3617.4 | 14    |
| Cameroon              | 2065.7 | 1672.9 | 2534.2 | 1967.7 | 1519.6 | 2560.3 | -4.7  |
| Cabo Verde            | 1908.5 | 1574.3 | 2277.1 | 2197.8 | 1895.4 | 2505.8 | 15.2  |
| Côte d'Ivoire         | 2708.8 | 2245.8 | 3252.2 | 2134.7 | 1654.0 | 2677.9 | -21.2 |
| Ghana                 | 2137.2 | 1792.4 | 2499.5 | 2186.4 | 1821.8 | 2639.7 | 2.3   |
| Mauritania            | 2068.8 | 1703.9 | 2473.9 | 1735.4 | 1370.1 | 2181.1 | -16.1 |
| Nigeria               | 2169.3 | 1544.5 | 3041.7 | 1713.5 | 1250.6 | 2211.0 | -21   |
| Sao Tome and Principe | 2346.9 | 2026.8 | 2698.3 | 2456.7 | 1963.6 | 2888.6 | 4.7   |
| Senegal               | 2016.8 | 1663.8 | 2437.9 | 2001.6 | 1568.5 | 2496.8 | -0.8  |
| Sudan                 | 6461.0 | 4869.8 | 8156.2 | 5118.2 | 3975.8 | 6569.8 | -20.8 |
| China                 | 1611.0 | 1489.3 | 1754.5 | 1753.9 | 1514.9 | 1997.0 | 8.9   |
| Malaysia              | 3512.6 | 3333.1 | 3659.7 | 2822.6 | 2249.1 | 3450.3 | -19.6 |
| Maldives              | 3907.4 | 3596.8 | 4320.2 | 2013.3 | 1692.8 | 2346.0 | -48.5 |

---



---

|                        |        |        |        |        |        |        |       |
|------------------------|--------|--------|--------|--------|--------|--------|-------|
| Sri Lanka              | 2894.8 | 2751.1 | 3158.2 | 1883.0 | 1415.2 | 2416.0 | -35   |
| Thailand               | 1523.9 | 1325.2 | 1740.1 | 964.9  | 728.6  | 1248.9 | -36.7 |
| Fiji                   | 6438.3 | 6112.4 | 6766.4 | 5236.6 | 4185.6 | 6440.3 | -18.7 |
| Marshall Islands       | 5876.5 | 4705.1 | 7318.8 | 5979.0 | 4491.8 | 7930.7 | 1.7   |
| Samoa                  | 4522.4 | 3786.3 | 5528.8 | 4407.2 | 3580.6 | 5424.6 | -2.5  |
| Tonga                  | 2971.0 | 2627.1 | 3334.3 | 2661.1 | 2113.9 | 3257.0 | -10.4 |
| Armenia                | 5000.1 | 4726.1 | 5214.9 | 3736.3 | 3163.9 | 4354.0 | -25.3 |
| Azerbaijan             | 7522.0 | 6979.7 | 7972.7 | 6721.3 | 5869.0 | 7679.7 | -10.6 |
| Georgia                | 6704.1 | 6192.5 | 7221.1 | 3760.7 | 3202.1 | 4369.2 | -43.9 |
| Kazakhstan             | 8029.1 | 7700.3 | 8315.2 | 3878.8 | 3354.3 | 4451.7 | -51.7 |
| Turkmenistan           | 8562.9 | 8229.4 | 8862.6 | 6226.7 | 5088.7 | 7583.8 | -27.3 |
| Albania                | 2432.5 | 2279.4 | 2551.8 | 2305.0 | 1780.4 | 2967.1 | -5.2  |
| Bosnia and Herzegovina | 3309.8 | 2986.2 | 3616.8 | 2480.0 | 2023.7 | 3038.1 | -25.1 |
| Bulgaria               | 6476.2 | 6097.5 | 6803.9 | 3858.7 | 3149.0 | 4676.2 | -40.4 |
| North Macedonia        | 4422.2 | 4189.3 | 4639.9 | 3200.1 | 2607.9 | 3894.1 | -27.6 |
| Montenegro             | 3096.3 | 2913.3 | 3273.9 | 2737.1 | 2302.8 | 3224.0 | -11.6 |
| Romania                | 4446.4 | 4250.4 | 4606.6 | 2806.5 | 2341.2 | 3320.0 | -36.9 |

---

---

|                                  |        |        |        |        |        |        |       |
|----------------------------------|--------|--------|--------|--------|--------|--------|-------|
| Serbia                           | 4393.2 | 4167.6 | 4550.6 | 2914.8 | 2390.5 | 3496.7 | -33.7 |
| Belarus                          | 6913.6 | 6633.8 | 7129.2 | 5452.9 | 4389.8 | 6815.6 | -21.1 |
| Russian Federation               | 7056.9 | 6821.1 | 7224.3 | 4117.5 | 3581.2 | 4700.5 | -41.7 |
| Argentina                        | 1951.8 | 1857.4 | 2032.0 | 1372.0 | 1281.4 | 1456.5 | -29.7 |
| Belize                           | 2896.1 | 2729.5 | 3082.9 | 1546.0 | 1357.4 | 1754.5 | -46.6 |
| Cuba                             | 2566.4 | 2431.0 | 2674.0 | 1803.4 | 1493.0 | 2169.7 | -29.7 |
| Dominica                         | 1824.5 | 1587.3 | 2080.9 | 1456.7 | 1213.4 | 1742.6 | -20.2 |
| Dominican Republic               | 2260.8 | 2036.2 | 2515.8 | 3254.8 | 2497.0 | 4172.1 | 44    |
| Grenada                          | 2300.1 | 2140.4 | 2440.4 | 1895.0 | 1719.5 | 2071.3 | -17.6 |
| Guyana                           | 4384.3 | 3897.0 | 4945.5 | 3686.1 | 2915.3 | 4591.8 | -15.9 |
| Jamaica                          | 1177.7 | 1088.4 | 1254.6 | 1152.8 | 929.9  | 1400.8 | -2.1  |
| Saint Lucia                      | 1501.8 | 1391.1 | 1595.1 | 1126.8 | 962.6  | 1308.0 | -25   |
| Saint Vincent and the Grenadines | 2505.5 | 2335.1 | 2667.4 | 2098.4 | 1843.1 | 2360.6 | -16.2 |
| Suriname                         | 2537.6 | 2385.7 | 2700.9 | 2111.0 | 1785.1 | 2486.8 | -16.8 |
| Ecuador                          | 1330.0 | 1247.8 | 1405.4 | 1314.5 | 1055.1 | 1658.4 | -1.2  |
| Peru                             | 1094.3 | 932.8  | 1275.4 | 786.7  | 579.7  | 1025.2 | -28.1 |
| Colombia                         | 1890.5 | 1780.1 | 1986.9 | 1255.8 | 993.7  | 1588.2 | -33.6 |

---

---

|                                       |        |        |        |        |        |        |       |
|---------------------------------------|--------|--------|--------|--------|--------|--------|-------|
| Costa Rica                            | 1770.1 | 1654.8 | 1871.5 | 1267.9 | 1007.1 | 1597.9 | -28.4 |
| Guatemala                             | 1970.4 | 1772.9 | 2184.8 | 1581.8 | 1276.6 | 1924.5 | -19.7 |
| Mexico                                | 1635.3 | 1550.8 | 1698.1 | 1656.5 | 1431.7 | 1889.6 | 1.3   |
| Venezuela<br>(Bolivarian Republic of) | 2717.3 | 2586.0 | 2831.7 | 2427.6 | 1865.6 | 3141.1 | -10.7 |
| Brazil                                | 2199.6 | 2101.1 | 2291.8 | 1480.2 | 1384.9 | 1562.3 | -32.7 |
| Paraguay                              | 1637.4 | 1494.6 | 1797.6 | 1672.0 | 1311.4 | 2132.1 | 2.1   |
| Algeria                               | 5187.6 | 4174.9 | 6282.5 | 3591.0 | 2901.7 | 4443.0 | -30.8 |
| Iran (Islamic Republic of)            | 4611.0 | 4378.1 | 4840.5 | 2698.1 | 2512.7 | 2960.7 | -41.5 |
| Iraq                                  | 5996.5 | 4693.3 | 7641.6 | 4643.7 | 3732.1 | 5568.4 | -22.6 |
| Jordan                                | 3814.4 | 3220.4 | 4466.6 | 2193.0 | 1863.8 | 2612.6 | -42.5 |
| Lebanon                               | 4790.3 | 4043.6 | 5508.7 | 4332.9 | 3201.3 | 5043.4 | -9.5  |
| Libya                                 | 3453.2 | 2995.6 | 4410.0 | 3302.0 | 2608.1 | 4427.1 | -4.4  |
| Turkey                                | 3399.1 | 3028.7 | 3739.1 | 2014.0 | 1628.5 | 2453.1 | -40.7 |
| Equatorial Guinea                     | 2170.5 | 1585.5 | 2911.1 | 1586.2 | 1128.2 | 2231.2 | -26.9 |
| Gabon                                 | 2350.5 | 1921.6 | 2828.9 | 2022.1 | 1561.8 | 2537.7 | -14   |
| Mauritius                             | 4605.9 | 4399.9 | 4795.4 | 1921.1 | 1587.1 | 2310.5 | -58.3 |

---

|                |        |        |         |        |        |        |       |
|----------------|--------|--------|---------|--------|--------|--------|-------|
| Botswana       | 3158.7 | 2222.9 | 4254.9  | 2429.6 | 1776.0 | 3237.3 | -23.1 |
| Namibia        | 2524.1 | 2090.2 | 2990.6  | 2005.3 | 1587.1 | 2513.7 | -20.6 |
| South Africa   | 2212.8 | 2098.0 | 2335.4  | 1423.8 | 1286.4 | 1535.6 | -35.7 |
| American Samoa | 3191.0 | 2853.8 | 3509.8  | 3125.1 | 2637.5 | 3668.8 | -2.1  |
| Nauru          | 9445.0 | 7590.7 | 11411.8 | 7946.1 | 6402.3 | 9674.6 | -15.9 |
| Tuvalu         | 5367.8 | 4659.7 | 6257.6  | 5313.2 | 4125.2 | 6859.2 | -1.0  |

\* DALY: disability adjusted life years

§ LMICs: low- and middle-income countries

**Table S8. PAF<sup>†</sup>(%) for IHD<sup>§</sup> Deaths and DALYs\* attributable to all modifiable risk factors by region and sex in 2019**

|              | <b>Death</b>         | <b>DALY</b>          |
|--------------|----------------------|----------------------|
| Low-income   |                      |                      |
| male         | 93.0<br>(90.7, 95.0) | 93.3<br>(91.5, 94.9) |
| female       | 91.9<br>(89.1, 94.5) | 92.5<br>(90.4, 94.4) |
| Lower-middle |                      |                      |
| male         | 94.6<br>(92.7, 96.4) | 95.2<br>(93.8, 96.5) |
| female       | 93.5<br>(90.9, 95.8) | 93.9<br>(92.0, 95.6) |
| Upper-middle |                      |                      |
| male         | 94.1<br>(91.7, 96.2) | 95.4<br>(93.7, 96.8) |
| female       | 92.4<br>(88.8, 95.4) | 93.5<br>(90.9, 95.7) |

\* DALY: disability adjusted life years

§ IHD: ischemic heart disease

† PAF: population attributable fraction

**Table S9. PAF\*(%) for IHD<sup>§</sup> death by age in LMICs<sup>†</sup> in 2019**

|             | Low-income           | Lower-middle income countries | Upper-middle income countries |
|-------------|----------------------|-------------------------------|-------------------------------|
| 15-49 years | 92.6<br>(91.0, 94.3) | 94.7<br>(93.3, 96.0)          | 96.8<br>(95.7, 97.8)          |
| 50-69 years | 95.6<br>(93.8, 97.1) | 96.7<br>(95.3, 97.9)          | 97.0<br>(95.6, 98.1)          |
| 70+ years   | 90.2<br>(86.4, 93.8) | 92.2<br>(88.7, 95.4)          | 91.7<br>(87.8, 95.1)          |

\*PAF: population attributable fraction

§ IHD: ischemic heart disease

† LMICs: low- and middle-income countries

**Table S10. PAF\* (%) for IHD<sup>§</sup> DALY<sup>†</sup> by age in LMICs<sup>¶</sup> in 2019**

|             | Low-income   | Lower-middle income countries |
|-------------|--------------|-------------------------------|
|             | 90.4         | 93.1                          |
| 15-49 years | (88.5, 92.4) | (91.5, 94.9)                  |
|             | 95.8         | 96.8                          |
| 50-69 years | (94.1, 97.2) | (95.5, 98.0)                  |
|             | 90.6         | 92.6                          |
| 70+ years   | (87.1, 93.9) | (89.4, 95.5)                  |

\*PAF: population attributable fraction

§ IHD: ischemic heart disease

† DALY: disability adjusted life years

¶ LMICs: low- and middle-income countries

**Table S11. Male to female ratio in IHD age-standardized death rate attributable to all modifiable risk factors by region and year in globe and LMICs\*, 2000–2019**

|      | <b>Globe</b> | <b>LICs<sup>§</sup></b> | <b>Lower-MICs<sup>‡</sup></b> | <b>Upper-MICs<sup>¶</sup></b> |
|------|--------------|-------------------------|-------------------------------|-------------------------------|
| 2000 | 1.47         | 1.36                    | 1.27                          | 1.36                          |
| 2001 | 1.47         | 1.34                    | 1.28                          | 1.37                          |
| 2002 | 1.47         | 1.33                    | 1.28                          | 1.38                          |
| 2003 | 1.48         | 1.32                    | 1.31                          | 1.38                          |
| 2004 | 1.49         | 1.31                    | 1.32                          | 1.39                          |
| 2005 | 1.49         | 1.31                    | 1.33                          | 1.40                          |
| 2006 | 1.50         | 1.31                    | 1.34                          | 1.39                          |
| 2007 | 1.51         | 1.31                    | 1.36                          | 1.40                          |
| 2008 | 1.52         | 1.31                    | 1.38                          | 1.42                          |
| 2009 | 1.53         | 1.31                    | 1.39                          | 1.43                          |
| 2010 | 1.54         | 1.31                    | 1.41                          | 1.43                          |
| 2011 | 1.54         | 1.31                    | 1.41                          | 1.44                          |
| 2012 | 1.55         | 1.31                    | 1.41                          | 1.47                          |
| 2013 | 1.55         | 1.31                    | 1.42                          | 1.48                          |
| 2014 | 1.55         | 1.31                    | 1.42                          | 1.48                          |
| 2015 | 1.54         | 1.32                    | 1.40                          | 1.49                          |
| 2016 | 1.54         | 1.32                    | 1.40                          | 1.50                          |
| 2017 | 1.54         | 1.31                    | 1.40                          | 1.49                          |
| 2018 | 1.54         | 1.31                    | 1.41                          | 1.47                          |
| 2019 | 1.53         | 1.31                    | 1.42                          | 1.48                          |

\* LMICs: low- and middle-income countries

§ LICs: low-income countries

‡ Lower-MIC: lower-middle income countries

¶ Upper-MIC: upper-middle income countries



**Table S12. Male to female ratio in IHD age-standardized DALY\* rate attributable to all modifiable risk factors by region and year in globe and LMICs<sup>§</sup>, 2000–2019**

|      | Globe | LICs <sup>‡</sup> | Lower-MICs <sup>¶</sup> | Upper-MICs <sup>£</sup> |
|------|-------|-------------------|-------------------------|-------------------------|
| 2000 | 1.73  | 1.50              | 1.53                    | 1.64                    |
| 2001 | 1.74  | 1.49              | 1.53                    | 1.64                    |
| 2002 | 1.74  | 1.48              | 1.53                    | 1.65                    |
| 2003 | 1.75  | 1.47              | 1.53                    | 1.65                    |
| 2004 | 1.75  | 1.46              | 1.53                    | 1.66                    |
| 2005 | 1.77  | 1.46              | 1.53                    | 1.67                    |
| 2006 | 1.77  | 1.46              | 1.53                    | 1.67                    |
| 2007 | 1.78  | 1.46              | 1.53                    | 1.67                    |
| 2008 | 1.80  | 1.46              | 1.53                    | 1.70                    |
| 2009 | 1.81  | 1.46              | 1.53                    | 1.71                    |
| 2010 | 1.81  | 1.46              | 1.53                    | 1.72                    |
| 2011 | 1.82  | 1.47              | 1.53                    | 1.73                    |
| 2012 | 1.82  | 1.47              | 1.53                    | 1.76                    |
| 2013 | 1.82  | 1.47              | 1.53                    | 1.77                    |
| 2014 | 1.81  | 1.47              | 1.53                    | 1.77                    |
| 2015 | 1.80  | 1.47              | 1.53                    | 1.79                    |
| 2016 | 1.80  | 1.47              | 1.53                    | 1.79                    |
| 2017 | 1.80  | 1.47              | 1.53                    | 1.78                    |
| 2018 | 1.80  | 1.47              | 1.53                    | 1.77                    |
| 2019 | 1.79  | 1.47              | 1.53                    | 1.77                    |

\* DALY: disability adjusted life years

§ LMICs: low- and middle-income countries

‡ LICs: low-income countries

¶ Lower-MIC: lower-middle income countries

£ Upper-MIC: upper-middle income countries

**Table S13. PAF\* of IHD deaths by age and sex in low income countries in 2019**

|                                         | males |             |             | females |             |             | both  |             |             |
|-----------------------------------------|-------|-------------|-------------|---------|-------------|-------------|-------|-------------|-------------|
|                                         | value | lower limit | upper limit | value   | lower limit | upper limit | value | lower limit | upper limit |
| <b>Metabolic risks</b>                  |       |             |             |         |             |             |       |             |             |
| 25 to 29                                | 88.1  | 77.6        | 95.5        | 87.0    | 76.6        | 94.6        | 87.7  | 77.7        | 95.0        |
| 30 to 34                                | 87.9  | 79.2        | 94.6        | 87.8    | 79.1        | 94.6        | 87.9  | 79.3        | 94.3        |
| 35 to 39                                | 87.3  | 80.0        | 93.0        | 87.8    | 80.5        | 93.3        | 87.4  | 80.4        | 93.1        |
| 40 to 44                                | 86.5  | 79.2        | 92.2        | 87.8    | 80.6        | 93.0        | 87.0  | 79.8        | 92.3        |
| 45 to 49                                | 86.6  | 79.8        | 92.0        | 88.6    | 82.2        | 93.4        | 87.3  | 80.8        | 92.4        |
| 50 to 54                                | 85.6  | 79.4        | 91.0        | 88.2    | 82.4        | 92.6        | 86.5  | 80.6        | 91.5        |
| 55 to 59                                | 84.0  | 78.2        | 89.3        | 86.4    | 80.7        | 91.3        | 84.9  | 79.3        | 89.9        |
| 60 to 64                                | 81.5  | 75.1        | 87.2        | 84.3    | 78.5        | 89.6        | 82.6  | 76.5        | 88.0        |
| 65 to 69                                | 78.5  | 69.7        | 85.9        | 80.3    | 71.5        | 87.1        | 79.3  | 70.5        | 86.6        |
| 70 to 74                                | 75.4  | 64.9        | 84.2        | 76.7    | 67.1        | 85.1        | 76.0  | 66.3        | 84.4        |
| 75 to 79                                | 75.5  | 66.6        | 84.2        | 76.6    | 68.0        | 84.8        | 76.1  | 67.8        | 84.5        |
| 80 plus                                 | 72.7  | 59.7        | 85.6        | 73.9    | 61.7        | 85.7        | 73.4  | 60.9        | 85.3        |
| <b>Environmental/occupational risks</b> |       |             |             |         |             |             |       |             |             |
| 25 to 29                                | 59.1  | 50.6        | 66.6        | 59.5    | 51.0        | 67.8        | 59.2  | 50.7        | 67.3        |
| 30 to 34                                | 57.6  | 49.2        | 65.3        | 58.0    | 49.1        | 66.7        | 57.7  | 49.1        | 65.6        |
| 35 to 39                                | 55.7  | 47.5        | 63.4        | 56.0    | 47.4        | 64.7        | 55.8  | 47.5        | 63.8        |
| 40 to 44                                | 54.2  | 45.8        | 62.0        | 54.4    | 45.2        | 63.5        | 54.3  | 45.5        | 62.5        |
| 45 to 49                                | 52.8  | 44.9        | 60.5        | 52.8    | 44.2        | 61.5        | 52.8  | 44.7        | 60.9        |
| 50 to 54                                | 50.6  | 42.9        | 58.2        | 50.4    | 42.0        | 59.9        | 50.5  | 42.6        | 58.9        |
| 55 to 59                                | 48.5  | 41.1        | 57.2        | 48.5    | 40.2        | 59.7        | 48.5  | 40.8        | 58.2        |
| 60 to 64                                | 46.1  | 38.6        | 54.3        | 45.7    | 37.3        | 56.7        | 45.9  | 38.2        | 55.3        |
| 65 to 69                                | 43.8  | 36.9        | 52.6        | 43.3    | 35.6        | 55.6        | 43.5  | 36.5        | 54.1        |
| 70 to 74                                | 41.5  | 34.2        | 50.7        | 41.0    | 32.3        | 53.8        | 41.3  | 33.4        | 52.1        |

|          |      |      |      |      |      |      |      |      |      |
|----------|------|------|------|------|------|------|------|------|------|
| 75 to 79 | 38.6 | 32.0 | 47.7 | 37.5 | 30.0 | 49.3 | 38.0 | 30.9 | 48.2 |
| 80 plus  | 33.4 | 28.8 | 39.8 | 31.4 | 26.5 | 38.7 | 32.2 | 27.4 | 39.1 |

---

**Behavioral risks**

|          |      |      |      |      |      |      |      |      |      |
|----------|------|------|------|------|------|------|------|------|------|
| 25 to 29 | 78.3 | 69.3 | 84.4 | 80.1 | 71.6 | 85.9 | 78.9 | 70.2 | 84.9 |
| 30 to 34 | 81.8 | 74.4 | 86.8 | 80.4 | 71.6 | 86.0 | 81.3 | 73.4 | 86.5 |
| 35 to 39 | 82.7 | 75.5 | 87.3 | 79.9 | 71.2 | 85.5 | 81.8 | 74.4 | 86.7 |
| 40 to 44 | 79.1 | 72.0 | 84.1 | 74.5 | 65.6 | 80.5 | 77.6 | 70.0 | 82.7 |
| 45 to 49 | 79.3 | 72.4 | 84.0 | 74.3 | 65.8 | 80.5 | 77.5 | 70.1 | 82.6 |
| 50 to 54 | 77.3 | 70.6 | 82.1 | 71.4 | 63.0 | 77.6 | 75.2 | 67.8 | 80.4 |
| 55 to 59 | 72.0 | 64.8 | 77.6 | 66.2 | 57.3 | 73.3 | 69.8 | 62.0 | 76.0 |
| 60 to 64 | 68.9 | 61.6 | 75.5 | 62.2 | 53.7 | 69.8 | 66.3 | 58.9 | 73.2 |
| 65 to 69 | 64.3 | 56.7 | 71.4 | 58.6 | 50.2 | 66.8 | 61.8 | 54.0 | 69.5 |
| 70 to 74 | 61.0 | 53.6 | 68.1 | 55.4 | 47.5 | 63.3 | 58.3 | 50.7 | 65.7 |
| 75 to 79 | 56.2 | 48.3 | 63.9 | 51.7 | 44.0 | 59.8 | 53.8 | 46.0 | 62.0 |
| 80 plus  | 55.1 | 47.3 | 62.7 | 51.8 | 43.9 | 59.4 | 53.1 | 45.3 | 60.6 |

---

\* PAF: population attributable fraction

**Table S14. PAF\* of IHD deaths by age and sex in lower-middle income countries in 2019**

|                                         | males |             |             | females |             |             | both  |             |             |
|-----------------------------------------|-------|-------------|-------------|---------|-------------|-------------|-------|-------------|-------------|
|                                         | value | lower limit | upper limit | value   | lower limit | upper limit | value | lower limit | upper limit |
| <b>Metabolic risks</b>                  |       |             |             |         |             |             |       |             |             |
| 25 to 29                                | 90.6  | 81.5        | 96.8        | 87.5    | 77.9        | 94.9        | 89.6  | 80.4        | 96.0        |
| 30 to 34                                | 90.7  | 83.4        | 95.9        | 88.9    | 80.8        | 94.6        | 90.2  | 82.8        | 95.5        |
| 35 to 39                                | 90.3  | 84.4        | 94.8        | 89.6    | 83.5        | 94.2        | 90.1  | 84.3        | 94.6        |
| 40 to 44                                | 89.3  | 83.2        | 93.8        | 89.2    | 83.4        | 93.8        | 89.3  | 83.3        | 93.8        |
| 45 to 49                                | 89.2  | 83.5        | 93.7        | 89.7    | 84.2        | 93.9        | 89.3  | 83.7        | 93.6        |
| 50 to 54                                | 88.4  | 83.1        | 92.8        | 89.6    | 84.6        | 93.4        | 88.7  | 83.7        | 93.0        |
| 55 to 59                                | 87.7  | 82.7        | 92.2        | 89.2    | 85.1        | 93.2        | 88.2  | 83.4        | 92.4        |
| 60 to 64                                | 86.0  | 80.5        | 90.9        | 87.9    | 83.2        | 92.2        | 86.7  | 81.4        | 91.4        |
| 65 to 69                                | 82.4  | 74.5        | 89.4        | 84.7    | 77.8        | 90.6        | 83.3  | 75.7        | 89.9        |
| 70 to 74                                | 79.4  | 70.0        | 87.5        | 82.2    | 73.8        | 89.3        | 80.6  | 71.6        | 88.4        |
| 75 to 79                                | 79.5  | 71.1        | 87.4        | 82.5    | 75.6        | 89.4        | 80.9  | 73.3        | 88.4        |
| 80 plus                                 | 77.2  | 64.6        | 89.3        | 80.3    | 68.5        | 90.3        | 78.9  | 66.7        | 89.7        |
| <b>Environmental/occupational risks</b> |       |             |             |         |             |             |       |             |             |
| 25 to 29                                | 52.9  | 45.1        | 60.1        | 54.2    | 46.6        | 61.4        | 53.3  | 45.6        | 60.6        |
| 30 to 34                                | 51.8  | 43.6        | 59.2        | 52.2    | 44.1        | 59.7        | 51.9  | 43.8        | 59.4        |
| 35 to 39                                | 49.7  | 42.1        | 57.0        | 50.2    | 42.5        | 57.5        | 49.9  | 42.2        | 57.2        |
| 40 to 44                                | 47.8  | 40.9        | 55.0        | 48.5    | 41.2        | 55.7        | 48.0  | 41.0        | 55.0        |
| 45 to 49                                | 46.2  | 39.6        | 52.7        | 46.3    | 39.7        | 52.9        | 46.3  | 39.6        | 52.7        |
| 50 to 54                                | 44.3  | 37.7        | 50.5        | 44.7    | 37.9        | 50.9        | 44.5  | 37.8        | 50.6        |
| 55 to 59                                | 42.3  | 36.3        | 48.2        | 42.3    | 36.1        | 48.5        | 42.3  | 36.3        | 48.4        |
| 60 to 64                                | 39.5  | 33.3        | 45.3        | 39.6    | 33.5        | 45.8        | 39.5  | 33.3        | 45.4        |
| 65 to 69                                | 37.4  | 31.9        | 42.4        | 37.0    | 31.4        | 42.4        | 37.2  | 31.8        | 42.2        |

|                         |      |      |      |      |      |      |      |      |      |
|-------------------------|------|------|------|------|------|------|------|------|------|
| 70 to 74                | 35.4 | 30.1 | 40.7 | 34.1 | 28.7 | 39.5 | 34.9 | 29.6 | 40.1 |
| 75 to 79                | 32.4 | 27.7 | 37.4 | 30.5 | 26.1 | 35.4 | 31.5 | 27.0 | 36.4 |
| 80 plus                 | 27.2 | 23.5 | 31.3 | 24.0 | 20.6 | 27.6 | 25.5 | 21.9 | 29.2 |
| <b>Behavioral risks</b> |      |      |      |      |      |      |      |      |      |
| 25 to 29                | 79.8 | 71.4 | 85.7 | 81.1 | 73.4 | 86.6 | 80.2 | 72.1 | 86.0 |
| 30 to 34                | 85.2 | 79.0 | 89.5 | 81.8 | 73.8 | 87.2 | 84.2 | 77.7 | 88.7 |
| 35 to 39                | 86.1 | 80.2 | 90.0 | 81.8 | 74.0 | 87.0 | 84.8 | 78.6 | 89.1 |
| 40 to 44                | 83.3 | 77.4 | 87.5 | 76.9 | 68.7 | 82.6 | 81.4 | 74.8 | 85.8 |
| 45 to 49                | 83.0 | 77.1 | 87.1 | 75.4 | 67.7 | 81.4 | 80.8 | 74.4 | 85.3 |
| 50 to 54                | 82.6 | 77.2 | 86.6 | 72.9 | 64.8 | 78.9 | 79.5 | 73.3 | 84.0 |
| 55 to 59                | 77.6 | 71.5 | 82.4 | 68.3 | 60.1 | 75.0 | 74.6 | 68.0 | 79.9 |
| 60 to 64                | 75.6 | 69.7 | 80.5 | 64.9 | 56.9 | 71.8 | 71.7 | 65.1 | 77.3 |
| 65 to 69                | 69.6 | 62.9 | 75.0 | 60.7 | 52.7 | 67.7 | 66.0 | 58.9 | 72.2 |
| 70 to 74                | 66.6 | 60.4 | 72.2 | 57.6 | 50.1 | 64.4 | 62.7 | 55.6 | 68.8 |
| 75 to 79                | 60.8 | 53.6 | 67.3 | 53.9 | 46.0 | 60.7 | 57.5 | 50.1 | 64.1 |
| 80 plus                 | 59.3 | 51.9 | 65.8 | 54.3 | 46.6 | 61.2 | 56.5 | 49.1 | 63.2 |

\* PAF: population attributable fraction

**Table S15. PAF\* of IHD deaths by age and sex in upper-middle income countries in 2019**

|                                         | males                  |             |             | females |             |             | both  |             |             |
|-----------------------------------------|------------------------|-------------|-------------|---------|-------------|-------------|-------|-------------|-------------|
|                                         | value                  | lower limit | upper limit | value   | lower limit | upper limit | value | lower limit | upper limit |
|                                         | <b>Metabolic risks</b> |             |             |         |             |             |       |             |             |
| 25 to 29                                | 93.5                   | 86.1        | 98.3        | 91.3    | 82.5        | 97.5        | 93.0  | 85.7        | 98.0        |
| 30 to 34                                | 93.7                   | 87.2        | 97.7        | 91.8    | 84.5        | 97.1        | 93.3  | 86.9        | 97.4        |
| 35 to 39                                | 93.5                   | 88.7        | 97.1        | 92.5    | 87.1        | 96.4        | 93.3  | 88.5        | 96.8        |
| 40 to 44                                | 92.8                   | 87.1        | 96.4        | 92.2    | 86.4        | 96.3        | 92.6  | 87.1        | 96.2        |
| 45 to 49                                | 92.4                   | 87.3        | 96.0        | 92.4    | 86.9        | 96.3        | 92.4  | 87.3        | 95.9        |
| 50 to 54                                | 91.1                   | 86.0        | 95.3        | 91.6    | 85.8        | 95.9        | 91.2  | 86.4        | 95.0        |
| 55 to 59                                | 90.0                   | 84.6        | 94.2        | 90.9    | 85.5        | 94.9        | 90.2  | 85.4        | 94.1        |
| 60 to 64                                | 87.6                   | 81.9        | 92.6        | 89.0    | 83.1        | 93.8        | 88.1  | 82.8        | 92.7        |
| 65 to 69                                | 83.3                   | 74.6        | 90.0        | 85.4    | 77.3        | 92.1        | 84.1  | 76.2        | 90.5        |
| 70 to 74                                | 80.0                   | 70.0        | 88.1        | 82.2    | 72.2        | 90.3        | 80.9  | 72.1        | 88.4        |
| 75 to 79                                | 79.6                   | 70.5        | 87.4        | 82.4    | 73.6        | 90.1        | 80.9  | 72.7        | 88.4        |
| 80 plus                                 | 77.1                   | 65.1        | 87.5        | 79.3    | 67.3        | 88.7        | 78.4  | 67.0        | 88.1        |
| <b>Environmental/occupational risks</b> |                        |             |             |         |             |             |       |             |             |
| 25 to 29                                | 44.8                   | 37.0        | 52.1        | 46.1    | 38.2        | 53.7        | 45.2  | 37.4        | 52.4        |
| 30 to 34                                | 43.3                   | 36.1        | 51.3        | 44.2    | 36.9        | 51.7        | 43.6  | 36.4        | 51.3        |
| 35 to 39                                | 40.5                   | 33.2        | 48.1        | 40.4    | 33.4        | 48.0        | 40.5  | 33.3        | 48.1        |
| 40 to 44                                | 39.2                   | 32.5        | 46.6        | 38.9    | 32.2        | 46.0        | 39.1  | 32.3        | 46.5        |
| 45 to 49                                | 37.7                   | 31.6        | 44.3        | 37.8    | 31.5        | 44.1        | 37.7  | 31.7        | 44.2        |
| 50 to 54                                | 36.6                   | 30.3        | 43.2        | 36.8    | 30.6        | 43.1        | 36.7  | 30.3        | 43.2        |
| 55 to 59                                | 33.8                   | 28.1        | 40.1        | 33.8    | 28.2        | 40.0        | 33.8  | 28.2        | 40.0        |
| 60 to 64                                | 31.6                   | 26.1        | 37.0        | 31.5    | 25.8        | 36.9        | 31.6  | 26.1        | 37.1        |
| 65 to 69                                | 31.3                   | 25.9        | 36.2        | 30.5    | 25.0        | 35.5        | 31.0  | 25.6        | 35.7        |
| 70 to 74                                | 30.6                   | 25.6        | 35.7        | 29.0    | 23.9        | 34.2        | 29.9  | 24.9        | 35.0        |

|          |      |      |      |      |      |      |      |      |      |
|----------|------|------|------|------|------|------|------|------|------|
| 75 to 79 | 29.2 | 24.9 | 33.7 | 26.7 | 22.4 | 31.3 | 28.0 | 23.8 | 32.6 |
| 80 plus  | 25.4 | 22.0 | 29.2 | 22.0 | 18.8 | 25.6 | 23.4 | 20.2 | 27.1 |

---

**Behavioral risks**

|          |      |      |      |      |      |      |      |      |      |
|----------|------|------|------|------|------|------|------|------|------|
| 25 to 29 | 79.3 | 69.9 | 85.3 | 80.8 | 72.5 | 86.3 | 79.7 | 70.6 | 85.6 |
| 30 to 34 | 88.0 | 82.8 | 91.5 | 83.5 | 76.1 | 88.2 | 87.0 | 81.4 | 90.7 |
| 35 to 39 | 89.1 | 84.2 | 92.1 | 83.7 | 77.1 | 88.3 | 87.9 | 82.8 | 91.2 |
| 40 to 44 | 86.9 | 82.4 | 90.3 | 79.4 | 72.2 | 84.6 | 85.3 | 80.2 | 88.9 |
| 45 to 49 | 86.9 | 82.5 | 90.3 | 78.5 | 71.3 | 83.8 | 84.9 | 80.1 | 88.7 |
| 50 to 54 | 86.2 | 81.7 | 89.6 | 77.2 | 69.9 | 82.6 | 83.9 | 78.8 | 87.8 |
| 55 to 59 | 82.3 | 77.1 | 86.4 | 72.7 | 65.5 | 79.0 | 79.6 | 74.1 | 84.1 |
| 60 to 64 | 80.6 | 75.3 | 84.9 | 69.7 | 62.1 | 76.0 | 77.1 | 71.3 | 81.9 |
| 65 to 69 | 75.8 | 69.7 | 81.3 | 64.9 | 57.0 | 72.1 | 71.7 | 65.0 | 77.6 |
| 70 to 74 | 72.5 | 66.5 | 77.9 | 60.8 | 52.7 | 68.6 | 67.5 | 61.0 | 73.6 |
| 75 to 79 | 65.4 | 58.3 | 72.1 | 56.1 | 48.6 | 63.5 | 61.1 | 53.8 | 68.0 |
| 80 plus  | 60.7 | 53.4 | 67.9 | 55.1 | 47.4 | 62.4 | 57.4 | 50.1 | 64.5 |

---

\* PAF: population attributable fraction

**Table S16. PAF\* of IHD DALYs<sup>§</sup> by age and sex in low-income countries in 2019**

|                                         | males |             |             | females |             |             | both  |             |             |
|-----------------------------------------|-------|-------------|-------------|---------|-------------|-------------|-------|-------------|-------------|
|                                         | value | lower limit | upper limit | value   | lower limit | upper limit | value | lower limit | upper limit |
| <b>Metabolic risks</b>                  |       |             |             |         |             |             |       |             |             |
| 25 to 29                                | 88.1  | 77.6        | 95.5        | 86.9    | 76.6        | 94.6        | 87.7  | 77.6        | 95.0        |
| 30 to 34                                | 87.9  | 79.2        | 94.6        | 87.8    | 79.1        | 94.6        | 87.9  | 79.3        | 94.3        |
| 35 to 39                                | 87.3  | 80.0        | 93.0        | 87.8    | 80.4        | 93.3        | 87.4  | 80.4        | 93.0        |
| 40 to 44                                | 86.5  | 79.2        | 92.2        | 87.8    | 80.6        | 93.0        | 87.0  | 79.8        | 92.3        |
| 45 to 49                                | 86.6  | 79.8        | 92.0        | 88.6    | 82.2        | 93.4        | 87.3  | 80.8        | 92.4        |
| 50 to 54                                | 85.6  | 79.4        | 91.0        | 88.1    | 82.3        | 92.6        | 86.5  | 80.6        | 91.5        |
| 55 to 59                                | 83.9  | 78.1        | 89.2        | 86.4    | 80.7        | 91.3        | 84.8  | 79.3        | 89.9        |
| 60 to 64                                | 81.5  | 75.0        | 87.2        | 84.3    | 78.5        | 89.6        | 82.6  | 76.4        | 88.0        |
| 65 to 69                                | 78.4  | 69.7        | 85.9        | 80.3    | 71.5        | 87.1        | 79.2  | 70.5        | 86.5        |
| 70 to 74                                | 75.4  | 64.9        | 84.2        | 76.7    | 67.0        | 85.1        | 76.0  | 66.3        | 84.4        |
| 75 to 79                                | 75.5  | 66.6        | 84.1        | 76.6    | 68.0        | 84.7        | 76.1  | 67.8        | 84.5        |
| 80 plus                                 | 72.9  | 59.9        | 85.8        | 74.1    | 62.0        | 86.1        | 73.6  | 61.2        | 85.6        |
| <b>Environmental/occupational risks</b> |       |             |             |         |             |             |       |             |             |
| 25 to 29                                | 59.1  | 50.6        | 66.6        | 59.4    | 50.9        | 67.7        | 59.2  | 50.7        | 67.2        |
| 30 to 34                                | 57.6  | 49.1        | 65.3        | 58.0    | 49.1        | 66.6        | 57.7  | 49.1        | 65.6        |
| 35 to 39                                | 55.7  | 47.4        | 63.4        | 56.0    | 47.3        | 64.6        | 55.8  | 47.4        | 63.7        |
| 40 to 44                                | 54.2  | 45.7        | 61.9        | 54.3    | 45.2        | 63.4        | 54.2  | 45.5        | 62.4        |
| 45 to 49                                | 52.7  | 44.9        | 60.4        | 52.8    | 44.1        | 61.4        | 52.7  | 44.7        | 60.9        |
| 50 to 54                                | 50.5  | 42.8        | 58.2        | 50.3    | 41.9        | 59.9        | 50.4  | 42.5        | 58.9        |
| 55 to 59                                | 48.5  | 41.1        | 57.2        | 48.4    | 40.1        | 59.6        | 48.4  | 40.7        | 58.1        |
| 60 to 64                                | 46.0  | 38.5        | 54.2        | 45.6    | 37.2        | 56.7        | 45.8  | 38.1        | 55.3        |
| 65 to 69                                | 43.7  | 36.8        | 52.5        | 43.2    | 35.5        | 55.5        | 43.5  | 36.4        | 54.0        |



|                         |      |      |      |      |      |      |      |      |      |
|-------------------------|------|------|------|------|------|------|------|------|------|
| 70 to 74                | 41.4 | 34.1 | 50.6 | 40.9 | 32.2 | 53.6 | 41.2 | 33.3 | 52.0 |
| 75 to 79                | 38.5 | 31.9 | 47.6 | 37.5 | 29.9 | 49.1 | 37.9 | 30.8 | 48.1 |
| 80 plus                 | 33.7 | 28.6 | 40.1 | 31.9 | 26.8 | 39.6 | 32.7 | 27.7 | 39.9 |
| <b>Behavioral risks</b> |      |      |      |      |      |      |      |      |      |
| 25 to 29                | 78.3 | 69.3 | 84.4 | 80.0 | 71.5 | 85.8 | 78.9 | 70.2 | 84.9 |
| 30 to 34                | 81.8 | 74.4 | 86.8 | 80.3 | 71.5 | 85.9 | 81.3 | 73.4 | 86.4 |
| 35 to 39                | 82.7 | 75.5 | 87.3 | 79.8 | 71.1 | 85.4 | 81.8 | 74.4 | 86.6 |
| 40 to 44                | 79.1 | 72.0 | 84.1 | 74.5 | 65.6 | 80.4 | 77.5 | 69.9 | 82.7 |
| 45 to 49                | 79.3 | 72.3 | 83.9 | 74.2 | 65.7 | 80.4 | 77.5 | 70.0 | 82.5 |
| 50 to 54                | 77.3 | 70.5 | 82.1 | 71.3 | 63.0 | 77.6 | 75.1 | 67.7 | 80.3 |
| 55 to 59                | 71.9 | 64.8 | 77.6 | 66.1 | 57.3 | 73.3 | 69.8 | 62.0 | 76.0 |
| 60 to 64                | 68.9 | 61.6 | 75.5 | 62.2 | 53.7 | 69.8 | 66.3 | 58.9 | 73.2 |
| 65 to 69                | 64.3 | 56.7 | 71.3 | 58.6 | 50.2 | 66.8 | 61.8 | 54.0 | 69.5 |
| 70 to 74                | 61.0 | 53.6 | 68.1 | 55.4 | 47.5 | 63.3 | 58.3 | 50.7 | 65.7 |
| 75 to 79                | 56.1 | 48.2 | 63.9 | 51.7 | 44.0 | 59.8 | 53.8 | 46.0 | 62.0 |
| 80 plus                 | 55.3 | 47.5 | 62.9 | 51.9 | 44.0 | 59.5 | 53.3 | 45.6 | 60.8 |

\* PAF: population attributable fraction

§ DALY: disability adjusted life years

**Table S17. PAF\* of IHD DALYs<sup>§</sup> by age and sex in lower-middle income countries in 2019**

|                        | males |             |             | females |             |             | both  |             |             |
|------------------------|-------|-------------|-------------|---------|-------------|-------------|-------|-------------|-------------|
|                        | value | lower limit | upper limit | value   | lower limit | upper limit | value | lower limit | upper limit |
| <b>Metabolic risks</b> |       |             |             |         |             |             |       |             |             |
| 25 to 29               | 90.6  | 81.5        | 96.8        | 87.5    | 77.9        | 94.9        | 89.6  | 80.4        | 96.0        |
| 30 to 34               | 90.7  | 83.4        | 95.9        | 88.9    | 80.8        | 94.6        | 90.2  | 82.8        | 95.5        |
| 35 to 39               | 90.3  | 84.4        | 94.8        | 89.6    | 83.5        | 94.2        | 90.1  | 84.3        | 94.6        |
| 40 to 44               | 89.3  | 83.2        | 93.8        | 89.2    | 83.4        | 93.8        | 89.3  | 83.3        | 93.8        |
| 45 to 49               | 89.2  | 83.5        | 93.7        | 89.7    | 84.2        | 93.9        | 89.3  | 83.7        | 93.6        |
| 50 to 54               | 88.4  | 83.1        | 92.8        | 89.6    | 84.6        | 93.4        | 88.7  | 83.7        | 93.0        |
| 55 to 59               | 87.7  | 82.7        | 92.2        | 89.2    | 85.1        | 93.1        | 88.2  | 83.4        | 92.4        |
| 60 to 64               | 86.0  | 80.5        | 90.9        | 87.9    | 83.1        | 92.2        | 86.7  | 81.4        | 91.4        |
| 65 to 69               | 82.4  | 74.5        | 89.4        | 84.7    | 77.8        | 90.6        | 83.3  | 75.7        | 89.9        |
| 70 to 74               | 79.4  | 70.0        | 87.5        | 82.2    | 73.7        | 89.3        | 80.6  | 71.6        | 88.4        |
| 75 to 79               | 79.5  | 71.1        | 87.4        | 82.5    | 75.6        | 89.4        | 80.9  | 73.3        | 88.4        |
| 80 plus                | 77.4  | 64.7        | 89.5        | 80.4    | 68.4        | 90.6        | 79.0  | 66.8        | 89.9        |

**Environmental/occupational risks**

|          |      |      |      |      |      |      |      |      |      |
|----------|------|------|------|------|------|------|------|------|------|
| 25 to 29 | 52.9 | 45.1 | 60.0 | 54.2 | 46.5 | 61.3 | 53.3 | 45.6 | 60.5 |
| 30 to 34 | 51.8 | 43.5 | 59.2 | 52.2 | 44.1 | 59.6 | 51.9 | 43.7 | 59.4 |
| 35 to 39 | 49.7 | 42.0 | 57.0 | 50.2 | 42.4 | 57.5 | 49.8 | 42.2 | 57.2 |
| 40 to 44 | 47.7 | 40.9 | 54.9 | 48.5 | 41.1 | 55.7 | 48.0 | 40.9 | 55.0 |
| 45 to 49 | 46.2 | 39.6 | 52.7 | 46.3 | 39.6 | 52.9 | 46.2 | 39.6 | 52.7 |
| 50 to 54 | 44.3 | 37.6 | 50.5 | 44.6 | 37.8 | 50.9 | 44.4 | 37.8 | 50.6 |
| 55 to 59 | 42.2 | 36.3 | 48.2 | 42.3 | 36.0 | 48.4 | 42.3 | 36.2 | 48.3 |
| 60 to 64 | 39.4 | 33.2 | 45.3 | 39.5 | 33.4 | 45.7 | 39.5 | 33.2 | 45.4 |
| 65 to 69 | 37.3 | 31.8 | 42.3 | 36.9 | 31.3 | 42.3 | 37.2 | 31.7 | 42.2 |
| 70 to 74 | 35.3 | 30.0 | 40.6 | 34.1 | 28.7 | 39.5 | 34.8 | 29.5 | 40.1 |
| 75 to 79 | 32.4 | 27.7 | 37.3 | 30.5 | 26.0 | 35.3 | 31.5 | 26.9 | 36.3 |
| 80 plus  | 27.6 | 23.6 | 31.8 | 24.6 | 21.2 | 28.4 | 25.9 | 22.4 | 29.9 |

**Behavioral risks**

|          |      |      |      |      |      |      |      |      |      |
|----------|------|------|------|------|------|------|------|------|------|
| 25 to 29 | 79.8 | 71.4 | 85.6 | 81.1 | 73.4 | 86.5 | 80.2 | 72.0 | 85.9 |
| 30 to 34 | 85.2 | 79.0 | 89.5 | 81.7 | 73.8 | 87.1 | 84.2 | 77.7 | 88.7 |
| 35 to 39 | 86.0 | 80.2 | 90.0 | 81.7 | 73.9 | 86.9 | 84.8 | 78.6 | 89.1 |
| 40 to 44 | 83.3 | 77.4 | 87.5 | 76.8 | 68.7 | 82.6 | 81.3 | 74.7 | 85.8 |

|          |      |      |      |      |      |      |      |      |      |
|----------|------|------|------|------|------|------|------|------|------|
| 45 to 49 | 83.0 | 77.1 | 87.1 | 75.3 | 67.6 | 81.3 | 80.7 | 74.3 | 85.3 |
| 50 to 54 | 82.6 | 77.2 | 86.6 | 72.8 | 64.8 | 78.8 | 79.5 | 73.2 | 84.0 |
| 55 to 59 | 77.6 | 71.5 | 82.4 | 68.3 | 60.0 | 75.0 | 74.6 | 68.0 | 79.8 |
| 60 to 64 | 75.5 | 69.7 | 80.5 | 64.8 | 56.8 | 71.8 | 71.6 | 65.0 | 77.2 |
| 65 to 69 | 69.5 | 62.9 | 75.0 | 60.7 | 52.6 | 67.6 | 66.0 | 58.8 | 72.1 |
| 70 to 74 | 66.6 | 60.4 | 72.2 | 57.6 | 50.1 | 64.4 | 62.7 | 55.6 | 68.8 |
| 75 to 79 | 60.8 | 53.6 | 67.2 | 53.8 | 46.0 | 60.7 | 57.4 | 50.0 | 64.0 |
| 80 plus  | 59.6 | 52.3 | 66.1 | 54.3 | 46.6 | 61.3 | 56.8 | 49.5 | 63.4 |

---

\* PAF: population attributable fraction

§ DALY: disability adjusted life years

**Table S18. PAF\* of IHD DALYs<sup>§</sup> by age and sex in upper-middle income countries in 2019**

|                        | males |             |             | females |             |             | both  |             |             |
|------------------------|-------|-------------|-------------|---------|-------------|-------------|-------|-------------|-------------|
|                        | value | lower limit | upper limit | value   | lower limit | upper limit | value | lower limit | upper limit |
| <b>Metabolic risks</b> |       |             |             |         |             |             |       |             |             |
| 25 to 29               | 93.5  | 86.1        | 98.3        | 91.2    | 82.4        | 97.4        | 92.9  | 85.7        | 98.0        |
| 30 to 34               | 93.7  | 87.2        | 97.7        | 91.7    | 84.4        | 97.1        | 93.2  | 86.9        | 97.4        |
| 35 to 39               | 93.5  | 88.7        | 97.1        | 92.4    | 86.9        | 96.4        | 93.3  | 88.4        | 96.8        |
| 40 to 44               | 92.7  | 87.0        | 96.4        | 92.1    | 86.2        | 96.3        | 92.6  | 87.0        | 96.2        |
| 45 to 49               | 92.3  | 87.2        | 96.0        | 92.3    | 86.6        | 96.2        | 92.3  | 87.3        | 95.9        |
| 50 to 54               | 91.0  | 86.0        | 95.2        | 91.5    | 85.6        | 95.9        | 91.1  | 86.3        | 95.0        |
| 55 to 59               | 89.9  | 84.5        | 94.1        | 90.8    | 85.2        | 94.9        | 90.2  | 85.3        | 94.0        |
| 60 to 64               | 87.6  | 81.8        | 92.5        | 88.9    | 82.8        | 93.8        | 88.0  | 82.6        | 92.7        |
| 65 to 69               | 83.2  | 74.6        | 90.0        | 85.3    | 77.1        | 92.1        | 84.0  | 76.1        | 90.5        |
| 70 to 74               | 79.9  | 70.0        | 88.1        | 82.1    | 72.1        | 90.3        | 80.9  | 72.1        | 88.4        |
| 75 to 79               | 79.6  | 70.5        | 87.4        | 82.3    | 73.5        | 90.2        | 80.9  | 72.6        | 88.3        |
| 80 plus                | 77.1  | 65.0        | 87.6        | 79.3    | 67.7        | 89.0        | 78.4  | 67.0        | 88.1        |

**Environmental/occupational risks**

|          |      |      |      |      |      |      |      |      |      |
|----------|------|------|------|------|------|------|------|------|------|
| 25 to 29 | 44.8 | 37.0 | 52.1 | 46.1 | 38.1 | 53.7 | 45.1 | 37.4 | 52.4 |
| 30 to 34 | 43.3 | 36.1 | 51.3 | 44.2 | 36.9 | 51.7 | 43.5 | 36.4 | 51.3 |
| 35 to 39 | 40.5 | 33.2 | 48.1 | 40.5 | 33.4 | 48.1 | 40.5 | 33.3 | 48.1 |
| 40 to 44 | 39.1 | 32.5 | 46.6 | 38.9 | 32.3 | 46.0 | 39.1 | 32.3 | 46.5 |
| 45 to 49 | 37.7 | 31.7 | 44.3 | 37.8 | 31.5 | 44.1 | 37.7 | 31.7 | 44.2 |
| 50 to 54 | 36.6 | 30.2 | 43.2 | 36.8 | 30.4 | 43.1 | 36.6 | 30.3 | 43.2 |
| 55 to 59 | 33.8 | 28.1 | 40.0 | 33.8 | 28.3 | 40.0 | 33.8 | 28.2 | 39.9 |
| 60 to 64 | 31.6 | 26.1 | 37.0 | 31.4 | 25.8 | 36.9 | 31.6 | 26.1 | 37.0 |
| 65 to 69 | 31.2 | 25.9 | 36.1 | 30.3 | 24.9 | 35.3 | 30.8 | 25.5 | 35.6 |
| 70 to 74 | 30.4 | 25.4 | 35.6 | 28.8 | 23.7 | 34.0 | 29.7 | 24.7 | 34.9 |
| 75 to 79 | 29.0 | 24.7 | 33.5 | 26.5 | 22.3 | 31.1 | 27.8 | 23.6 | 32.3 |
| 80 plus  | 25.7 | 22.2 | 29.5 | 22.3 | 19.1 | 26.0 | 23.8 | 20.5 | 27.6 |

**Behavioral risks**

|          |      |      |      |      |      |      |      |      |      |
|----------|------|------|------|------|------|------|------|------|------|
| 25 to 29 | 79.3 | 69.8 | 85.3 | 80.6 | 72.4 | 86.2 | 79.6 | 70.5 | 85.5 |
| 30 to 34 | 88.0 | 82.8 | 91.5 | 83.3 | 75.9 | 88.1 | 86.9 | 81.3 | 90.6 |
| 35 to 39 | 89.0 | 84.2 | 92.1 | 83.5 | 76.9 | 88.2 | 87.9 | 82.6 | 91.2 |
| 40 to 44 | 86.9 | 82.3 | 90.3 | 79.1 | 71.9 | 84.4 | 85.2 | 80.0 | 88.9 |

|          |      |      |      |      |      |      |      |      |      |
|----------|------|------|------|------|------|------|------|------|------|
| 45 to 49 | 86.9 | 82.5 | 90.3 | 78.2 | 71.0 | 83.5 | 84.8 | 80.0 | 88.6 |
| 50 to 54 | 86.2 | 81.7 | 89.6 | 76.9 | 69.5 | 82.3 | 83.8 | 78.7 | 87.7 |
| 55 to 59 | 82.3 | 77.1 | 86.4 | 72.4 | 65.2 | 78.8 | 79.5 | 74.0 | 84.0 |
| 60 to 64 | 80.6 | 75.3 | 84.9 | 69.5 | 62.0 | 75.8 | 76.9 | 71.1 | 81.8 |
| 65 to 69 | 75.8 | 69.7 | 81.3 | 64.7 | 56.8 | 71.9 | 71.5 | 64.9 | 77.5 |
| 70 to 74 | 72.4 | 66.4 | 77.9 | 60.6 | 52.5 | 68.5 | 67.4 | 60.8 | 73.6 |
| 75 to 79 | 65.4 | 58.2 | 72.0 | 56.0 | 48.5 | 63.5 | 61.0 | 53.8 | 67.9 |
| 80 plus  | 61.2 | 54.1 | 68.4 | 55.3 | 47.6 | 62.6 | 57.8 | 50.7 | 64.9 |

---

\* PAF: population attributable fraction

§ DALY: disability adjusted life years

Table S19. PAF\* of IHD DALYs§ for modifiable risk factors in 31 low-income countries in 2019

|                                          | a    | b    | c    | d    | e    | f    | g    | h    | i    | j    | k    | l    | m    | n    | o    | p    | q    | r    | s    | t    | u    | v    | w    | x    | y    | z    | ab   | ac   | ad   | ae   | af   |
|------------------------------------------|------|------|------|------|------|------|------|------|------|------|------|------|------|------|------|------|------|------|------|------|------|------|------|------|------|------|------|------|------|------|------|
| Air pollution                            |      |      |      |      |      |      |      |      |      |      |      |      |      |      |      |      |      |      |      |      |      |      |      |      |      |      |      |      |      |      |      |
| value                                    | 34.9 | 28.9 | 36.8 | 23.2 | 32.2 | 39.5 | 37.1 | 42.6 | 38.5 | 40.8 | 37.4 | 37.8 | 39.6 | 38.1 | 39.0 | 37.1 | 47.5 | 36.1 | 37.2 | 37.5 | 40.1 | 40.6 | 37.2 | 38.8 | 40.5 | 38.6 | 39.5 | 43.5 | 38.8 | 38.1 | 38.1 |
| lower limit                              | 31.8 | 21.9 | 33.6 | 19.3 | 26.5 | 35.5 | 34.2 | 38.2 | 35.1 | 36.7 | 33.6 | 34.0 | 36.3 | 34.8 | 35.2 | 34.0 | 39.4 | 33.1 | 34.0 | 34.1 | 35.6 | 35.7 | 34.0 | 34.8 | 36.8 | 35.1 | 34.5 | 36.6 | 35.1 | 34.9 | 34.8 |
| upper limit                              | 38.1 | 35.2 | 40.2 | 27.2 | 37.8 | 44.1 | 40.4 | 48.8 | 42.5 | 47.0 | 41.4 | 42.8 | 42.9 | 41.9 | 44.3 | 40.5 | 61.5 | 39.4 | 40.6 | 41.6 | 47.3 | 48.1 | 41.1 | 44.2 | 45.3 | 42.8 | 46.9 | 54.6 | 43.9 | 41.6 | 41.9 |
| Ambient particulate matter pollution     |      |      |      |      |      |      |      |      |      |      |      |      |      |      |      |      |      |      |      |      |      |      |      |      |      |      |      |      |      |      |      |
| value                                    | 14.7 | 18.9 | 5.1  | 23.1 | 17.9 | 9.8  | 17.6 | 5.5  | 6.6  | 4.0  | 10.5 | 5.5  | 4.2  | 4.1  | 3.0  | 7.6  | 1.4  | 5.6  | 6.9  | 7.7  | 5.4  | 5.3  | 9.6  | 6.3  | 7.7  | 7.9  | 5.3  | 4.7  | 6.8  | 9.9  | 6.5  |
| lower limit                              | 9.4  | 10.1 | 1.9  | 19.2 | 9.4  | 4.4  | 11.1 | 1.7  | 2.7  | 1.4  | 4.7  | 2.8  | 1.9  | 1.7  | 1.3  | 3.3  | 0.3  | 2.8  | 3.5  | 3.6  | 1.9  | 2.0  | 4.8  | 2.7  | 3.3  | 3.8  | 1.9  | 1.3  | 3.0  | 4.9  | 2.8  |
| upper limit                              | 20.7 | 27.7 | 10.2 | 27.2 | 26.3 | 17.4 | 24.1 | 11.9 | 12.0 | 8.8  | 18.4 | 9.5  | 7.6  | 7.7  | 6.2  | 13.6 | 4.3  | 9.6  | 12.0 | 13.5 | 11.1 | 11.4 | 16.1 | 12.0 | 13.9 | 14.0 | 11.0 | 11.6 | 12.4 | 15.9 | 12.0 |
| Household air pollution from solid fuels |      |      |      |      |      |      |      |      |      |      |      |      |      |      |      |      |      |      |      |      |      |      |      |      |      |      |      |      |      |      |      |
| value                                    | 20.2 | 10.0 | 31.7 | 0.0  | 14.4 | 29.7 | 19.5 | 37.1 | 31.9 | 36.8 | 26.9 | 32.3 | 35.4 | 34.0 | 36.0 | 29.5 | 46.1 | 30.5 | 30.3 | 29.8 | 34.8 | 35.2 | 27.6 | 32.6 | 32.8 | 30.6 | 34.2 | 38.8 | 32.0 | 28.2 | 31.5 |
| lower limit                              | 14.0 | 5.4  | 26.4 | 0.0  | 8.7  | 22.1 | 12.7 | 29.0 | 25.5 | 29.6 | 19.6 | 26.3 | 30.3 | 28.6 | 30.6 | 22.5 | 35.5 | 25.1 | 24.5 | 23.0 | 26.2 | 26.6 | 20.8 | 25.3 | 24.8 | 23.4 | 25.7 | 27.5 | 24.9 | 21.6 | 25.0 |
| upper limit                              | 26.2 | 15.5 | 36.4 | 0.1  | 20.9 | 37.0 | 26.7 | 45.6 | 37.8 | 44.8 | 33.6 | 39.2 | 40.1 | 39.5 | 42.5 | 35.4 | 60.9 | 35.5 | 36.0 | 36.3 | 44.0 | 44.8 | 34.3 | 40.6 | 40.1 | 37.5 | 43.6 | 51.8 | 39.3 | 34.7 | 37.9 |
| Other environmental risks                |      |      |      |      |      |      |      |      |      |      |      |      |      |      |      |      |      |      |      |      |      |      |      |      |      |      |      |      |      |      |      |
| value                                    | 3.3  | 5.2  | 8.1  | 5.4  | 11.2 | 12.1 | 7.3  | 4.5  | 3.8  | 3.8  | 3.1  | 5.4  | 3.3  | 4.3  | 5.8  | 3.4  | 6.0  | 3.6  | 3.9  | 4.5  | 5.9  | 5.9  | 4.0  | 4.9  | 4.4  | 4.5  | 5.7  | 6.9  | 4.1  | 3.1  | 4.4  |
| lower limit                              | 1.4  | 3.0  | 5.5  | 3.1  | 8.2  | 9.1  | 5.0  | 2.3  | 1.8  | 1.9  | 1.2  | 3.3  | 1.4  | 2.1  | 3.5  | 1.4  | 3.7  | 1.7  | 2.0  | 2.4  | 3.7  | 3.7  | 1.9  | 2.8  | 2.3  | 2.4  | 3.5  | 4.6  | 2.1  | 1.1  | 2.3  |
| upper limit                              | 5.4  | 7.6  | 10.8 | 7.7  | 14.0 | 15.2 | 10.0 | 6.8  | 5.9  | 6.0  | 5.2  | 7.8  | 5.4  | 6.4  | 8.1  | 5.5  | 8.4  | 5.7  | 6.1  | 6.7  | 8.2  | 8.2  | 6.1  | 7.2  | 6.7  | 6.7  | 8.0  | 9.4  | 6.2  | 5.2  | 6.6  |
| Lead exposure                            |      |      |      |      |      |      |      |      |      |      |      |      |      |      |      |      |      |      |      |      |      |      |      |      |      |      |      |      |      |      |      |
| value                                    | 3.3  | 5.2  | 8.1  | 5.4  | 11.2 | 12.1 | 7.3  | 4.5  | 3.8  | 3.8  | 3.1  | 5.4  | 3.3  | 4.3  | 5.8  | 3.4  | 6.0  | 3.6  | 3.9  | 4.5  | 5.9  | 5.9  | 4.0  | 4.9  | 4.4  | 4.5  | 5.7  | 6.9  | 4.1  | 3.1  | 4.4  |
| lower limit                              | 1.4  | 3.0  | 5.5  | 3.1  | 8.2  | 9.1  | 5.0  | 2.3  | 1.8  | 1.9  | 1.2  | 3.3  | 1.4  | 2.1  | 3.5  | 1.4  | 3.7  | 1.7  | 2.0  | 2.4  | 3.7  | 3.7  | 1.9  | 2.8  | 2.3  | 2.4  | 3.5  | 4.6  | 2.1  | 1.1  | 2.3  |
| upper limit                              | 5.4  | 7.6  | 10.8 | 7.7  | 14.0 | 15.2 | 10.0 | 6.8  | 5.9  | 6.0  | 5.2  | 7.8  | 5.4  | 6.4  | 8.1  | 5.5  | 8.4  | 5.7  | 6.1  | 6.7  | 8.2  | 8.2  | 6.1  | 7.2  | 6.7  | 6.7  | 8.0  | 9.4  | 6.2  | 5.2  | 6.6  |
| Tobacco                                  |      |      |      |      |      |      |      |      |      |      |      |      |      |      |      |      |      |      |      |      |      |      |      |      |      |      |      |      |      |      |      |
| value                                    | 33.0 | 25.0 | 13.4 | 33.4 | 37.1 | 23.3 | 29.3 | 16.2 | 11.7 | 14.3 | 15.7 | 6.9  | 16.0 | 18.2 | 17.2 | 22.8 | 17.4 | 23.8 | 13.4 | 13.7 | 13.4 | 14.9 | 19.1 | 19.6 | 12.3 | 13.3 | 12.7 | 10.5 | 20.3 | 20.4 | 16.4 |
| lower limit                              | 30.3 | 23.0 | 12.0 | 31.4 | 34.9 | 21.0 | 27.3 | 14.0 | 10.0 | 12.2 | 13.2 | 6.1  | 14.0 | 15.6 | 15.1 | 19.7 | 14.7 | 21.6 | 11.4 | 12.1 | 11.7 | 12.7 | 17.2 | 17.4 | 11.0 | 11.7 | 11.1 | 9.1  | 18.2 | 18.3 | 13.7 |



|  |                              |      |      |      |      |      |      |      |      |      |      |      |      |      |      |      |      |      |      |      |      |      |      |      |      |      |      |      |      |      |      |      |
|--|------------------------------|------|------|------|------|------|------|------|------|------|------|------|------|------|------|------|------|------|------|------|------|------|------|------|------|------|------|------|------|------|------|------|
|  | upper limit                  | 35.8 | 27.3 | 14.9 | 35.5 | 39.6 | 25.7 | 31.2 | 18.7 | 13.5 | 16.5 | 18.3 | 7.9  | 17.9 | 21.0 | 19.5 | 26.1 | 20.2 | 26.0 | 15.5 | 15.5 | 15.1 | 17.4 | 20.9 | 21.8 | 13.7 | 15.0 | 14.4 | 11.9 | 22.5 | 22.4 | 19.1 |
|  | Smoking                      |      |      |      |      |      |      |      |      |      |      |      |      |      |      |      |      |      |      |      |      |      |      |      |      |      |      |      |      |      |      |      |
|  | value                        | 27.9 | 21.1 | 11.0 | 28.6 | 31.8 | 16.8 | 25.7 | 13.4 | 10.0 | 12.2 | 12.8 | 5.4  | 12.9 | 15.7 | 14.7 | 20.4 | 14.3 | 21.1 | 11.0 | 10.9 | 10.2 | 11.9 | 14.5 | 16.3 | 8.4  | 10.7 | 9.7  | 7.3  | 16.3 | 17.2 | 13.6 |
|  | lower limit                  | 25.1 | 19.1 | 9.7  | 26.8 | 29.5 | 14.9 | 23.9 | 11.3 | 8.3  | 10.2 | 10.4 | 4.6  | 11.0 | 12.9 | 12.7 | 17.2 | 11.5 | 18.8 | 9.1  | 9.4  | 8.7  | 9.7  | 12.8 | 14.2 | 7.4  | 9.3  | 8.2  | 6.2  | 14.3 | 15.2 | 10.9 |
|  | upper limit                  | 30.8 | 23.3 | 12.4 | 30.6 | 34.2 | 18.8 | 27.5 | 15.9 | 11.8 | 14.4 | 15.5 | 6.2  | 14.7 | 18.5 | 17.1 | 23.9 | 17.2 | 23.3 | 13.1 | 12.6 | 12.0 | 14.3 | 16.2 | 18.6 | 9.5  | 12.4 | 11.2 | 8.6  | 18.4 | 19.1 | 16.3 |
|  | Secondhand smoke             |      |      |      |      |      |      |      |      |      |      |      |      |      |      |      |      |      |      |      |      |      |      |      |      |      |      |      |      |      |      |      |
|  | value                        | 6.7  | 5.1  | 2.7  | 6.9  | 7.9  | 7.8  | 4.8  | 3.2  | 1.9  | 2.4  | 3.4  | 1.7  | 3.6  | 3.0  | 2.9  | 3.0  | 3.6  | 3.6  | 2.7  | 3.2  | 3.6  | 3.4  | 5.3  | 3.9  | 4.3  | 2.9  | 3.4  | 3.4  | 4.8  | 3.9  | 3.3  |
|  | lower limit                  | 5.5  | 4.1  | 2.1  | 5.6  | 6.5  | 6.2  | 3.8  | 2.5  | 1.4  | 1.8  | 2.6  | 1.2  | 2.6  | 2.3  | 2.2  | 2.4  | 2.7  | 2.8  | 2.0  | 2.5  | 2.7  | 2.7  | 4.3  | 3.1  | 3.4  | 2.3  | 2.6  | 2.7  | 3.7  | 3.2  | 2.5  |
|  | upper limit                  | 8.0  | 6.1  | 3.4  | 8.3  | 9.4  | 9.5  | 5.9  | 4.1  | 2.5  | 3.1  | 4.2  | 2.1  | 4.6  | 3.7  | 3.8  | 3.7  | 4.5  | 4.4  | 3.4  | 4.0  | 4.5  | 4.3  | 6.5  | 4.8  | 5.3  | 3.7  | 4.3  | 4.2  | 6.0  | 4.9  | 4.1  |
|  | Alcohol use                  |      |      |      |      |      |      |      |      |      |      |      |      |      |      |      |      |      |      |      |      |      |      |      |      |      |      |      |      |      |      |      |
|  | value                        | -1.5 | -1.8 | -0.9 | -0.1 | -0.2 | -0.2 | -2.3 | -4.0 | -3.8 | -1.0 | -3.2 | -3.3 | -3.3 | -1.8 | -4.2 | -2.2 | 0.0  | -0.4 | -0.4 | -1.9 | -3.5 | -1.1 | -1.8 | -1.2 | -1.5 | -1.6 | -0.6 | -1.3 | -1.3 | -1.8 | -1.6 |
|  | lower limit                  | -3.3 | -3.1 | -2.7 | -0.3 | -0.4 | -0.3 | -4.0 | -5.9 | -5.5 | -3.7 | -4.8 | -5.1 | -5.0 | -3.4 | -6.2 | -5.3 | 0.0  | -3.1 | -3.4 | -3.2 | -6.5 | -2.6 | -3.1 | -1.9 | -3.0 | -3.3 | -1.2 | -2.0 | -3.0 | -3.2 | -2.6 |
|  | upper limit                  | 0.4  | -0.4 | 1.0  | 0.2  | 0.1  | -0.1 | -0.3 | -1.9 | -2.0 | 2.0  | -1.6 | -1.3 | -1.5 | -0.2 | -2.1 | 1.2  | 0.0  | 2.5  | 3.0  | -0.4 | 0.1  | 1.0  | -0.3 | -0.5 | 0.3  | 0.4  | 0.1  | -0.7 | 0.7  | -0.3 | -0.7 |
|  | Metabolic risks              |      |      |      |      |      |      |      |      |      |      |      |      |      |      |      |      |      |      |      |      |      |      |      |      |      |      |      |      |      |      |      |
|  | value                        | 78.5 | 84.9 | 87.5 | 87.6 | 83.6 | 86.7 | 78.1 | 82.2 | 81.0 | 76.7 | 75.3 | 67.6 | 79.2 | 83.8 | 83.7 | 72.3 | 75.0 | 84.9 | 77.1 | 82.8 | 73.9 | 78.0 | 84.3 | 80.2 | 82.9 | 85.1 | 77.1 | 79.1 | 84.0 | 83.0 | 79.1 |
|  | lower limit                  | 72.4 | 79.4 | 82.7 | 83.3 | 78.0 | 81.8 | 71.6 | 75.7 | 74.9 | 69.8 | 68.1 | 59.8 | 72.9 | 78.4 | 78.2 | 63.7 | 67.7 | 79.8 | 70.2 | 76.9 | 65.7 | 71.4 | 78.6 | 73.8 | 77.1 | 79.5 | 70.3 | 72.2 | 78.4 | 77.4 | 72.6 |
|  | upper limit                  | 84.7 | 90.4 | 92.0 | 92.0 | 88.7 | 91.0 | 84.5 | 87.5 | 86.7 | 82.7 | 81.9 | 75.3 | 85.0 | 88.7 | 88.4 | 80.0 | 82.0 | 89.5 | 83.5 | 88.3 | 81.7 | 84.4 | 89.4 | 86.0 | 88.3 | 90.0 | 83.6 | 85.6 | 88.8 | 88.0 | 85.4 |
|  | High fasting plasma glucose  |      |      |      |      |      |      |      |      |      |      |      |      |      |      |      |      |      |      |      |      |      |      |      |      |      |      |      |      |      |      |      |
|  | value                        | 15.2 | 29.3 | 33.3 | 30.9 | 20.6 | 29.7 | 20.1 | 21.4 | 20.8 | 13.0 | 13.2 | 11.3 | 11.5 | 19.7 | 17.2 | 18.0 | 13.5 | 14.9 | 18.8 | 22.0 | 21.6 | 18.4 | 19.1 | 18.6 | 18.1 | 23.3 | 19.5 | 17.0 | 11.2 | 10.8 | 14.8 |
|  | lower limit                  | 9.9  | 17.2 | 21.0 | 18.9 | 12.4 | 18.7 | 12.6 | 13.0 | 13.1 | 7.9  | 7.9  | 7.2  | 7.2  | 11.0 | 9.7  | 9.5  | 8.0  | 8.6  | 11.3 | 12.6 | 11.7 | 11.3 | 11.2 | 11.0 | 10.7 | 14.2 | 11.0 | 8.6  | 6.8  | 6.7  | 8.9  |
|  | upper limit                  | 23.6 | 47.0 | 50.2 | 48.1 | 32.0 | 45.0 | 31.5 | 33.5 | 31.4 | 21.0 | 20.9 | 17.3 | 18.0 | 34.0 | 28.9 | 31.6 | 21.6 | 24.4 | 30.1 | 36.4 | 36.4 | 29.4 | 30.7 | 30.8 | 29.2 | 36.6 | 31.8 | 30.8 | 17.6 | 16.3 | 24.3 |
|  | High systolic blood pressure |      |      |      |      |      |      |      |      |      |      |      |      |      |      |      |      |      |      |      |      |      |      |      |      |      |      |      |      |      |      |      |
|  | value                        | 43.8 | 56.8 | 62.5 | 53.3 | 48.7 | 48.7 | 47.5 | 58.6 | 56.0 | 54.5 | 47.6 | 43.0 | 56.4 | 63.5 | 63.4 | 50.1 | 52.1 | 66.5 | 55.2 | 57.6 | 50.8 | 52.2 | 61.9 | 54.7 | 58.9 | 59.9 | 49.0 | 56.2 | 67.0 | 59.2 | 56.1 |
|  | lower limit                  | 35.5 | 48.5 | 54.8 | 44.9 | 39.9 | 39.6 | 39.7 | 49.4 | 48.2 | 45.9 | 39.0 | 35.3 | 47.9 | 55.7 | 55.7 | 41.4 | 43.3 | 58.3 | 47.7 | 49.4 | 42.6 | 43.3 | 53.2 | 46.7 | 50.7 | 51.7 | 40.6 | 47.4 | 59.1 | 51.0 | 47.9 |
|  | upper limit                  | 52.2 | 64.8 | 70.2 | 61.2 | 56.9 | 57.4 | 55.6 | 66.5 | 64.1 | 61.9 | 56.2 | 50.6 | 64.4 | 70.7 | 70.6 | 58.3 | 60.9 | 73.5 | 62.8 | 65.4 | 58.7 | 60.0 | 69.7 | 62.6 | 66.9 | 67.1 | 57.1 | 64.7 | 74.2 | 67.0 | 64.3 |

|                            |      |      |      |      |      |      |      |      |      |      |      |      |      |      |      |      |      |      |      |      |      |      |      |      |      |      |      |      |      |      |      |
|----------------------------|------|------|------|------|------|------|------|------|------|------|------|------|------|------|------|------|------|------|------|------|------|------|------|------|------|------|------|------|------|------|------|
| High body-mass index       |      |      |      |      |      |      |      |      |      |      |      |      |      |      |      |      |      |      |      |      |      |      |      |      |      |      |      |      |      |      |      |
| value                      | 6.6  | 17.3 | 14.2 | 33.8 | 19.3 | 26.7 | 15.7 | 10.8 | 14.8 | 10.3 | 12.4 | 12.9 | 15.5 | 17.8 | 15.9 | 14.9 | 6.5  | 19.7 | 17.5 | 26.2 | 17.2 | 12.6 | 22.8 | 17.2 | 17.7 | 29.6 | 17.6 | 14.1 | 16.5 | 20.5 | 20.9 |
| lower limit                | 1.4  | 9.2  | 7.0  | 22.0 | 10.7 | 16.8 | 8.1  | 4.5  | 7.5  | 4.3  | 6.3  | 6.5  | 8.1  | 9.1  | 8.3  | 7.2  | 1.7  | 12.0 | 9.5  | 16.5 | 9.0  | 6.3  | 14.0 | 9.8  | 9.3  | 19.9 | 9.8  | 7.2  | 8.5  | 12.3 | 12.5 |
| upper limit                | 15.7 | 26.8 | 22.8 | 46.0 | 28.0 | 37.3 | 24.7 | 19.0 | 23.4 | 18.2 | 19.8 | 21.1 | 23.8 | 27.5 | 24.4 | 23.9 | 14.8 | 28.3 | 26.6 | 36.8 | 27.2 | 20.2 | 32.4 | 25.9 | 27.4 | 40.3 | 26.5 | 22.4 | 25.8 | 30.0 | 30.2 |
| Dietary risks              |      |      |      |      |      |      |      |      |      |      |      |      |      |      |      |      |      |      |      |      |      |      |      |      |      |      |      |      |      |      |      |
| value                      | 57.9 | 64.1 | 52.8 | 52.6 | 65.3 | 67.8 | 58.8 | 59.5 | 55.2 | 54.3 | 58.9 | 59.1 | 61.6 | 50.4 | 56.1 | 48.1 | 62.2 | 48.4 | 45.5 | 52.5 | 55.3 | 61.6 | 55.5 | 52.1 | 57.3 | 58.4 | 54.9 | 48.5 | 53.3 | 56.2 | 51.1 |
| lower limit                | 48.4 | 54.9 | 43.0 | 42.0 | 56.5 | 58.5 | 49.0 | 49.2 | 45.4 | 44.0 | 48.8 | 50.3 | 51.6 | 39.5 | 45.6 | 37.2 | 52.0 | 36.8 | 35.4 | 41.7 | 45.2 | 51.8 | 44.8 | 41.5 | 47.0 | 48.4 | 44.9 | 38.9 | 42.5 | 45.7 | 40.6 |
| upper limit                | 66.2 | 71.3 | 60.6 | 60.3 | 71.7 | 74.1 | 66.8 | 68.1 | 63.1 | 63.4 | 67.9 | 67.2 | 70.4 | 60.6 | 65.6 | 58.4 | 70.7 | 60.2 | 55.9 | 62.8 | 64.2 | 69.6 | 64.9 | 62.0 | 66.3 | 67.4 | 63.7 | 57.7 | 62.8 | 65.6 | 61.5 |
| Diet low in fruits         |      |      |      |      |      |      |      |      |      |      |      |      |      |      |      |      |      |      |      |      |      |      |      |      |      |      |      |      |      |      |      |
| value                      | 5.6  | 7.0  | 5.7  | 3.4  | 7.7  | 8.2  | 6.8  | 7.9  | 7.5  | 2.5  | 7.6  | 8.8  | 7.8  | 6.4  | 8.2  | 0.2  | 9.0  | 5.0  | 1.6  | 7.5  | 9.0  | 8.6  | 9.0  | 4.3  | 7.2  | 7.3  | 7.0  | 8.2  | 7.5  | 9.2  | 5.0  |
| lower limit                | 1.8  | 2.7  | 1.8  | 1.0  | 3.1  | 3.2  | 2.6  | 3.1  | 3.0  | 0.6  | 2.9  | 4.0  | 3.1  | 2.4  | 3.5  | 0.2  | 3.8  | 1.6  | 0.4  | 3.1  | 4.0  | 3.8  | 4.1  | 1.4  | 2.7  | 2.9  | 2.8  | 3.5  | 3.0  | 4.1  | 1.6  |
| upper limit                | 8.4  | 10.3 | 8.7  | 5.8  | 11.2 | 12.0 | 10.1 | 11.4 | 10.8 | 4.5  | 11.0 | 12.6 | 11.3 | 9.5  | 11.7 | 0.3  | 12.8 | 7.7  | 2.9  | 10.8 | 12.9 | 12.3 | 12.8 | 6.8  | 10.5 | 10.7 | 10.1 | 11.7 | 10.8 | 13.1 | 7.7  |
| Diet low in vegetables     |      |      |      |      |      |      |      |      |      |      |      |      |      |      |      |      |      |      |      |      |      |      |      |      |      |      |      |      |      |      |      |
| value                      | 4.5  | 1.2  | 11.1 | 5.1  | 9.7  | 12.2 | 7.4  | 12.4 | 11.7 | 10.7 | 11.3 | 10.1 | 11.7 | 10.3 | 10.6 | 9.4  | 12.1 | 9.0  | 10.2 | 7.3  | 10.4 | 11.1 | 10.0 | 8.9  | 11.5 | 10.6 | 9.5  | 6.7  | 9.1  | 10.9 | 9.6  |
| lower limit                | 1.5  | 0.3  | 7.3  | 2.0  | 5.8  | 7.9  | 3.9  | 8.3  | 7.7  | 6.7  | 7.2  | 6.4  | 7.6  | 6.5  | 6.8  | 5.7  | 8.1  | 5.4  | 6.5  | 3.6  | 6.6  | 7.3  | 6.3  | 5.3  | 7.5  | 6.8  | 5.8  | 3.3  | 5.4  | 6.9  | 5.8  |
| upper limit                | 7.0  | 2.3  | 15.0 | 8.0  | 13.4 | 16.5 | 10.8 | 16.7 | 15.7 | 14.5 | 15.2 | 13.8 | 15.8 | 14.0 | 14.3 | 12.8 | 16.4 | 12.4 | 13.9 | 10.6 | 14.2 | 15.1 | 13.7 | 12.4 | 15.6 | 14.3 | 12.8 | 9.9  | 12.7 | 14.8 | 13.2 |
| Diet low in whole grains   |      |      |      |      |      |      |      |      |      |      |      |      |      |      |      |      |      |      |      |      |      |      |      |      |      |      |      |      |      |      |      |
| value                      | 15.8 | 25.6 | 19.4 | 24.4 | 26.5 | 27.7 | 14.8 | 19.7 | 17.0 | 21.2 | 18.3 | 19.7 | 15.1 | 12.9 | 18.5 | 18.8 | 21.1 | 12.7 | 15.5 | 15.8 | 18.4 | 25.3 | 16.1 | 15.2 | 15.4 | 17.4 | 16.5 | 18.0 | 15.9 | 17.3 | 16.2 |
| lower limit                | 5.9  | 10.9 | 6.8  | 10.2 | 11.5 | 11.8 | 5.7  | 7.0  | 6.3  | 7.1  | 6.7  | 6.7  | 6.0  | 5.2  | 6.5  | 6.5  | 7.2  | 5.1  | 5.8  | 5.9  | 6.5  | 10.9 | 5.9  | 5.8  | 6.0  | 6.3  | 6.0  | 6.4  | 6.0  | 6.4  | 6.1  |
| upper limit                | 21.3 | 31.1 | 25.1 | 29.7 | 32.3 | 33.9 | 20.0 | 25.9 | 22.6 | 27.1 | 24.2 | 25.4 | 20.8 | 18.2 | 24.4 | 24.3 | 27.1 | 17.7 | 20.9 | 21.2 | 24.0 | 30.9 | 21.4 | 20.5 | 21.1 | 23.0 | 22.0 | 23.7 | 21.3 | 23.0 | 21.9 |
| Diet low in nuts and seeds |      |      |      |      |      |      |      |      |      |      |      |      |      |      |      |      |      |      |      |      |      |      |      |      |      |      |      |      |      |      |      |
| value                      | 12.7 | 12.6 | 2.4  | 0.8  | 12.5 | 10.0 | 11.4 | 0.4  | 1.0  | 11.7 | 6.4  | 11.0 | 10.6 | 0.9  | 2.9  | 5.6  | 1.4  | 0.2  | 0.5  | 0.9  | 0.8  | 2.8  | 0.3  | 0.5  | 0.4  | 4.9  | 2.9  | 0.2  | 0.3  | 0.4  | 1.5  |
| lower limit                | 8.8  | 7.5  | 0.5  | 0.2  | 7.7  | 4.3  | 5.9  | 0.2  | 0.2  | 8.2  | 2.1  | 5.7  | 4.5  | 0.2  | 0.9  | 1.9  | 0.3  | 0.2  | 0.2  | 0.3  | 0.2  | 0.9  | 0.2  | 0.2  | 0.2  | 1.5  | 0.7  | 0.2  | 0.2  | 0.2  | 0.4  |
| upper limit                | 16.7 | 16.5 | 4.9  | 2.1  | 16.6 | 14.3 | 15.3 | 1.1  | 2.6  | 16.0 | 10.2 | 14.9 | 14.9 | 2.5  | 5.2  | 8.9  | 3.4  | 0.4  | 1.2  | 2.0  | 2.1  | 5.1  | 0.8  | 1.4  | 1.2  | 8.0  | 5.3  | 0.4  | 0.7  | 1.3  | 3.4  |
| Diet high in red meat      |      |      |      |      |      |      |      |      |      |      |      |      |      |      |      |      |      |      |      |      |      |      |      |      |      |      |      |      |      |      |      |
| value                      | 2.6  | 3.1  | 2.6  | 3.4  | 2.7  | 4.2  | 3.3  | 5.8  | 1.2  | 1.0  | 2.8  | 2.4  | 3.4  | 2.0  | 1.9  | 2.0  | 4.4  | 2.4  | 2.9  | 1.9  | 3.6  | 3.6  | 1.8  | 2.3  | 3.8  | 1.8  | 4.3  | 4.3  | 1.5  | 1.9  | 3.1  |



|  |                                  |      |      |      |      |      |      |      |      |      |      |      |      |      |      |      |      |      |      |      |      |      |      |      |      |      |      |      |      |      |      |      |
|--|----------------------------------|------|------|------|------|------|------|------|------|------|------|------|------|------|------|------|------|------|------|------|------|------|------|------|------|------|------|------|------|------|------|------|
|  | lower limit                      | 1.0  | 0.8  | 1.4  | 0.8  | 0.8  | 0.8  | 0.8  | 0.8  | 0.9  | 0.8  | 0.8  | 0.8  | 0.8  | 0.8  | 0.8  | 0.8  | 0.8  | 0.8  | 0.8  | 0.8  | 0.8  | 0.8  | 0.8  | 0.8  | 0.8  | 0.8  | 0.8  | 0.8  | 0.8  | 0.0  |      |
|  | upper limit                      | 8.8  | 9.4  | 9.8  | 10.0 | 10.7 | 11.3 | 13.3 | 8.5  | 8.2  | 8.2  | 8.3  | 7.9  | 8.4  | 8.0  | 8.0  | 7.8  | 8.3  | 7.8  | 7.8  | 8.0  | 7.9  | 7.9  | 7.9  | 7.8  | 8.3  | 8.1  | 7.8  | 7.9  | 8.0  | 8.2  | 0.0  |
|  | Diet high in sodium              |      |      |      |      |      |      |      |      |      |      |      |      |      |      |      |      |      |      |      |      |      |      |      |      |      |      |      |      |      |      |      |
|  | value                            | 15.2 | 6.7  | 4.1  | 2.2  | 2.2  | 2.1  | 6.1  | 4.1  | 2.5  | 8.0  | 7.7  | 8.2  | 7.8  | 8.3  | 8.3  | 8.6  | 7.9  | 12.7 | 8.1  | 6.1  | 5.1  | 5.2  | 5.3  | 5.2  | 5.3  | 5.3  | 5.0  | 5.2  | 5.4  | 5.3  | 0.0  |
|  | lower limit                      | 4.4  | 0.5  | 0.2  | 0.3  | 0.3  | 0.2  | 0.3  | 0.2  | 0.2  | 0.3  | 0.3  | 0.4  | 0.3  | 0.3  | 0.3  | 0.3  | 0.3  | 0.6  | 0.3  | 0.2  | 0.2  | 0.2  | 0.2  | 0.2  | 0.2  | 0.2  | 0.2  | 0.2  | 0.2  | 0.2  | 0.0  |
|  | upper limit                      | 28.2 | 17.9 | 13.9 | 8.4  | 8.3  | 8.0  | 17.0 | 16.7 | 11.2 | 23.8 | 22.7 | 23.1 | 23.4 | 23.4 | 23.9 | 24.1 | 23.2 | 30.9 | 22.8 | 20.7 | 18.8 | 19.1 | 19.6 | 18.8 | 19.1 | 19.4 | 18.7 | 18.9 | 19.3 | 19.1 | 0.0  |
|  | Low physical activity            |      |      |      |      |      |      |      |      |      |      |      |      |      |      |      |      |      |      |      |      |      |      |      |      |      |      |      |      |      |      |      |
|  | value                            | 2.8  | 2.2  | 5.0  | 8.9  | 7.1  | 6.8  | 3.1  | 3.1  | 3.7  | 1.1  | 1.1  | 1.2  | 1.1  | 1.3  | 1.1  | 1.2  | 1.0  | 1.2  | 1.2  | 3.2  | 1.7  | 2.2  | 2.9  | 2.4  | 2.6  | 3.5  | 2.3  | 2.8  | 2.9  | 2.8  | 0.0  |
|  | lower limit                      | 0.8  | 0.7  | 1.4  | 3.5  | 2.5  | 2.3  | 0.9  | 0.8  | 1.0  | 0.3  | 0.3  | 0.3  | 0.3  | 0.4  | 0.3  | 0.4  | 0.3  | 0.4  | 0.3  | 0.8  | 0.5  | 0.6  | 0.8  | 0.6  | 0.7  | 1.0  | 0.6  | 0.7  | 0.8  | 0.7  | 0.0  |
|  | upper limit                      | 6.9  | 5.5  | 12.0 | 17.0 | 14.8 | 14.9 | 7.3  | 7.8  | 9.0  | 3.9  | 3.9  | 3.9  | 3.8  | 4.2  | 4.0  | 3.9  | 3.7  | 4.0  | 4.0  | 7.9  | 4.7  | 6.0  | 7.4  | 6.2  | 7.0  | 8.6  | 6.2  | 7.2  | 7.4  | 7.4  | 0.0  |
|  | Environmental/occupational risks |      |      |      |      |      |      |      |      |      |      |      |      |      |      |      |      |      |      |      |      |      |      |      |      |      |      |      |      |      |      |      |
|  | value                            | 41.5 | 39.5 | 42.6 | 33.9 | 43.5 | 51.2 | 46.4 | 46.3 | 42.7 | 46.6 | 42.9 | 43.4 | 44.1 | 43.6 | 44.4 | 43.4 | 52.4 | 40.9 | 41.6 | 42.1 | 46.9 | 48.5 | 41.7 | 42.9 | 44.7 | 41.8 | 48.5 | 52.1 | 41.7 | 41.1 | 43.5 |
|  | lower limit                      | 37.2 | 31.5 | 39.2 | 29.5 | 37.6 | 47.2 | 42.9 | 41.6 | 39.0 | 41.9 | 37.3 | 38.9 | 40.8 | 39.9 | 40.3 | 39.7 | 44.3 | 37.4 | 37.9 | 37.0 | 39.1 | 42.0 | 35.9 | 38.7 | 39.0 | 38.1 | 40.1 | 44.3 | 37.8 | 37.0 | 38.4 |
|  | upper limit                      | 45.4 | 46.7 | 46.2 | 38.2 | 48.5 | 55.5 | 50.1 | 52.1 | 46.6 | 52.5 | 47.3 | 48.2 | 47.7 | 47.4 | 49.4 | 47.2 | 65.7 | 44.3 | 45.3 | 46.5 | 54.0 | 56.0 | 46.2 | 48.2 | 49.7 | 45.9 | 56.1 | 62.1 | 46.7 | 44.8 | 47.8 |
|  | Behavioral risks                 |      |      |      |      |      |      |      |      |      |      |      |      |      |      |      |      |      |      |      |      |      |      |      |      |      |      |      |      |      |      |      |
|  | value                            | 71.1 | 72.5 | 60.6 | 70.1 | 78.8 | 76.1 | 70.7 | 65.2 | 60.0 | 60.4 | 64.0 | 60.8 | 66.4 | 58.6 | 62.1 | 59.2 | 68.4 | 60.3 | 52.6 | 59.1 | 59.8 | 67.1 | 63.6 | 61.3 | 62.5 | 64.2 | 60.8 | 54.1 | 62.5 | 64.9 | 58.5 |
|  | lower limit                      | 65.0 | 65.6 | 52.6 | 63.4 | 73.3 | 69.2 | 64.0 | 56.4 | 51.3 | 51.5 | 55.7 | 52.6 | 57.9 | 49.6 | 53.1 | 50.9 | 59.9 | 51.8 | 43.9 | 49.9 | 50.9 | 58.7 | 55.0 | 52.6 | 53.6 | 55.3 | 52.1 | 45.5 | 54.1 | 56.3 | 49.8 |
|  | upper limit                      | 76.5 | 77.9 | 67.2 | 75.0 | 82.6 | 80.9 | 76.3 | 72.4 | 67.2 | 68.1 | 71.9 | 68.5 | 73.9 | 67.0 | 70.0 | 67.3 | 75.5 | 68.9 | 61.8 | 67.5 | 67.5 | 73.5 | 70.8 | 68.9 | 70.4 | 71.6 | 68.3 | 61.8 | 70.0 | 72.2 | 67.1 |
|  | Suboptimal temperature           |      |      |      |      |      |      |      |      |      |      |      |      |      |      |      |      |      |      |      |      |      |      |      |      |      |      |      |      |      |      |      |
|  | value                            | 7.2  | 10.2 | 1.2  | 9.1  | 6.1  | 8.3  | 7.9  | 2.0  | 3.1  | 6.1  | 5.8  | 3.6  | 4.3  | 4.9  | 3.3  | 6.8  | 3.5  | 4.0  | 3.1  | 2.9  | 5.9  | 7.9  | 3.2  | 1.8  | 2.8  | 0.6  | 9.7  | 9.1  | 0.8  | 1.9  | 4.5  |
|  | lower limit                      | 2.9  | 3.3  | 0.0  | 6.7  | 0.9  | 5.7  | 5.0  | -0.2 | 1.5  | 2.7  | -2.6 | -0.3 | 2.6  | 2.7  | 1.7  | 3.9  | -3.6 | 2.0  | 1.4  | -5.3 | -7.1 | -1.9 | -6.8 | -0.4 | -8.1 | -0.6 | -3.2 | -1.4 | -0.1 | -3.2 | -4.4 |
|  | upper limit                      | 11.4 | 17.6 | 2.5  | 11.5 | 8.9  | 11.1 | 11.0 | 3.4  | 4.8  | 9.8  | 8.6  | 6.0  | 5.9  | 7.3  | 5.1  | 9.9  | 5.3  | 6.3  | 5.2  | 4.9  | 9.4  | 12.0 | 5.3  | 2.9  | 5.1  | 2.3  | 16.1 | 14.7 | 1.8  | 3.5  | 7.5  |
|  | Diet low in legumes              |      |      |      |      |      |      |      |      |      |      |      |      |      |      |      |      |      |      |      |      |      |      |      |      |      |      |      |      |      |      |      |
|  | value                            | 10.8 | 19.8 | 11.2 | 13.7 | 16.8 | 20.7 | 14.5 | 17.2 | 17.5 | 0.8  | 13.7 | 8.5  | 18.0 | 9.6  | 13.2 | 0.4  | 19.2 | 5.3  | 3.1  | 13.4 | 11.1 | 14.4 | 17.7 | 15.9 | 19.2 | 18.1 | 13.5 | 2.1  | 13.6 | 14.4 | 9.1  |
|  | lower limit                      | 1.1  | 7.0  | 1.0  | 2.1  | 4.0  | 6.5  | 2.5  | 4.2  | 4.8  | 0.2  | 1.8  | 0.9  | 4.8  | 0.9  | 1.8  | 0.2  | 5.6  | 0.5  | 0.3  | 2.0  | 1.2  | 2.5  | 5.2  | 4.1  | 5.6  | 5.2  | 2.1  | 0.3  | 2.1  | 2.2  | 0.8  |
|  | upper limit                      | 18.1 | 30.0 | 18.6 | 22.8 | 27.6 | 32.4 | 24.3 | 28.3 | 28.2 | 2.0  | 22.6 | 14.4 | 28.9 | 16.2 | 21.6 | 0.7  | 29.8 | 10.0 | 6.4  | 22.2 | 18.5 | 24.0 | 27.6 | 26.4 | 29.9 | 28.7 | 22.4 | 4.4  | 22.6 | 24.0 | 15.4 |

|                              |      |      |      |      |      |      |      |      |      |      |      |      |      |      |      |      |      |      |      |      |      |      |      |      |      |      |      |      |      |      |      |
|------------------------------|------|------|------|------|------|------|------|------|------|------|------|------|------|------|------|------|------|------|------|------|------|------|------|------|------|------|------|------|------|------|------|
| High temperature             |      |      |      |      |      |      |      |      |      |      |      |      |      |      |      |      |      |      |      |      |      |      |      |      |      |      |      |      |      |      |      |
| value                        | 0.1  | 0.1  | 0.0  | 0.7  | 2.2  | 0.4  | 0.0  | 0.9  | 0.0  | 0.0  | 3.3  | -0.7 | 0.0  | 0.0  | 0.0  | 0.0  | 1.9  | 0.0  | 0.0  | 2.1  | 4.1  | 3.7  | 2.1  | 0.7  | 1.9  | -0.1 | 5.0  | 4.5  | 0.1  | 1.4  | 3.7  |
| lower limit                  | 0.0  | 0.1  | -0.7 | -0.2 | -1.4 | -0.2 | -0.3 | -1.1 | -0.7 | -0.2 | -3.9 | -4.6 | -0.7 | -0.6 | -0.7 | 0.0  | -5.0 | -0.8 | -0.9 | -5.3 | -7.1 | -3.4 | -7.3 | -1.2 | -8.2 | -1.0 | -3.5 | -3.1 | -0.7 | -3.5 | -4.5 |
| upper limit                  | 0.3  | 0.2  | 0.6  | 1.6  | 4.1  | 1.1  | 0.3  | 2.1  | 0.6  | 0.0  | 5.9  | 0.9  | 0.5  | 0.4  | 0.7  | 0.0  | 3.6  | 0.5  | 0.6  | 4.1  | 7.4  | 6.6  | 4.0  | 1.8  | 3.9  | 0.5  | 9.0  | 8.1  | 1.1  | 3.2  | 6.6  |
| Low temperature              |      |      |      |      |      |      |      |      |      |      |      |      |      |      |      |      |      |      |      |      |      |      |      |      |      |      |      |      |      |      |      |
| value                        | 7.0  | 10.1 | 1.2  | 8.5  | 4.1  | 7.9  | 7.9  | 1.1  | 3.1  | 6.1  | 2.6  | 4.3  | 4.2  | 4.9  | 3.3  | 6.8  | 1.6  | 4.1  | 3.2  | 0.8  | 1.8  | 4.3  | 1.1  | 1.1  | 0.9  | 0.8  | 5.0  | 4.8  | 0.6  | 0.5  | 0.8  |
| lower limit                  | 2.7  | 3.1  | 0.3  | 5.8  | 1.8  | 5.2  | 4.9  | 0.4  | 1.8  | 2.9  | 1.2  | 3.0  | 2.8  | 2.8  | 1.6  | 4.1  | 0.9  | 2.2  | 1.5  | 0.0  | 0.0  | 1.1  | 0.2  | 0.5  | 0.0  | 0.1  | -0.5 | 0.2  | 0.1  | 0.1  | 0.3  |
| upper limit                  | 11.3 | 17.5 | 2.4  | 11.3 | 6.1  | 10.8 | 11.1 | 2.0  | 4.8  | 9.8  | 3.8  | 5.7  | 5.9  | 7.3  | 5.3  | 9.9  | 2.3  | 6.3  | 5.2  | 1.4  | 3.2  | 7.2  | 1.8  | 1.9  | 1.6  | 2.5  | 10.4 | 9.2  | 1.6  | 0.9  | 1.3  |
| Impaired kidney function     |      |      |      |      |      |      |      |      |      |      |      |      |      |      |      |      |      |      |      |      |      |      |      |      |      |      |      |      |      |      |      |
| value                        | 11.3 | 10.3 | 12.0 | 16.0 | 12.8 | 12.9 | 11.3 | 7.0  | 7.4  | 7.2  | 7.5  | 7.6  | 7.1  | 7.8  | 7.7  | 7.9  | 7.2  | 8.2  | 7.3  | 9.2  | 8.5  | 8.3  | 9.2  | 8.8  | 8.9  | 9.1  | 8.9  | 8.4  | 8.9  | 9.0  | 7.4  |
| lower limit                  | 8.0  | 6.8  | 8.9  | 12.6 | 9.8  | 10.0 | 8.3  | 4.5  | 4.8  | 4.7  | 5.0  | 5.0  | 4.7  | 5.2  | 5.2  | 5.3  | 4.8  | 5.5  | 4.8  | 6.5  | 5.9  | 5.7  | 6.4  | 6.1  | 6.3  | 6.3  | 6.1  | 5.8  | 6.2  | 6.3  | 4.8  |
| upper limit                  | 14.9 | 14.0 | 15.3 | 19.5 | 15.9 | 16.0 | 14.3 | 9.7  | 10.1 | 9.8  | 10.1 | 10.4 | 9.7  | 10.5 | 10.5 | 10.7 | 9.9  | 11.1 | 10.1 | 12.2 | 11.3 | 11.1 | 12.2 | 11.7 | 11.6 | 11.9 | 11.8 | 11.2 | 11.7 | 11.7 | 10.2 |
| High LDL cholesterol         |      |      |      |      |      |      |      |      |      |      |      |      |      |      |      |      |      |      |      |      |      |      |      |      |      |      |      |      |      |      |      |
| value                        | 51.0 | 46.2 | 47.9 | 52.0 | 53.0 | 57.7 | 41.7 | 43.9 | 42.0 | 38.5 | 42.1 | 30.4 | 42.0 | 43.7 | 44.7 | 25.2 | 38.1 | 43.7 | 31.9 | 40.2 | 23.9 | 39.4 | 42.4 | 41.1 | 44.2 | 43.5 | 37.9 | 37.9 | 40.5 | 45.8 | 37.6 |
| lower limit                  | 42.7 | 38.2 | 39.8 | 44.3 | 45.5 | 50.7 | 34.1 | 36.1 | 34.0 | 30.8 | 34.2 | 23.0 | 34.4 | 36.0 | 36.7 | 18.0 | 30.3 | 35.7 | 24.4 | 32.3 | 16.8 | 31.5 | 34.4 | 33.4 | 36.1 | 35.9 | 29.9 | 29.8 | 32.6 | 37.6 | 29.8 |
| upper limit                  | 59.8 | 54.4 | 56.3 | 59.9 | 60.7 | 65.7 | 50.0 | 52.2 | 50.3 | 46.9 | 50.5 | 38.6 | 50.4 | 51.3 | 52.9 | 33.3 | 47.0 | 51.9 | 40.4 | 48.2 | 32.3 | 47.7 | 51.1 | 49.6 | 52.4 | 51.6 | 46.6 | 46.2 | 49.1 | 53.9 | 45.8 |
| Particulate matter pollution |      |      |      |      |      |      |      |      |      |      |      |      |      |      |      |      |      |      |      |      |      |      |      |      |      |      |      |      |      |      |      |
| value                        | 34.9 | 28.9 | 36.8 | 23.2 | 32.2 | 39.5 | 37.1 | 42.6 | 38.5 | 40.8 | 37.4 | 37.8 | 39.6 | 38.1 | 39.0 | 37.1 | 47.5 | 36.1 | 37.2 | 37.5 | 40.1 | 40.6 | 37.2 | 38.8 | 40.5 | 38.6 | 39.5 | 43.5 | 38.8 | 38.1 | 38.1 |
| lower limit                  | 31.8 | 21.9 | 33.6 | 19.3 | 26.5 | 35.5 | 34.2 | 38.2 | 35.1 | 36.7 | 33.6 | 34.0 | 36.3 | 34.8 | 35.2 | 34.0 | 39.4 | 33.1 | 34.0 | 34.1 | 35.6 | 35.7 | 34.0 | 34.8 | 36.8 | 35.1 | 34.5 | 36.6 | 35.1 | 34.9 | 34.8 |
| upper limit                  | 38.1 | 35.2 | 40.2 | 27.2 | 37.8 | 44.1 | 40.4 | 48.8 | 42.5 | 47.0 | 41.4 | 42.8 | 42.9 | 41.9 | 44.3 | 40.5 | 61.5 | 39.4 | 40.6 | 41.6 | 47.3 | 48.1 | 41.1 | 44.2 | 45.3 | 42.8 | 46.9 | 54.6 | 43.9 | 41.6 | 41.9 |

\* PAF: population attributable fraction

§ DALY: disability adjusted life years

a: Democratic People's Republic of Korea; b: Tajikistan; c: Haiti; d: Syrian Arab Republic; e: Yemen; f: Afghanistan; g: Nepal; h: Central African Republic; I: Democratic Republic of the Congo; J: Burundi; k: Eritrea; l: Ethiopia; m: Madagascar; n: Malawi; o: Mozambique; p: Rwanda; q: Somalia; r: United Republic of Tanzania; s: Uganda; t: Benin; u: Burkina Faso; v: Chad; w: Gambia; x: Guinea; y: Guinea-Bissau; z: Liberia; ab: Mali; ac: Niger; ad: Sierra Leone; ae: Togo; af: South Sudan



|                  |             |      |      |      |      |      |      |      |      |      |      |      |      |      |      |      |      |      |      |      |      |      |      |      |      |      |      |      |      |      |      |      |      |      |      |      |      |      |      |      |      |      |      |      |      |      |      |     |
|------------------|-------------|------|------|------|------|------|------|------|------|------|------|------|------|------|------|------|------|------|------|------|------|------|------|------|------|------|------|------|------|------|------|------|------|------|------|------|------|------|------|------|------|------|------|------|------|------|------|-----|
| Lead exposure    | lower limit | 2.3  | 1.5  | 1.4  | 1.5  | 0.8  | 1.8  | 0.9  | 0.2  | 0.2  | 0.0  | 0.4  | 0.1  | 0.9  | 0.9  | 0.6  | 0.2  | 0.0  | 2.5  | 5.2  | 6.5  | 3.6  | 4.0  | 2.0  | 1.8  | 2.5  | 6.0  | 1.8  | 5.5  | 3.0  | 2.0  | 0.6  | 1.2  | 1.0  | 1.1  | 0.9  | 2.9  | 1.1  | 2.7  | 2.6  | 0.6  | 1.3  | 0.4  | 0.8  | 1.3  | 1.1  | 1.3  | 0.0 |
|                  | upper limit | 6.7  | 5.5  | 5.5  | 5.5  | 3.9  | 6.0  | 4.8  | 3.6  | 3.4  | 2.5  | 3.9  | 3.0  | 4.7  | 4.8  | 4.3  | 3.5  | 2.2  | 6.7  | 10.2 | 11.8 | 8.2  | 8.8  | 6.1  | 5.9  | 6.7  | 11.1 | 5.9  | 10.3 | 7.7  | 6.3  | 4.4  | 4.9  | 4.8  | 4.6  | 4.5  | 7.5  | 5.3  | 7.2  | 7.0  | 4.1  | 5.3  | 3.9  | 4.6  | 5.0  | 5.0  | 5.2  | 0.0 |
|                  | value       | 4.4  | 3.4  | 3.4  | 3.4  | 2.1  | 3.8  | 2.8  | 1.6  | 1.5  | 0.8  | 1.9  | 1.2  | 2.7  | 2.7  | 2.3  | 1.7  | 0.7  | 4.5  | 7.6  | 9.1  | 5.7  | 6.4  | 4.0  | 3.7  | 4.5  | 8.7  | 3.7  | 7.9  | 5.3  | 4.1  | 2.4  | 2.9  | 2.8  | 2.7  | 2.5  | 5.2  | 3.1  | 4.9  | 4.7  | 2.1  | 3.2  | 1.9  | 2.6  | 3.0  | 3.0  | 3.2  | 0.0 |
|                  | lower limit | 2.3  | 1.5  | 1.4  | 1.5  | 0.8  | 1.8  | 0.9  | 0.2  | 0.2  | 0.0  | 0.4  | 0.1  | 0.9  | 0.9  | 0.6  | 0.2  | 0.0  | 2.5  | 5.2  | 6.5  | 3.6  | 4.0  | 2.0  | 1.8  | 2.5  | 6.0  | 1.8  | 5.5  | 3.0  | 2.0  | 0.6  | 1.2  | 1.0  | 1.1  | 0.9  | 2.9  | 1.1  | 2.7  | 2.6  | 0.6  | 1.3  | 0.4  | 0.8  | 1.3  | 1.1  | 1.3  | 0.0 |
|                  | upper limit | 6.7  | 5.5  | 5.5  | 5.5  | 3.9  | 6.0  | 4.8  | 3.6  | 3.4  | 2.5  | 3.9  | 3.0  | 4.7  | 4.8  | 4.3  | 3.5  | 2.2  | 6.7  | 10.2 | 11.8 | 8.2  | 8.8  | 6.1  | 5.9  | 6.7  | 11.1 | 5.9  | 10.3 | 7.7  | 6.3  | 4.4  | 4.9  | 4.8  | 4.6  | 4.5  | 7.5  | 5.3  | 7.2  | 7.0  | 4.1  | 5.3  | 3.9  | 4.6  | 5.0  | 5.0  | 5.2  | 0.0 |
| Tobacco          | value       | 35.4 | 33.7 | 32.2 | 27.2 | 36.1 | 28.2 | 32.8 | 53.5 | 43.7 | 36.6 | 41.3 | 28.2 | 32.2 | 36.1 | 25.0 | 26.6 | 29.0 | 13.0 | 13.9 | 20.5 | 16.3 | 31.2 | 22.2 | 34.9 | 31.5 | 27.6 | 16.3 | 22.7 | 28.1 | 20.5 | 15.2 | 16.4 | 26.9 | 15.7 | 17.9 | 28.8 | 13.6 | 24.5 | 15.4 | 12.2 | 22.3 | 9.8  | 15.0 | 10.2 | 10.2 | 17.2 | 0.0 |
|                  | lower limit | 32.5 | 30.9 | 29.2 | 24.6 | 33.4 | 24.5 | 30.5 | 51.2 | 40.0 | 32.8 | 38.9 | 25.8 | 30.5 | 34.0 | 23.5 | 24.7 | 26.6 | 11.4 | 12.4 | 18.5 | 14.7 | 29.1 | 20.4 | 32.5 | 29.5 | 25.9 | 13.8 | 20.9 | 25.7 | 18.6 | 13.4 | 14.2 | 23.4 | 14.0 | 15.9 | 25.9 | 11.9 | 21.6 | 13.7 | 11.0 | 20.1 | 8.7  | 12.9 | 9.1  | 8.9  | 15.3 | 0.0 |
|                  | upper limit | 38.3 | 36.5 | 35.1 | 29.7 | 38.7 | 31.9 | 35.2 | 55.7 | 47.4 | 40.7 | 43.7 | 30.6 | 34.1 | 38.1 | 26.4 | 28.5 | 31.5 | 14.5 | 15.4 | 22.6 | 18.1 | 33.4 | 23.9 | 37.5 | 33.5 | 29.5 | 18.8 | 24.5 | 30.4 | 22.3 | 17.0 | 19.0 | 30.4 | 17.4 | 20.2 | 31.6 | 15.7 | 27.6 | 17.0 | 13.4 | 24.5 | 11.0 | 17.2 | 11.6 | 11.6 | 19.3 | 0.0 |
|                  | value       | 30.7 | 28.5 | 27.0 | 23.1 | 31.3 | 23.8 | 28.2 | 48.5 | 39.4 | 31.1 | 35.8 | 23.7 | 27.5 | 32.1 | 21.0 | 24.0 | 26.1 | 11.1 | 11.8 | 16.9 | 13.0 | 25.6 | 17.3 | 29.2 | 26.4 | 22.8 | 13.0 | 18.1 | 23.1 | 17.3 | 12.2 | 12.3 | 22.4 | 13.3 | 14.6 | 24.2 | 11.0 | 20.8 | 12.9 | 9.5  | 17.9 | 7.7  | 12.1 | 7.5  | 8.6  | 12.3 | 0.0 |
|                  | lower limit | 27.8 | 25.4 | 24.0 | 20.6 | 28.5 | 19.9 | 26.0 | 46.3 | 35.5 | 27.1 | 33.6 | 21.3 | 26.0 | 30.1 | 19.8 | 22.2 | 23.5 | 9.6  | 10.4 | 15.1 | 11.4 | 23.8 | 15.8 | 27.0 | 24.5 | 21.2 | 10.7 | 16.3 | 20.6 | 15.6 | 10.5 | 10.2 | 18.8 | 11.6 | 12.7 | 21.1 | 9.3  | 17.7 | 11.3 | 8.5  | 15.9 | 6.6  | 10.1 | 6.5  | 7.3  | 10.5 | 0.0 |
| upper limit      | 33.8        | 31.7 | 29.9 | 25.7 | 34.0 | 27.7 | 30.7 | 50.6 | 43.3 | 35.1 | 38.0 | 25.9 | 29.3 | 34.1 | 22.3 | 26.0 | 28.8 | 12.5 | 13.3 | 18.9 | 14.6 | 27.7 | 19.0 | 31.8 | 28.4 | 24.6 | 15.5 | 19.9 | 25.5 | 19.0 | 14.0 | 14.6 | 26.2 | 15.1 | 16.7 | 27.3 | 13.1 | 23.8 | 14.6 | 10.6 | 20.1 | 8.8  | 14.1 | 8.8  | 10.0 | 14.2 | 0.0  |     |
| Secondhand smoke | value       | 6.1  | 6.5  | 6.7  | 5.2  | 7.0  | 5.6  | 6.0  | 9.9  | 7.2  | 8.3  | 8.6  | 5.9  | 6.4  | 5.6  | 5.0  | 3.4  | 4.2  | 2.2  | 2.5  | 4.4  | 3.9  | 7.1  | 5.9  | 7.9  | 6.9  | 5.8  | 3.8  | 5.5  | 6.4  | 3.9  | 3.4  | 4.7  | 5.5  | 2.7  | 3.8  | 5.8  | 2.8  | 4.5  | 2.8  | 3.0  | 5.4  | 2.4  | 3.5  | 3.0  | 1.8  | 5.6  | 0.0 |
|                  | lower limit | 5.0  | 5.2  | 5.4  | 4.1  | 5.6  | 4.3  | 4.9  | 7.9  | 5.5  | 6.4  | 6.7  | 4.6  | 5.3  | 4.6  | 4.0  | 2.8  | 3.4  | 1.6  | 2.0  | 3.4  | 3.1  | 5.8  | 4.8  | 6.5  | 5.6  | 4.6  | 3.1  | 4.4  | 5.0  | 3.1  | 2.6  | 3.7  | 4.2  | 2.1  | 2.8  | 4.7  | 2.2  | 3.6  | 2.2  | 2.4  | 4.3  | 1.8  | 2.7  | 2.4  | 1.4  | 4.5  | 0.0 |
|                  | upper limit | 7.3  | 8.0  | 8.1  | 6.4  | 8.4  | 6.9  | 7.2  | 12.1 | 9.0  | 10.2 | 10.6 | 7.5  | 7.6  | 6.8  | 6.1  | 4.1  | 5.0  | 2.8  | 3.1  | 5.4  | 4.8  | 8.5  | 7.1  | 9.4  | 8.2  | 7.1  | 4.7  | 6.8  | 7.8  | 4.8  | 4.3  | 5.8  | 6.8  | 3.4  | 4.9  | 7.0  | 3.6  | 5.5  | 3.5  | 3.7  | 6.6  | 3.0  | 4.4  | 3.7  | 2.3  | 6.8  | 0.0 |

---

Alcohol use

|             |      |      |      |      |      |      |      |      |      |      |      |      |      |      |      |      |      |      |      |      |      |      |      |      |      |      |      |      |      |      |      |      |      |      |      |      |      |      |      |      |      |      |     |      |      |      |     |
|-------------|------|------|------|------|------|------|------|------|------|------|------|------|------|------|------|------|------|------|------|------|------|------|------|------|------|------|------|------|------|------|------|------|------|------|------|------|------|------|------|------|------|------|-----|------|------|------|-----|
| value       | -1.9 | -1.3 | -3.5 | -1.4 | -2.0 | -1.7 | -2.0 | -2.1 | -1.4 | -3.7 | -3.4 | -1.2 | -1.0 | -2.0 | -2.1 | -3.2 | -2.7 | -4.0 | -1.7 | -0.6 | -0.6 | -0.5 | -0.5 | 0.1  | -0.6 | -0.1 | -1.3 | -0.4 | -0.4 | -2.1 | -4.3 | -0.7 | -2.0 | -2.3 | -2.0 | -2.3 | 0.1  | -2.2 | -0.6 | -0.7 | -2.9 | -2.5 | 0.0 | -0.8 | -0.8 | -0.4 | 0.0 |
| lower limit | -4.5 | -2.3 | -6.3 | -3.0 | -5.0 | -3.4 | -5.5 | -3.4 | -2.8 | -5.8 | -5.2 | -2.3 | -2.6 | -4.8 | -3.7 | -6.6 | -5.4 | -6.2 | -2.9 | -1.7 | -1.7 | -0.8 | -0.8 | -0.4 | -1.2 | -0.3 | -2.1 | -1.7 | -0.9 | -4.7 | -6.8 | -1.1 | -3.2 | -4.6 | -4.2 | -4.5 | -2.0 | -3.9 | -2.8 | -2.5 | -5.4 | -4.5 | 0.0 | -2.5 | -2.9 | -0.7 | 0.0 |
| upper limit | 0.9  | -0.5 | -0.5 | 0.2  | 0.9  | 0.0  | 1.8  | -0.6 | 0.0  | -1.7 | -1.6 | 0.0  | 0.8  | 1.1  | -0.4 | 0.2  | 0.4  | -1.8 | -0.4 | 0.5  | 0.6  | -0.2 | -0.2 | 0.7  | 0.0  | 0.1  | -0.4 | 0.9  | 0.0  | 0.7  | -1.2 | -0.3 | -0.9 | 0.0  | 0.4  | 0.3  | 2.4  | -0.4 | 1.9  | 1.4  | 0.0  | -0.1 | 0.0 | 1.1  | 1.4  | -0.2 | 0.0 |

Metabolic risks

|             |      |      |      |      |      |      |      |      |      |      |      |      |      |      |      |      |      |      |      |      |      |      |      |      |      |      |      |      |      |      |      |      |      |      |      |      |      |      |      |      |      |      |      |      |      |      |     |
|-------------|------|------|------|------|------|------|------|------|------|------|------|------|------|------|------|------|------|------|------|------|------|------|------|------|------|------|------|------|------|------|------|------|------|------|------|------|------|------|------|------|------|------|------|------|------|------|-----|
| value       | 78.6 | 86.6 | 83.6 | 83.9 | 83.1 | 82.8 | 84.9 | 87.5 | 88.4 | 83.7 | 84.5 | 90.8 | 77.3 | 87.7 | 87.8 | 85.9 | 84.7 | 79.6 | 87.3 | 86.8 | 87.0 | 88.7 | 90.3 | 88.1 | 87.6 | 78.2 | 84.4 | 82.8 | 85.4 | 83.3 | 86.2 | 81.0 | 80.6 | 79.1 | 75.6 | 79.6 | 86.1 | 85.7 | 79.8 | 85.7 | 85.5 | 86.9 | 82.4 | 84.8 | 86.3 | 84.5 | 0.0 |
| lower limit | 71.7 | 82.1 | 78.4 | 78.6 | 77.8 | 77.1 | 79.1 | 82.5 | 83.4 | 77.3 | 78.2 | 86.9 | 70.1 | 83.1 | 83.0 | 80.2 | 78.9 | 72.9 | 82.1 | 81.3 | 81.9 | 84.5 | 85.9 | 83.2 | 82.4 | 71.5 | 78.8 | 77.4 | 80.6 | 77.6 | 81.1 | 74.5 | 74.1 | 72.8 | 68.4 | 72.4 | 80.8 | 80.4 | 73.1 | 79.4 | 80.3 | 82.1 | 76.6 | 79.8 | 81.0 | 78.7 | 0.0 |
| upper limit | 85.5 | 90.6 | 88.8 | 89.0 | 88.0 | 88.3 | 90.0 | 91.9 | 92.5 | 89.8 | 89.7 | 94.1 | 84.3 | 91.7 | 92.3 | 91.1 | 90.2 | 86.0 | 92.3 | 91.9 | 92.1 | 92.4 | 94.0 | 92.5 | 92.5 | 84.4 | 89.3 | 87.8 | 89.7 | 88.3 | 90.8 | 86.7 | 86.4 | 84.8 | 82.5 | 86.2 | 90.9 | 90.7 | 86.0 | 91.2 | 90.4 | 91.3 | 87.9 | 89.4 | 91.1 | 89.7 | 0.0 |

High fasting plasma glucose

|             |      |      |      |      |      |      |      |      |      |      |      |      |      |      |      |      |      |      |      |      |      |      |      |      |      |      |      |      |      |      |      |      |      |      |      |      |      |      |      |      |      |      |      |      |      |      |     |
|-------------|------|------|------|------|------|------|------|------|------|------|------|------|------|------|------|------|------|------|------|------|------|------|------|------|------|------|------|------|------|------|------|------|------|------|------|------|------|------|------|------|------|------|------|------|------|------|-----|
| value       | 27.3 | 17.3 | 25.0 | 24.6 | 16.5 | 25.7 | 24.3 | 35.9 | 37.3 | 37.1 | 31.7 | 31.9 | 12.4 | 8.5  | 28.4 | 17.5 | 14.8 | 24.7 | 33.4 | 35.3 | 34.9 | 27.4 | 33.0 | 34.6 | 34.7 | 17.6 | 21.0 | 27.9 | 21.1 | 21.5 | 22.5 | 14.9 | 14.7 | 14.1 | 15.1 | 24.8 | 25.4 | 27.7 | 16.1 | 28.3 | 19.4 | 22.1 | 13.7 | 15.1 | 22.0 | 25.9 | 0.0 |
| lower limit | 15.9 | 11.2 | 15.4 | 15.2 | 10.7 | 14.7 | 14.4 | 22.6 | 23.4 | 22.7 | 19.5 | 20.9 | 7.5  | 5.6  | 16.5 | 10.6 | 9.6  | 14.7 | 20.1 | 21.4 | 21.3 | 15.6 | 20.1 | 22.1 | 21.6 | 11.4 | 12.9 | 17.5 | 13.9 | 12.9 | 13.8 | 7.9  | 8.7  | 8.7  | 9.3  | 13.9 | 16.6 | 16.6 | 10.5 | 16.5 | 11.7 | 13.1 | 8.1  | 8.8  | 13.0 | 15.5 | 0.0 |
| upper limit | 44.8 | 27.3 | 38.1 | 38.0 | 25.3 | 44.3 | 38.9 | 50.7 | 54.2 | 54.6 | 46.7 | 45.4 | 19.9 | 12.4 | 45.2 | 28.7 | 21.9 | 39.2 | 51.6 | 54.7 | 53.8 | 42.7 | 50.9 | 53.4 | 52.6 | 27.2 | 32.9 | 42.4 | 30.7 | 34.5 | 34.9 | 26.3 | 24.1 | 22.5 | 24.1 | 40.6 | 38.8 | 44.3 | 23.9 | 44.2 | 30.7 | 35.1 | 22.4 | 25.0 | 35.4 | 39.9 | 0.0 |

High systolic blood pressure

|             |      |      |      |      |      |      |      |      |      |      |      |      |      |      |      |      |      |      |      |      |      |      |      |      |      |      |      |      |      |      |      |      |      |      |      |      |      |      |      |      |      |      |      |      |      |      |     |
|-------------|------|------|------|------|------|------|------|------|------|------|------|------|------|------|------|------|------|------|------|------|------|------|------|------|------|------|------|------|------|------|------|------|------|------|------|------|------|------|------|------|------|------|------|------|------|------|-----|
| value       | 38.9 | 65.5 | 50.6 | 55.0 | 46.6 | 59.5 | 58.9 | 45.4 | 43.9 | 40.3 | 36.4 | 64.1 | 43.7 | 63.0 | 57.4 | 65.1 | 57.6 | 39.2 | 52.8 | 54.0 | 55.1 | 56.8 | 62.6 | 49.6 | 51.4 | 53.8 | 52.2 | 52.3 | 58.6 | 60.7 | 62.6 | 55.6 | 57.6 | 56.6 | 43.8 | 53.4 | 60.5 | 62.3 | 59.5 | 62.4 | 63.8 | 59.5 | 57.7 | 64.4 | 64.4 | 61.4 | 0.0 |
| lower limit | 31.0 | 58.3 | 42.8 | 47.1 | 38.2 | 51.5 | 50.3 | 36.4 | 35.5 | 30.9 | 27.4 | 55.9 | 35.0 | 55.3 | 49.0 | 56.1 | 47.8 | 30.8 | 43.9 | 44.7 | 46.1 | 48.8 | 54.7 | 41.5 | 42.9 | 46.2 | 44.1 | 45.0 | 50.4 | 52.7 | 53.8 | 47.2 | 49.0 | 49.0 | 34.8 | 45.3 | 52.7 | 54.4 | 51.0 | 53.2 | 55.5 | 52.0 | 48.8 | 56.9 | 56.3 | 53.4 | 0.0 |
| upper limit | 47.0 | 72.3 | 58.6 | 62.4 | 54.4 | 67.1 | 66.8 | 55.0 | 52.8 | 48.9 | 45.4 | 71.5 | 53.1 | 70.5 | 65.0 | 74.0 | 67.4 | 48.9 | 62.3 | 63.0 | 63.5 | 64.3 | 70.5 | 57.1 | 60.0 | 61.6 | 60.3 | 59.5 | 66.0 | 68.5 | 70.5 | 63.4 | 65.6 | 63.6 | 52.5 | 61.7 | 68.0 | 70.0 | 67.2 | 71.1 | 71.1 | 66.9 | 66.2 | 71.1 | 72.3 | 68.6 | 0.0 |

High body-mass

---



|                          |      |      |      |      |      |      |      |      |      |      |      |      |      |      |      |      |      |      |      |      |      |      |      |      |      |      |      |      |      |      |      |      |      |      |      |      |      |      |      |      |      |      |      |      |      |      |     |
|--------------------------|------|------|------|------|------|------|------|------|------|------|------|------|------|------|------|------|------|------|------|------|------|------|------|------|------|------|------|------|------|------|------|------|------|------|------|------|------|------|------|------|------|------|------|------|------|------|-----|
| index                    |      |      |      |      |      |      |      |      |      |      |      |      |      |      |      |      |      |      |      |      |      |      |      |      |      |      |      |      |      |      |      |      |      |      |      |      |      |      |      |      |      |      |      |      |      |      |     |
| value                    | 11.7 | 20.7 | 17.7 | 14.4 | 20.7 | 7.6  | 10.4 | 36.5 | 39.6 | 19.5 | 31.3 | 29.5 | 25.0 | 29.0 | 31.9 | 28.5 | 29.3 | 29.7 | 27.0 | 23.9 | 25.1 | 41.2 | 31.8 | 31.7 | 31.1 | 12.6 | 20.4 | 18.5 | 21.4 | 17.3 | 28.2 | 18.2 | 17.8 | 24.0 | 22.4 | 28.2 | 38.3 | 21.7 | 31.7 | 23.7 | 24.5 | 30.5 | 28.9 | 20.8 | 27.4 | 20.8 | 0.0 |
| lower limit              | 5.6  | 12.6 | 9.5  | 7.5  | 11.9 | 2.7  | 4.8  | 22.4 | 26.5 | 9.2  | 18.2 | 17.8 | 15.4 | 18.4 | 20.6 | 18.4 | 19.3 | 19.2 | 16.3 | 13.7 | 15.2 | 28.1 | 20.2 | 20.7 | 19.8 | 6.3  | 11.2 | 11.2 | 11.7 | 9.0  | 18.9 | 10.2 | 9.6  | 15.7 | 13.6 | 18.6 | 26.1 | 13.9 | 20.8 | 15.2 | 15.2 | 20.8 | 19.6 | 12.4 | 17.7 | 12.7 | 0.0 |
| upper limit              | 19.6 | 29.4 | 26.6 | 22.7 | 29.7 | 14.3 | 17.7 | 51.1 | 53.0 | 31.8 | 45.9 | 42.5 | 35.2 | 40.2 | 43.6 | 39.2 | 39.7 | 40.8 | 38.4 | 35.1 | 35.9 | 53.3 | 43.7 | 43.4 | 42.7 | 20.2 | 31.0 | 26.3 | 32.4 | 26.4 | 37.6 | 27.0 | 27.1 | 33.3 | 32.5 | 38.4 | 49.9 | 30.7 | 43.4 | 33.4 | 34.8 | 40.6 | 39.2 | 30.3 | 38.0 | 30.3 | 0.0 |
| Dietary risks            |      |      |      |      |      |      |      |      |      |      |      |      |      |      |      |      |      |      |      |      |      |      |      |      |      |      |      |      |      |      |      |      |      |      |      |      |      |      |      |      |      |      |      |      |      |      |     |
| value                    | 55.7 | 56.3 | 55.0 | 53.0 | 57.0 | 57.3 | 52.3 | 61.5 | 61.3 | 63.1 | 63.3 | 60.7 | 62.2 | 73.7 | 64.6 | 57.1 | 54.9 | 52.6 | 49.8 | 56.5 | 51.4 | 45.8 | 47.5 | 56.6 | 46.1 | 60.5 | 56.7 | 60.2 | 67.7 | 54.2 | 55.6 | 53.8 | 63.3 | 53.4 | 56.4 | 55.4 | 54.7 | 54.8 | 48.3 | 47.8 | 57.7 | 53.4 | 59.9 | 51.8 | 53.3 | 54.0 | 0.0 |
| lower limit              | 44.7 | 44.8 | 43.4 | 41.9 | 46.2 | 47.2 | 40.7 | 50.6 | 50.7 | 52.3 | 53.0 | 50.3 | 52.6 | 66.1 | 54.9 | 47.7 | 44.4 | 42.3 | 39.6 | 46.4 | 42.8 | 35.2 | 36.8 | 45.8 | 35.5 | 51.0 | 47.2 | 50.6 | 58.6 | 43.6 | 45.1 | 43.3 | 53.9 | 44.6 | 46.2 | 44.8 | 44.2 | 44.3 | 37.6 | 37.4 | 46.7 | 41.5 | 50.9 | 41.1 | 41.9 | 43.4 | 0.0 |
| upper limit              | 65.2 | 65.7 | 64.5 | 62.8 | 66.3 | 66.6 | 62.7 | 69.7 | 69.5 | 71.0 | 70.7 | 69.0 | 69.5 | 79.5 | 71.8 | 64.6 | 62.7 | 61.2 | 58.9 | 65.1 | 59.9 | 53.0 | 54.0 | 64.1 | 53.7 | 68.1 | 65.0 | 68.0 | 74.1 | 63.1 | 64.4 | 64.2 | 71.8 | 60.5 | 65.9 | 64.1 | 63.6 | 64.2 | 58.4 | 58.1 | 67.2 | 64.3 | 67.6 | 60.9 | 63.2 | 63.5 | 0.0 |
| Diet low in fruits       |      |      |      |      |      |      |      |      |      |      |      |      |      |      |      |      |      |      |      |      |      |      |      |      |      |      |      |      |      |      |      |      |      |      |      |      |      |      |      |      |      |      |      |      |      |      |     |
| value                    | 8.2  | 6.4  | 5.2  | 7.5  | 4.5  | 8.1  | 5.5  | 7.2  | 7.5  | 7.6  | 8.2  | 5.9  | 6.5  | 9.4  | 4.6  | 5.4  | 6.2  | 4.4  | 5.0  | 4.7  | 7.4  | 1.7  | 1.5  | 4.8  | 2.4  | 8.4  | 7.0  | 9.4  | 8.2  | 5.9  | 6.7  | 4.3  | 9.0  | 6.6  | 9.4  | 8.9  | 7.2  | 8.7  | 3.8  | 6.3  | 5.4  | 1.9  | 8.3  | 5.9  | 2.0  | 7.7  | 0.0 |
| lower limit              | 3.5  | 2.5  | 1.7  | 3.0  | 1.6  | 3.4  | 1.8  | 2.5  | 2.9  | 2.9  | 3.1  | 1.9  | 2.4  | 4.2  | 1.4  | 1.9  | 2.4  | 1.5  | 1.7  | 1.4  | 3.1  | 0.4  | 0.4  | 1.6  | 0.6  | 3.6  | 2.7  | 4.2  | 3.3  | 2.1  | 2.5  | 1.2  | 3.9  | 2.6  | 4.2  | 3.9  | 2.8  | 3.8  | 1.2  | 2.5  | 1.8  | 0.6  | 3.7  | 2.2  | 0.5  | 3.3  | 0.0 |
| upper limit              | 11.7 | 9.5  | 8.1  | 10.8 | 7.0  | 11.6 | 8.3  | 10.7 | 11.1 | 11.2 | 11.9 | 9.1  | 9.5  | 13.4 | 7.2  | 8.1  | 9.2  | 7.0  | 7.7  | 7.4  | 10.6 | 3.1  | 2.8  | 7.6  | 4.2  | 12.0 | 10.2 | 13.4 | 11.9 | 9.0  | 9.8  | 6.7  | 12.8 | 9.7  | 13.3 | 12.6 | 10.5 | 12.4 | 6.2  | 9.2  | 8.3  | 3.4  | 11.8 | 8.7  | 3.7  | 11.0 | 0.0 |
| Diet low in vegetables   |      |      |      |      |      |      |      |      |      |      |      |      |      |      |      |      |      |      |      |      |      |      |      |      |      |      |      |      |      |      |      |      |      |      |      |      |      |      |      |      |      |      |      |      |      |      |     |
| value                    | 10.3 | 8.3  | 7.3  | 6.6  | 7.6  | 9.9  | 4.0  | 10.9 | 11.3 | 9.8  | 13.4 | 10.7 | 1.2  | 8.5  | 0.2  | 4.4  | 1.4  | 8.6  | 6.9  | 7.5  | 9.9  | 0.2  | 2.2  | 3.6  | 1.1  | 10.1 | 7.9  | 7.3  | 10.3 | 8.2  | 11.2 | 10.9 | 8.5  | 7.8  | 10.8 | 10.7 | 10.9 | 11.2 | 5.6  | 4.2  | 9.1  | 8.2  | 9.7  | 6.4  | 9.5  | 7.7  | 0.0 |
| lower limit              | 6.5  | 4.7  | 3.6  | 3.1  | 4.0  | 6.1  | 1.4  | 6.5  | 7.1  | 5.8  | 9.0  | 6.4  | 0.3  | 4.6  | 0.2  | 1.7  | 0.3  | 5.2  | 3.6  | 4.1  | 6.4  | 0.2  | 0.4  | 1.1  | 0.3  | 6.3  | 4.3  | 3.8  | 6.2  | 4.4  | 7.3  | 7.2  | 4.8  | 4.3  | 6.8  | 6.7  | 6.9  | 7.4  | 2.3  | 1.6  | 5.4  | 4.6  | 6.0  | 3.1  | 5.8  | 4.3  | 0.0 |
| upper limit              | 14.0 | 11.7 | 10.6 | 9.7  | 11.0 | 13.4 | 6.3  | 15.0 | 15.4 | 13.7 | 18.0 | 14.6 | 2.3  | 12.2 | 0.2  | 7.0  | 2.6  | 11.8 | 10.1 | 10.5 | 13.4 | 0.2  | 3.8  | 5.8  | 2.1  | 13.8 | 11.3 | 10.5 | 14.1 | 11.7 | 15.2 | 14.9 | 12.2 | 11.1 | 14.6 | 14.5 | 14.8 | 15.1 | 8.6  | 6.5  | 12.7 | 11.5 | 13.2 | 9.5  | 12.9 | 10.9 | 0.0 |
| Diet low in whole grains |      |      |      |      |      |      |      |      |      |      |      |      |      |      |      |      |      |      |      |      |      |      |      |      |      |      |      |      |      |      |      |      |      |      |      |      |      |      |      |      |      |      |      |      |      |      |     |
| value                    | 9.3  | 12.7 | 10.6 | 13.8 | 14.2 | 13.3 | 11.3 | 23.7 | 22.4 | 23.6 | 22.0 | 21.8 | 24.6 | 27.0 | 25.7 | 16.4 | 19.7 | 16.8 | 15.3 | 14.9 | 14.0 | 18.2 | 25.0 | 24.6 | 22.7 | 10.7 | 15.1 | 16.4 | 27.0 | 18.3 | 17.3 | 17.5 | 21.7 | 16.5 | 13.9 | 11.6 | 13.5 | 14.2 | 15.7 | 14.2 | 19.3 | 18.3 | 20.3 | 17.7 | 20.2 | 16.8 | 0.0 |
| lower                    | 3.6  | 5.3  | 4.4  | 5.4  | 5.7  | 5.2  | 4.7  | 8.1  | 7.5  | 7.9  | 7.7  | 7.4  | 10.7 | 11.5 | 11.0 | 5.7  | 6.7  | 6.0  | 5.6  | 5.5  | 5.4  | 6.5  | 10.7 | 10.2 | 8.9  | 4.4  | 5.8  | 6.1  | 11.2 | 6.6  | 6.4  | 6.3  | 7.3  | 6.2  | 5.6  | 4.9  | 5.5  | 5.5  | 6.0  | 5.5  | 6.7  | 6.5  | 6.8  | 6.3  | 6.8  | 6.0  | 0.0 |







|                        |             |      |      |      |      |      |      |      |      |      |      |      |      |      |      |      |      |      |      |      |      |      |      |      |      |      |      |      |      |      |      |      |      |      |      |      |      |      |      |      |      |      |      |      |       |      |      |      |
|------------------------|-------------|------|------|------|------|------|------|------|------|------|------|------|------|------|------|------|------|------|------|------|------|------|------|------|------|------|------|------|------|------|------|------|------|------|------|------|------|------|------|------|------|------|------|------|-------|------|------|------|
| Suboptimal temperature | lower limit | 63.5 | 63.5 | 60.2 | 57.5 | 64.5 | 61.3 | 59.4 | 76.6 | 72.4 | 68.5 | 71.7 | 63.8 | 67.4 | 77.4 | 65.4 | 60.2 | 59.4 | 49.2 | 47.5 | 57.1 | 52.0 | 57.8 | 54.5 | 66.9 | 56.0 | 65.2 | 57.0 | 62.2 | 70.4 | 55.1 | 52.7 | 52.6 | 64.8 | 52.5 | 54.9 | 60.0 | 53.3 | 57.1 | 48.1 | 45.8 | 57.2 | 47.4 | 61.3 | 48.4  | 48.9 | 54.2 | 67.3 |
|                        | upper limit | 76.8 | 76.9 | 74.8 | 72.5 | 77.0 | 75.2 | 74.1 | 85.5 | 83.0 | 80.9 | 82.2 | 77.2 | 78.7 | 85.9 | 78.0 | 73.2 | 72.4 | 65.6 | 63.7 | 71.6 | 65.9 | 69.8 | 67.3 | 77.9 | 68.6 | 77.2 | 71.4 | 75.0 | 81.1 | 69.9 | 69.2 | 69.6 | 78.6 | 65.9 | 71.4 | 73.7 | 69.6 | 72.4 | 64.9 | 63.2 | 73.5 | 67.3 | 74.2 | 65.2  | 66.9 | 70.0 | 78.4 |
|                        | value       | 3.2  | 1.3  | 3.4  | 4.5  | 0.8  | 1.6  | 3.5  | 0.0  | 0.2  | 3.6  | 0.2  | 1.2  | 9.4  | 8.5  | 9.2  | 7.0  | 7.3  | 4.8  | 1.2  | 3.1  | 1.5  | 7.2  | 8.2  | 7.5  | 8.6  | 3.5  | 8.4  | 4.9  | 8.2  | 3.8  | 1.3  | 0.8  | 6.9  | 3.4  | 4.7  | 6.8  | 7.1  | 5.3  | 3.1  | 4.5  | 1.0  | 2.7  | 9.0  | -1.7  | 0.4  | 5.4  | 6.8  |
| Diet low in legumes    | lower limit | -6.5 | -2.5 | 1.5  | 2.7  | -7.7 | 0.3  | 1.3  | -1.4 | -4.3 | 2.2  | -0.8 | 0.0  | 1.4  | 1.0  | 6.4  | 0.2  | 4.2  | 3.2  | -1.5 | 1.2  | -0.4 | 4.0  | 6.5  | 4.0  | 5.6  | 1.8  | 4.7  | 1.9  | 3.1  | 1.9  | 0.1  | -0.5 | -5.1 | 0.1  | 1.7  | 2.5  | 4.5  | 3.0  | 0.6  | 0.4  | -0.2 | -5.6 | 0.1  | -15.5 | -0.9 | -5.9 | 1.5  |
|                        | upper limit | 5.7  | 2.6  | 5.3  | 6.1  | 2.7  | 3.1  | 5.4  | 1.8  | 2.1  | 4.9  | 1.2  | 2.7  | 17.9 | 16.7 | 12.1 | 14.3 | 11.1 | 6.4  | 2.5  | 5.1  | 2.8  | 10.2 | 10.1 | 11.0 | 11.6 | 5.1  | 12.3 | 7.3  | 12.3 | 5.9  | 3.1  | 3.1  | 11.0 | 5.7  | 8.1  | 11.6 | 10.1 | 8.0  | 5.1  | 9.5  | 2.0  | 4.7  | 14.5 | 3.3   | 2.3  | 8.6  | 10.3 |
|                        | value       | 17.1 | 18.2 | 18.1 | 12.6 | 18.0 | 14.3 | 15.3 | 17.1 | 16.7 | 17.7 | 17.2 | 16.4 | 17.4 | 22.2 | 22.5 | 17.6 | 15.4 | 13.7 | 10.3 | 13.2 | 6.8  | 2.2  | 2.4  | 16.4 | 11.7 | 16.2 | 12.2 | 14.1 | 16.9 | 15.1 | 16.2 | 9.8  | 16.3 | 9.2  | 17.2 | 15.7 | 16.9 | 16.4 | 10.6 | 11.9 | 18.9 | 15.3 | 11.6 | 12.5  | 15.6 | 16.3 | 15.6 |
| High temperature       | lower limit | 4.6  | 5.3  | 5.0  | 1.6  | 4.8  | 2.6  | 3.5  | 2.9  | 3.0  | 3.6  | 3.0  | 3.1  | 5.1  | 8.2  | 9.2  | 6.1  | 4.0  | 2.3  | 1.0  | 2.0  | 0.7  | 0.3  | 0.3  | 4.3  | 1.4  | 4.1  | 1.5  | 2.4  | 3.5  | 2.7  | 3.6  | 0.9  | 3.6  | 1.0  | 4.5  | 3.0  | 4.2  | 4.3  | 1.0  | 1.5  | 5.7  | 3.0  | 1.5  | 1.8   | 3.8  | 4.3  | 3.0  |
|                        | upper limit | 27.6 | 29.0 | 28.6 | 20.8 | 29.1 | 23.9 | 25.5 | 28.4 | 27.8 | 29.3 | 28.4 | 27.4 | 27.2 | 33.0 | 32.8 | 27.1 | 25.0 | 23.0 | 16.9 | 22.2 | 12.0 | 4.7  | 5.0  | 26.9 | 19.5 | 26.8 | 20.2 | 22.9 | 28.0 | 25.1 | 26.8 | 16.4 | 27.1 | 15.2 | 27.8 | 26.2 | 27.8 | 26.6 | 17.8 | 19.9 | 29.6 | 25.4 | 19.3 | 20.8  | 26.1 | 26.5 | 26.2 |
|                        | value       | 3.0  | 0.0  | 0.1  | 0.5  | 0.3  | -0.1 | 0.4  | 0.0  | 0.2  | 0.0  | -0.1 | -0.1 | 0.0  | 0.1  | 1.0  | 0.0  | 0.2  | 0.0  | 0.7  | 0.1  | 0.3  | 0.6  | 0.2  | 0.1  | 0.4  | 0.4  | 0.0  | 1.3  | 1.8  | -0.1 | -0.1 | -0.1 | 4.1  | -0.8 | -0.1 | 0.0  | 0.0  | 0.0  | 0.9  | 0.0  | 0.4  | 2.3  | 3.5  | -2.4  | -0.2 | 3.9  | 2.5  |
| Low temperature        | lower limit | -6.7 | -3.8 | -0.9 | -0.7 | -8.1 | -0.7 | -1.4 | -1.4 | -4.3 | -0.6 | -1.1 | -0.6 | 0.0  | 0.0  | 0.4  | 0.0  | 0.0  | -0.4 | -2.1 | -0.9 | -1.6 | -1.0 | -0.2 | -0.5 | -0.7 | -1.2 | 0.0  | -1.1 | -1.4 | -0.8 | -0.8 | -0.9 | -5.2 | -4.0 | -0.8 | 0.0  | -0.3 | -0.7 | -1.6 | -0.6 | -0.7 | -5.7 | -2.3 | -16.0 | -1.1 | -6.2 | -1.5 |
|                        | upper limit | 5.5  | 0.9  | 0.7  | 1.3  | 2.2  | 0.4  | 1.3  | 1.8  | 2.1  | 0.5  | 0.9  | 0.3  | 0.0  | 0.3  | 1.6  | 0.2  | 0.5  | 0.5  | 1.9  | 0.7  | 1.2  | 2.3  | 0.7  | 0.7  | 1.6  | 1.9  | 0.0  | 3.0  | 3.9  | 0.7  | 0.4  | 0.5  | 7.7  | 0.4  | 0.6  | 0.0  | 0.3  | 0.6  | 1.9  | 0.1  | 1.6  | 4.2  | 6.5  | 2.2   | 0.6  | 7.0  | 4.9  |
|                        | value       | 0.3  | 1.3  | 3.3  | 4.1  | 0.5  | 1.7  | 3.1  | 0.0  | 0.0  | 3.5  | 0.3  | 1.3  | 9.3  | 8.5  | 8.3  | 7.0  | 7.1  | 4.8  | 0.5  | 3.0  | 1.2  | 6.6  | 8.0  | 7.4  | 8.2  | 3.1  | 8.4  | 3.6  | 6.5  | 3.8  | 1.4  | 0.9  | 2.9  | 4.2  | 4.8  | 6.8  | 7.1  | 5.3  | 2.3  | 4.5  | 0.6  | 0.5  | 5.7  | 0.7   | 0.6  | 1.5  | 4.4  |
|                        | lower limit | 0.1  | 0.6  | 1.6  | 2.7  | 0.2  | 0.5  | 1.6  | 0.0  | 0.0  | 2.5  | 0.0  | 0.3  | 1.4  | 1.0  | 5.0  | 0.1  | 3.9  | 3.1  | 0.2  | 1.3  | 0.3  | 3.2  | 6.2  | 3.7  | 4.9  | 1.5  | 4.7  | 1.8  | 2.6  | 2.1  | 0.3  | 0.0  | 0.1  | 2.9  | 1.9  | 2.5  | 4.5  | 3.0  | 1.0  | 0.7  | 0.2  | 0.1  | 0.5  | 0.1   | 0.0  | 0.1  | 1.6  |
|                        | upper       | 0.5  | 2.2  | 5.3  | 5.5  | 0.9  | 3.2  | 4.8  | 0.1  | 0.0  | 4.8  | 0.8  | 2.7  | 17.9 | 16.7 | 11.6 | 14.3 | 11.1 | 6.4  | 1.1  | 5.1  | 2.2  | 9.9  | 9.9  | 11.2 | 11.6 | 4.9  | 12.4 | 5.5  | 10.3 | 5.9  | 3.2  | 3.2  | 5.2  | 5.8  | 8.0  | 11.6 | 10.1 | 8.0  | 3.9  | 9.5  | 1.2  | 0.8  | 10.5 | 1.6   | 2.5  | 2.5  | 7.1  |

| limit                        |             |      |      |      |      |      |      |      |      |      |      |      |      |      |      |      |      |      |      |      |      |      |      |      |      |      |      |      |      |      |      |      |      |      |      |      |      |      |      |      |      |      |      |      |      |      |      |      |
|------------------------------|-------------|------|------|------|------|------|------|------|------|------|------|------|------|------|------|------|------|------|------|------|------|------|------|------|------|------|------|------|------|------|------|------|------|------|------|------|------|------|------|------|------|------|------|------|------|------|------|------|
| Impaired kidney function     | value       | 11.9 | 12.8 | 13.6 | 13.5 | 14.7 | 13.0 | 12.6 | 14.3 | 16.3 | 10.8 | 13.8 | 13.3 | 10.7 | 12.2 | 13.2 | 10.4 | 10.6 | 12.1 | 19.0 | 16.6 | 20.8 | 16.9 | 16.9 | 17.3 | 17.9 | 9.3  | 11.4 | 11.6 | 10.8 | 7.5  | 8.2  | 8.2  | 8.1  | 7.8  | 8.1  | 10.6 | 12.1 | 10.1 | 11.2 | 10.2 | 9.3  | 9.2  | 10.5 | 9.3  | 11.1 | 8.9  | 13.9 |
|                              | lower limit | 7.9  | 8.6  | 9.6  | 9.4  | 10.6 | 8.8  | 8.3  | 10.4 | 12.3 | 7.2  | 9.9  | 9.6  | 7.2  | 8.8  | 9.6  | 6.2  | 6.3  | 8.9  | 14.4 | 12.5 | 16.0 | 13.3 | 13.1 | 13.7 | 13.9 | 6.4  | 8.0  | 7.8  | 7.7  | 4.9  | 5.5  | 5.5  | 5.5  | 5.2  | 5.6  | 7.8  | 9.0  | 7.1  | 8.3  | 7.0  | 6.6  | 6.5  | 7.5  | 6.5  | 8.0  | 6.1  | 10.6 |
|                              | upper limit | 16.1 | 17.2 | 17.8 | 17.8 | 18.9 | 17.4 | 17.1 | 18.3 | 20.6 | 14.7 | 17.6 | 17.4 | 14.5 | 15.8 | 17.0 | 15.0 | 15.3 | 15.4 | 23.7 | 21.0 | 25.5 | 20.6 | 20.9 | 21.2 | 22.0 | 12.6 | 14.9 | 15.6 | 14.2 | 10.3 | 11.1 | 11.3 | 11.0 | 10.6 | 10.8 | 13.7 | 15.4 | 13.2 | 14.3 | 13.6 | 12.1 | 12.2 | 13.8 | 12.2 | 14.2 | 12.0 | 17.3 |
| High LDL cholesterol         | value       | 46.8 | 44.1 | 48.9 | 46.6 | 54.6 | 39.2 | 45.3 | 56.3 | 57.6 | 54.3 | 56.9 | 56.6 | 44.5 | 57.2 | 52.0 | 41.9 | 49.7 | 43.8 | 49.5 | 46.6 | 46.0 | 50.2 | 50.4 | 53.5 | 49.0 | 36.9 | 52.7 | 44.6 | 51.4 | 42.4 | 45.1 | 44.8 | 40.3 | 35.6 | 41.5 | 29.8 | 37.3 | 40.8 | 22.8 | 39.1 | 43.1 | 49.4 | 41.1 | 43.3 | 42.0 | 39.2 | 47.3 |
|                              | lower limit | 39.0 | 36.4 | 41.3 | 38.9 | 47.5 | 30.6 | 37.3 | 49.1 | 49.8 | 46.9 | 49.5 | 49.2 | 35.7 | 49.9 | 44.0 | 33.0 | 40.3 | 35.4 | 40.8 | 37.7 | 37.4 | 42.4 | 41.9 | 45.8 | 40.2 | 29.3 | 44.5 | 37.0 | 44.2 | 34.2 | 37.1 | 36.6 | 32.0 | 27.9 | 33.8 | 22.0 | 29.3 | 32.6 | 15.7 | 30.5 | 35.4 | 41.8 | 32.9 | 35.3 | 33.8 | 30.8 | 39.5 |
|                              | upper limit | 54.8 | 52.3 | 56.8 | 54.9 | 62.0 | 47.7 | 54.0 | 64.0 | 65.4 | 62.0 | 64.5 | 64.3 | 53.4 | 64.6 | 59.9 | 51.4 | 59.4 | 52.6 | 58.4 | 55.5 | 55.1 | 58.1 | 58.7 | 61.4 | 57.7 | 45.2 | 60.8 | 52.8 | 59.0 | 50.7 | 53.4 | 53.4 | 48.5 | 43.8 | 49.9 | 38.1 | 45.9 | 49.4 | 30.9 | 48.1 | 51.4 | 58.0 | 49.9 | 51.8 | 50.4 | 48.0 | 55.1 |
| Particulate matter pollution | value       | 33.9 | 23.5 | 36.6 | 33.6 | 27.1 | 32.0 | 23.4 | 31.5 | 18.8 | 39.0 | 40.8 | 37.0 | 21.6 | 30.5 | 25.5 | 11.1 | 11.3 | 22.9 | 18.8 | 27.2 | 24.3 | 33.6 | 25.0 | 23.8 | 21.6 | 37.0 | 31.1 | 35.8 | 37.8 | 29.3 | 33.3 | 32.6 | 30.6 | 32.8 | 35.1 | 32.2 | 30.0 | 32.2 | 36.1 | 28.6 | 37.7 | 34.8 | 33.2 | 35.5 | 30.5 | 36.2 | 33.8 |
|                              | lower limit | 30.7 | 18.8 | 33.3 | 30.3 | 22.9 | 27.9 | 19.2 | 25.7 | 10.1 | 35.1 | 37.0 | 32.2 | 16.4 | 26.1 | 18.2 | 6.7  | 7.1  | 18.1 | 13.9 | 23.6 | 20.0 | 29.0 | 21.0 | 18.7 | 16.6 | 34.2 | 28.0 | 33.1 | 34.7 | 24.1 | 28.1 | 29.0 | 22.6 | 29.2 | 31.6 | 28.1 | 25.0 | 28.7 | 32.9 | 24.0 | 34.4 | 31.4 | 29.3 | 32.1 | 25.9 | 32.8 | 29.4 |
|                              | upper limit | 37.3 | 27.8 | 39.9 | 36.8 | 31.5 | 35.8 | 27.5 | 36.6 | 27.8 | 43.0 | 44.5 | 40.8 | 26.5 | 34.7 | 32.0 | 15.6 | 15.6 | 27.6 | 24.2 | 30.8 | 28.3 | 37.6 | 29.1 | 28.3 | 26.5 | 40.1 | 34.4 | 38.7 | 41.0 | 34.2 | 37.7 | 35.8 | 37.7 | 36.4 | 38.5 | 35.8 | 34.7 | 35.8 | 39.3 | 32.8 | 41.3 | 38.0 | 37.0 | 39.0 | 34.6 | 39.9 | 37.7 |

\* PAF: population attributable fraction

§ DALY: disability adjusted life years



|                  |             |      |      |      |      |      |      |      |      |      |      |      |      |      |      |      |      |      |      |      |      |      |      |      |      |      |      |      |      |      |      |      |      |      |      |      |      |      |      |      |      |      |      |      |      |      |      |      |      |      |      |      |      |      |      |      |      |      |      |      |
|------------------|-------------|------|------|------|------|------|------|------|------|------|------|------|------|------|------|------|------|------|------|------|------|------|------|------|------|------|------|------|------|------|------|------|------|------|------|------|------|------|------|------|------|------|------|------|------|------|------|------|------|------|------|------|------|------|------|------|------|------|------|------|
| Lead exposure    | lower limit | 3.4  | 0.2  | 1.0  | 0.0  | 0.0  | 0.0  | 0.1  | 0.0  | 0.0  | 1.0  | 0.4  | 0.4  | 0.3  | 0.4  | 2.0  | 2.2  | 0.5  | 0.5  | 0.0  | 0.7  | 0.7  | 0.1  | 0.0  | 0.1  | 1.1  | 2.8  | 1.0  | 3.4  | 2.1  | 2.5  | 2.0  | 1.6  | 3.2  | 1.7  | 0.8  | 1.6  | 2.0  | 3.0  | 6.5  | 2.9  | 2.4  | 1.2  | 1.5  | 1.4  | 5.2  | 1.9  | 0.9  | 1.4  | 0.7  | 0.5  | 2.4  | 0.4  | 0.1  | 1.5  | 1.4  | 0.7  | 0.0  | 0.0  | 0.0  |
|                  | upper limit | 7.7  | 3.7  | 4.9  | 3.0  | 2.7  | 1.7  | 2.9  | 2.0  | 2.1  | 4.6  | 4.0  | 3.7  | 3.6  | 3.8  | 6.0  | 6.3  | 3.9  | 4.1  | 3.0  | 4.4  | 4.3  | 3.3  | 2.4  | 3.3  | 5.0  | 7.1  | 4.6  | 8.0  | 6.2  | 6.9  | 6.2  | 5.6  | 7.7  | 5.8  | 4.4  | 5.6  | 6.1  | 7.4  | 12.1 | 7.1  | 6.6  | 4.9  | 5.4  | 5.3  | 10.1 | 6.2  | 4.8  | 5.1  | 4.1  | 4.0  | 6.5  | 4.0  | 3.2  | 5.6  | 5.4  | 4.3  | 1.3  | 1.6  | 2.1  |
|                  | value       | 5.5  | 1.8  | 2.8  | 1.2  | 1.1  | 0.4  | 1.1  | 0.6  | 0.7  | 2.7  | 2.0  | 1.9  | 1.8  | 1.9  | 3.8  | 4.2  | 2.1  | 2.1  | 1.2  | 2.5  | 2.4  | 1.4  | 0.8  | 1.5  | 2.9  | 4.9  | 2.7  | 5.6  | 4.1  | 4.6  | 4.0  | 3.5  | 5.4  | 3.7  | 2.4  | 3.5  | 3.9  | 5.1  | 9.1  | 4.9  | 4.4  | 2.9  | 3.3  | 3.3  | 7.5  | 4.0  | 2.7  | 3.1  | 2.2  | 2.1  | 4.3  | 2.0  | 1.4  | 3.5  | 3.3  | 2.3  | 0.3  | 0.3  | 0.7  |
| Tobacco          | lower limit | 3.4  | 0.2  | 1.0  | 0.0  | 0.0  | 0.0  | 0.1  | 0.0  | 0.0  | 1.0  | 0.4  | 0.4  | 0.3  | 0.4  | 2.0  | 2.2  | 0.5  | 0.5  | 0.0  | 0.7  | 0.7  | 0.1  | 0.0  | 0.1  | 1.1  | 2.8  | 1.0  | 3.4  | 2.1  | 2.5  | 2.0  | 1.6  | 3.2  | 1.7  | 0.8  | 1.6  | 2.0  | 3.0  | 6.5  | 2.9  | 2.4  | 1.2  | 1.5  | 1.4  | 5.2  | 1.9  | 0.9  | 1.4  | 0.7  | 0.5  | 2.4  | 0.4  | 0.1  | 1.5  | 1.4  | 0.7  | 0.0  | 0.0  | 0.0  |
|                  | upper limit | 7.7  | 3.7  | 4.9  | 3.0  | 2.7  | 1.7  | 2.9  | 2.0  | 2.1  | 4.6  | 4.0  | 3.7  | 3.6  | 3.8  | 6.0  | 6.3  | 3.9  | 4.1  | 3.0  | 4.4  | 4.3  | 3.3  | 2.4  | 3.3  | 5.0  | 7.1  | 4.6  | 8.0  | 6.2  | 6.9  | 6.2  | 5.6  | 7.7  | 5.8  | 4.4  | 5.6  | 6.1  | 7.4  | 12.1 | 7.1  | 6.6  | 4.9  | 5.4  | 5.3  | 10.1 | 6.2  | 4.8  | 5.1  | 4.1  | 4.0  | 6.5  | 4.0  | 3.2  | 5.6  | 5.4  | 4.3  | 1.3  | 1.6  | 2.1  |
|                  | value       | 33.1 | 31.2 | 34.0 | 18.8 | 26.2 | 33.8 | 34.7 | 42.0 | 35.7 | 32.4 | 34.1 | 31.2 | 30.3 | 31.5 | 32.9 | 38.8 | 33.0 | 40.3 | 44.0 | 27.4 | 34.1 | 30.0 | 33.4 | 31.6 | 22.2 | 31.8 | 15.0 | 25.9 | 18.6 | 22.8 | 22.3 | 20.1 | 17.1 | 32.1 | 15.2 | 9.3  | 17.1 | 22.2 | 14.0 | 17.2 | 22.7 | 29.3 | 29.9 | 27.6 | 25.9 | 35.6 | 41.1 | 42.7 | 30.2 | 34.5 | 14.2 | 16.3 | 26.8 | 30.1 | 19.3 | 24.4 | 38.1 | 43.8 | 37.1 |
| Smoking          | lower limit | 30.7 | 29.4 | 32.1 | 17.0 | 24.3 | 31.5 | 31.4 | 39.3 | 32.9 | 30.8 | 31.3 | 29.5 | 28.3 | 29.7 | 30.9 | 36.9 | 31.1 | 38.4 | 41.8 | 25.8 | 32.3 | 28.3 | 31.1 | 30.0 | 20.3 | 29.9 | 13.3 | 23.6 | 16.7 | 20.9 | 20.8 | 18.4 | 15.1 | 29.8 | 13.8 | 8.2  | 15.5 | 20.7 | 12.0 | 15.6 | 20.5 | 27.7 | 27.1 | 25.6 | 24.3 | 33.5 | 38.5 | 40.2 | 28.1 | 32.6 | 11.7 | 13.9 | 25.1 | 27.7 | 17.7 | 22.6 | 34.9 | 40.1 | 33.7 |
|                  | upper limit | 35.4 | 33.0 | 36.0 | 20.4 | 28.0 | 36.0 | 38.5 | 44.8 | 38.6 | 34.1 | 36.9 | 32.9 | 32.3 | 33.3 | 34.9 | 40.7 | 34.9 | 42.4 | 46.3 | 29.1 | 36.0 | 31.9 | 35.8 | 33.3 | 24.2 | 33.8 | 16.7 | 28.2 | 20.5 | 24.9 | 23.8 | 21.7 | 19.3 | 34.5 | 16.7 | 10.6 | 18.5 | 23.7 | 16.2 | 19.0 | 24.7 | 30.9 | 32.9 | 29.6 | 27.6 | 37.8 | 43.5 | 45.3 | 32.9 | 36.5 | 16.8 | 18.5 | 28.5 | 32.4 | 21.1 | 26.2 | 41.3 | 47.4 | 40.7 |
|                  | value       | 28.4 | 26.6 | 29.2 | 15.3 | 22.9 | 29.6 | 29.3 | 36.5 | 31.1 | 28.2 | 29.0 | 26.9 | 26.7 | 25.5 | 28.6 | 35.2 | 30.0 | 36.3 | 40.2 | 24.1 | 30.7 | 27.4 | 30.6 | 28.3 | 19.1 | 29.2 | 12.8 | 23.1 | 16.0 | 19.5 | 19.4 | 17.8 | 14.5 | 28.3 | 13.2 | 7.2  | 14.1 | 18.9 | 11.6 | 14.8 | 19.0 | 25.8 | 26.4 | 20.9 | 21.3 | 30.0 | 36.6 | 38.2 | 23.0 | 30.8 | 11.4 | 13.4 | 22.2 | 25.3 | 16.2 | 20.8 | 33.3 | 38.9 | 31.8 |
| Secondhand smoke | lower limit | 25.9 | 25.0 | 27.4 | 13.7 | 21.1 | 27.4 | 25.9 | 33.9 | 28.3 | 26.7 | 25.8 | 25.4 | 24.8 | 23.9 | 26.8 | 33.6 | 28.2 | 34.3 | 38.0 | 22.6 | 28.9 | 25.7 | 28.2 | 26.7 | 17.2 | 27.2 | 11.2 | 20.8 | 14.2 | 17.7 | 18.0 | 16.2 | 12.4 | 25.9 | 11.9 | 6.2  | 12.8 | 17.6 | 9.6  | 13.2 | 17.0 | 24.3 | 23.5 | 19.3 | 19.9 | 28.0 | 33.9 | 35.8 | 20.9 | 29.0 | 9.0  | 11.2 | 20.7 | 23.0 | 14.7 | 19.2 | 30.2 | 35.2 | 28.3 |
|                  | upper limit | 30.8 | 28.1 | 31.1 | 16.8 | 24.7 | 31.6 | 33.2 | 39.2 | 33.9 | 29.8 | 32.1 | 28.5 | 28.7 | 27.3 | 30.5 | 37.0 | 31.7 | 38.2 | 42.5 | 25.7 | 32.4 | 29.3 | 33.2 | 29.8 | 21.2 | 31.1 | 14.3 | 25.4 | 17.9 | 21.5 | 20.9 | 19.4 | 16.7 | 30.7 | 14.8 | 8.3  | 15.5 | 20.4 | 13.7 | 16.5 | 21.0 | 27.4 | 29.5 | 22.8 | 22.8 | 32.0 | 39.0 | 40.9 | 25.5 | 32.7 | 14.0 | 15.7 | 23.7 | 27.6 | 17.8 | 22.5 | 36.5 | 42.6 | 35.4 |
|                  | value       | 6.3  | 6.1  | 6.9  | 4.1  | 4.3  | 6.1  | 7.6  | 9.0  | 6.9  | 5.7  | 6.8  | 6.0  | 4.9  | 8.0  | 6.1  | 6.0  | 4.9  | 6.9  | 6.8  | 4.7  | 5.4  | 3.7  | 4.3  | 4.9  | 3.9  | 4.1  | 2.7  | 3.8  | 3.1  | 4.2  | 3.7  | 2.9  | 3.2  | 5.5  | 2.4  | 2.3  | 3.5  | 4.2  | 2.9  | 3.0  | 4.6  | 4.9  | 5.0  | 8.2  | 6.0  | 7.9  | 7.3  | 7.8  | 9.1  | 5.7  | 3.3  | 3.4  | 5.8  | 6.5  | 3.8  | 4.6  | 7.6  | 8.4  | 7.9  |
| Secondhand smoke | lower limit | 5.3  | 4.9  | 5.6  | 3.2  | 3.5  | 4.7  | 6.0  | 7.3  | 5.5  | 4.7  | 5.5  | 4.9  | 4.0  | 6.7  | 5.0  | 4.9  | 4.0  | 5.7  | 5.6  | 3.8  | 4.3  | 3.0  | 3.4  | 4.0  | 3.1  | 3.3  | 2.1  | 3.0  | 2.4  | 3.3  | 3.0  | 2.3  | 2.5  | 4.5  | 1.7  | 1.8  | 2.8  | 3.4  | 2.2  | 2.2  | 3.6  | 4.0  | 4.0  | 6.8  | 4.9  | 6.4  | 5.9  | 6.5  | 7.5  | 4.7  | 2.5  | 2.6  | 4.7  | 5.1  | 2.9  | 3.6  | 6.1  | 6.4  | 6.3  |
|                  | upper limit | 7.6  | 7.4  | 8.3  | 5.2  | 5.2  | 7.6  | 9.3  | 10.9 | 8.4  | 6.8  | 8.1  | 7.2  | 5.9  | 9.5  | 7.3  | 7.1  | 5.9  | 8.3  | 8.1  | 5.7  | 6.4  | 4.4  | 5.1  | 6.0  | 4.8  | 5.0  | 3.4  | 4.6  | 4.0  | 5.2  | 4.5  | 3.6  | 3.9  | 6.7  | 3.0  | 2.9  | 4.4  | 5.1  | 3.6  | 3.8  | 5.7  | 6.0  | 6.0  | 9.7  | 7.1  | 9.4  | 8.7  | 9.3  | 10.9 | 6.8  | 4.1  | 4.2  | 7.1  | 7.9  | 4.7  | 5.7  | 9.3  | 10.5 | 9.6  |
|                  | value       | 6.3  | 6.1  | 6.9  | 4.1  | 4.3  | 6.1  | 7.6  | 9.0  | 6.9  | 5.7  | 6.8  | 6.0  | 4.9  | 8.0  | 6.1  | 6.0  | 4.9  | 6.9  | 6.8  | 4.7  | 5.4  | 3.7  | 4.3  | 4.9  | 3.9  | 4.1  | 2.7  | 3.8  | 3.1  | 4.2  | 3.7  | 2.9  | 3.2  | 5.5  | 2.4  | 2.3  | 3.5  | 4.2  | 2.9  | 3.0  | 4.6  | 4.9  | 5.0  | 8.2  | 6.0  | 7.9  | 7.3  | 7.8  | 9.1  | 5.7  | 3.3  | 3.4  | 5.8  | 6.5  | 3.8  | 4.6  | 7.6  | 8.4  | 7.9  |



---

Alcohol use

|             |      |      |      |      |      |      |      |      |      |      |      |      |      |      |      |      |      |      |      |      |      |      |      |      |      |      |      |      |      |      |      |      |      |      |      |      |      |      |      |      |      |      |      |      |      |      |      |      |      |      |      |      |      |      |      |      |      |      |      |
|-------------|------|------|------|------|------|------|------|------|------|------|------|------|------|------|------|------|------|------|------|------|------|------|------|------|------|------|------|------|------|------|------|------|------|------|------|------|------|------|------|------|------|------|------|------|------|------|------|------|------|------|------|------|------|------|------|------|------|------|------|
| value       | -0.6 | -1.1 | -3.1 | -0.4 | -1.2 | -1.2 | -3.3 | -3.1 | -3.1 | -2.5 | -0.7 | -1.2 | -2.8 | -2.1 | -2.9 | -1.8 | -1.2 | -2.5 | -2.0 | -1.7 | -0.9 | -1.0 | -1.3 | -3.3 | -0.8 | -1.6 | -1.1 | -2.1 | -0.7 | -1.6 | -2.1 | -1.0 | -1.0 | -1.7 | -1.4 | -3.2 | -1.5 | -2.2 | -1.2 | -1.0 | -0.9 | -1.4 | -1.6 | -0.6 | 0.0  | -0.7 | -0.7 | -0.4 | 0.0  | -0.7 | -2.4 | -1.8 | -3.5 | -0.8 | -2.4 | 0.1  | -2.4 | -2.5 | -3.0 |
| lower limit | -2.9 | -2.0 | -5.0 | -2.4 | -4.1 | -2.7 | -5.4 | -5.1 | -5.0 | -4.2 | -3.1 | -3.3 | -5.1 | -4.2 | -5.2 | -4.0 | -4.8 | -5.5 | -5.4 | -5.0 | -3.6 | -4.5 | -4.3 | -7.3 | -2.8 | -3.4 | -3.1 | -4.2 | -3.2 | -4.2 | -3.7 | -3.5 | -3.1 | -3.9 | -2.9 | -5.5 | -3.0 | -4.1 | -2.1 | -3.1 | -3.0 | -3.4 | -4.8 | -1.0 | -0.2 | -1.0 | -1.1 | -0.9 | -0.1 | -1.3 | -5.0 | -5.0 | -6.0 | -3.1 | -5.2 | -2.2 | -3.8 | -5.3 | -4.8 |
| upper limit | 1.5  | 0.0  | -1.2 | 1.9  | 1.7  | 0.5  | -1.2 | -1.1 | -1.2 | -0.8 | 1.7  | 1.0  | -0.6 | 0.2  | -0.5 | 0.5  | 2.2  | 0.5  | 1.5  | 1.7  | 1.9  | 2.5  | 1.8  | 0.5  | 1.3  | 0.1  | 1.0  | 0.1  | 1.7  | 1.0  | -0.5 | 1.5  | 1.3  | 0.6  | 0.2  | -0.7 | 0.0  | -0.2 | -0.3 | 1.1  | 1.2  | 0.6  | 1.7  | -0.2 | 0.3  | -0.3 | -0.2 | 0.1  | 0.2  | -0.1 | 0.7  | 1.8  | -0.8 | 1.6  | 0.6  | 2.5  | -1.1 | 0.5  | -1.2 |

Metabolic risks

|             |      |      |      |      |      |      |      |      |      |      |      |      |      |      |      |      |      |      |      |      |      |      |      |      |      |      |      |      |      |      |      |      |      |      |      |      |      |      |      |      |      |      |      |      |      |      |      |      |      |      |      |      |      |      |      |      |      |      |      |
|-------------|------|------|------|------|------|------|------|------|------|------|------|------|------|------|------|------|------|------|------|------|------|------|------|------|------|------|------|------|------|------|------|------|------|------|------|------|------|------|------|------|------|------|------|------|------|------|------|------|------|------|------|------|------|------|------|------|------|------|------|
| value       | 80.9 | 91.1 | 87.4 | 87.9 | 84.4 | 92.1 | 88.7 | 87.4 | 89.3 | 85.3 | 86.1 | 86.7 | 90.1 | 87.8 | 84.9 | 88.4 | 86.3 | 89.4 | 90.0 | 88.0 | 90.7 | 85.6 | 87.9 | 84.0 | 85.8 | 82.5 | 85.1 | 84.4 | 86.6 | 87.4 | 85.5 | 85.8 | 84.6 | 87.1 | 82.5 | 81.7 | 85.5 | 90.5 | 84.5 | 88.8 | 88.2 | 88.0 | 87.4 | 87.4 | 86.8 | 91.3 | 90.9 | 89.8 | 90.8 | 86.4 | 85.9 | 85.4 | 88.5 | 87.0 | 83.0 | 88.8 | 90.7 | 93.1 | 87.9 |
| lower limit | 74.5 | 87.5 | 82.8 | 82.9 | 78.8 | 88.8 | 84.3 | 82.1 | 84.9 | 78.8 | 80.4 | 80.5 | 85.6 | 83.1 | 79.0 | 82.9 | 80.2 | 84.6 | 85.0 | 82.6 | 85.6 | 79.6 | 82.9 | 78.3 | 80.7 | 75.9 | 78.6 | 79.2 | 81.0 | 82.4 | 79.6 | 79.9 | 78.5 | 82.1 | 76.3 | 75.5 | 79.5 | 86.1 | 78.7 | 84.4 | 83.3 | 83.6 | 82.4 | 82.4 | 82.0 | 87.9 | 87.3 | 85.4 | 87.2 | 81.3 | 80.5 | 79.9 | 83.9 | 81.9 | 76.8 | 84.2 | 87.1 | 89.9 | 83.0 |
| upper limit | 86.7 | 94.4 | 91.8 | 92.5 | 89.8 | 94.9 | 92.6 | 92.1 | 93.2 | 91.2 | 91.3 | 92.1 | 94.0 | 92.2 | 90.0 | 93.4 | 91.7 | 93.9 | 94.2 | 92.5 | 95.1 | 90.6 | 92.2 | 89.4 | 90.8 | 88.7 | 91.0 | 89.5 | 91.7 | 92.0 | 91.1 | 91.2 | 90.5 | 91.8 | 88.6 | 87.6 | 91.0 | 94.3 | 89.6 | 92.8 | 92.6 | 92.1 | 92.0 | 91.9 | 91.3 | 94.4 | 94.1 | 93.9 | 94.1 | 91.3 | 90.8 | 90.5 | 92.7 | 91.4 | 88.7 | 92.9 | 94.0 | 95.7 | 92.4 |

High fasting plasma glucose

|             |      |      |      |      |      |      |      |      |      |      |      |      |      |      |      |      |      |      |      |      |      |      |      |      |      |      |      |      |      |      |      |      |      |      |      |      |      |      |      |      |      |      |      |      |      |      |      |      |      |      |      |      |      |      |      |      |      |      |      |
|-------------|------|------|------|------|------|------|------|------|------|------|------|------|------|------|------|------|------|------|------|------|------|------|------|------|------|------|------|------|------|------|------|------|------|------|------|------|------|------|------|------|------|------|------|------|------|------|------|------|------|------|------|------|------|------|------|------|------|------|------|
| value       | 17.3 | 24.9 | 22.8 | 34.2 | 21.9 | 37.1 | 43.5 | 38.4 | 33.0 | 30.1 | 28.1 | 33.8 | 30.8 | 20.1 | 15.0 | 36.1 | 26.6 | 35.4 | 34.4 | 17.5 | 36.0 | 14.1 | 19.0 | 24.7 | 24.2 | 30.6 | 37.8 | 19.1 | 37.1 | 37.9 | 35.5 | 36.8 | 37.2 | 36.0 | 26.6 | 17.1 | 33.1 | 32.8 | 32.5 | 34.4 | 32.9 | 24.2 | 25.9 | 32.0 | 28.3 | 31.2 | 28.8 | 34.5 | 33.1 | 23.5 | 23.9 | 28.0 | 31.8 | 25.8 | 24.1 | 27.5 | 39.1 | 32.7 | 36.1 |
| lower limit | 11.3 | 16.0 | 13.8 | 20.6 | 13.2 | 24.3 | 27.3 | 25.1 | 21.7 | 17.0 | 16.4 | 20.3 | 18.3 | 11.5 | 9.5  | 21.3 | 14.7 | 22.0 | 20.3 | 10.7 | 20.5 | 9.0  | 12.4 | 14.3 | 15.3 | 18.4 | 23.5 | 11.3 | 23.1 | 23.9 | 21.6 | 23.6 | 23.2 | 24.1 | 16.2 | 10.1 | 19.2 | 20.5 | 20.4 | 22.9 | 20.3 | 14.8 | 15.6 | 20.3 | 17.8 | 20.0 | 18.9 | 21.4 | 21.0 | 14.6 | 14.7 | 17.0 | 20.8 | 15.4 | 14.4 | 16.9 | 25.5 | 19.8 | 23.8 |
| upper limit | 26.2 | 37.0 | 34.6 | 53.5 | 34.6 | 53.8 | 62.8 | 57.0 | 48.2 | 49.1 | 45.3 | 54.0 | 49.3 | 32.5 | 22.2 | 55.9 | 43.4 | 54.3 | 54.2 | 26.8 | 57.1 | 20.3 | 26.9 | 39.5 | 36.8 | 47.0 | 57.3 | 31.0 | 55.9 | 54.9 | 54.8 | 55.2 | 55.2 | 52.5 | 42.4 | 27.6 | 52.8 | 49.2 | 49.7 | 50.3 | 50.4 | 36.8 | 40.5 | 48.6 | 42.6 | 45.8 | 42.8 | 52.6 | 49.1 | 36.8 | 37.0 | 42.9 | 45.4 | 39.5 | 38.6 | 42.0 | 55.1 | 48.5 | 52.1 |

High systolic blood pressure

|             |      |      |      |      |      |      |      |      |      |      |      |      |      |      |      |      |      |      |      |      |      |      |      |      |      |      |      |      |      |      |      |      |      |      |      |      |      |      |      |      |      |      |      |      |      |      |      |      |      |      |      |      |      |      |      |      |      |      |      |
|-------------|------|------|------|------|------|------|------|------|------|------|------|------|------|------|------|------|------|------|------|------|------|------|------|------|------|------|------|------|------|------|------|------|------|------|------|------|------|------|------|------|------|------|------|------|------|------|------|------|------|------|------|------|------|------|------|------|------|------|------|
| value       | 53.5 | 64.7 | 55.9 | 56.9 | 45.6 | 63.5 | 44.7 | 52.4 | 58.2 | 59.1 | 55.7 | 61.4 | 66.9 | 61.4 | 61.0 | 59.8 | 56.2 | 60.4 | 62.1 | 64.4 | 63.9 | 63.6 | 60.8 | 49.5 | 50.9 | 46.7 | 51.4 | 51.9 | 52.6 | 52.0 | 51.0 | 54.9 | 51.8 | 47.1 | 38.5 | 48.2 | 48.7 | 62.9 | 52.7 | 53.0 | 58.5 | 56.1 | 54.4 | 52.1 | 52.0 | 65.2 | 55.4 | 57.1 | 62.0 | 54.6 | 63.0 | 58.4 | 53.1 | 63.5 | 57.1 | 63.6 | 59.8 | 63.4 | 51.7 |
| lower limit | 44.7 | 56.8 | 47.6 | 48.3 | 37.3 | 56.1 | 35.7 | 44.2 | 50.3 | 50.3 | 47.2 | 51.8 | 58.6 | 53.0 | 51.7 | 49.9 | 46.5 | 52.0 | 52.7 | 54.2 | 54.0 | 54.2 | 52.7 | 40.8 | 42.3 | 38.1 | 42.4 | 43.6 | 43.4 | 43.1 | 42.0 | 46.1 | 43.2 | 39.0 | 30.3 | 39.4 | 40.2 | 53.7 | 44.3 | 45.0 | 50.5 | 48.7 | 46.3 | 43.4 | 44.5 | 57.6 | 47.1 | 48.7 | 54.4 | 46.4 | 55.2 | 49.8 | 44.0 | 56.3 | 48.8 | 55.5 | 51.1 | 53.5 | 42.6 |
| upper limit | 62.2 | 71.9 | 63.8 | 65.3 | 54.8 | 70.9 | 53.9 | 60.8 | 65.9 | 67.9 | 64.1 | 70.5 | 74.5 | 69.0 | 69.8 | 68.7 | 65.6 | 68.9 | 70.4 | 73.1 | 73.3 | 72.4 | 68.8 | 58.6 | 59.1 | 55.7 | 60.7 | 60.8 | 61.4 | 60.2 | 59.6 | 63.1 | 60.5 | 55.2 | 46.8 | 57.3 | 57.3 | 71.3 | 60.2 | 61.5 | 67.0 | 63.4 | 62.4 | 61.2 | 59.4 | 72.0 | 63.3 | 64.7 | 69.2 | 63.5 | 70.5 | 66.6 | 61.5 | 70.3 | 65.2 | 71.3 | 68.0 | 71.4 | 60.1 |

High body-mass

---

---

index

|             |      |      |      |      |      |      |      |      |      |      |      |      |      |      |      |      |      |      |      |      |      |      |      |      |      |      |      |      |      |      |      |      |      |      |      |      |      |      |      |      |      |      |      |      |      |      |      |      |      |      |      |      |      |      |      |      |      |      |      |
|-------------|------|------|------|------|------|------|------|------|------|------|------|------|------|------|------|------|------|------|------|------|------|------|------|------|------|------|------|------|------|------|------|------|------|------|------|------|------|------|------|------|------|------|------|------|------|------|------|------|------|------|------|------|------|------|------|------|------|------|------|
| value       | 14.6 | 26.4 | 18.0 | 17.5 | 20.5 | 40.1 | 31.1 | 37.6 | 36.0 | 29.3 | 31.9 | 26.2 | 33.7 | 35.6 | 26.3 | 27.1 | 28.1 | 31.6 | 33.7 | 29.2 | 29.2 | 28.2 | 31.4 | 25.1 | 35.2 | 25.7 | 29.0 | 28.7 | 27.1 | 29.6 | 29.6 | 27.3 | 26.6 | 30.0 | 35.3 | 27.6 | 25.4 | 28.8 | 22.2 | 32.1 | 28.2 | 32.3 | 29.2 | 34.0 | 29.8 | 36.4 | 44.7 | 34.1 | 41.5 | 34.7 | 32.0 | 30.7 | 24.8 | 32.7 | 25.3 | 35.7 | 45.8 | 43.1 | 30.6 |
| lower limit | 6.8  | 17.0 | 10.0 | 9.8  | 12.2 | 27.2 | 17.6 | 24.7 | 24.1 | 19.3 | 20.2 | 16.6 | 22.4 | 23.4 | 15.9 | 16.8 | 17.8 | 20.6 | 22.4 | 20.3 | 18.6 | 18.0 | 20.5 | 14.6 | 23.1 | 16.0 | 18.3 | 17.4 | 17.0 | 18.1 | 19.5 | 16.9 | 16.3 | 18.4 | 23.6 | 16.4 | 15.4 | 17.5 | 12.6 | 20.4 | 17.0 | 21.4 | 18.3 | 23.0 | 20.3 | 24.0 | 31.7 | 22.4 | 28.5 | 22.5 | 22.3 | 20.0 | 15.5 | 22.5 | 17.1 | 25.4 | 34.1 | 27.8 | 18.1 |
| upper limit | 24.3 | 35.7 | 27.3 | 25.3 | 30.1 | 51.6 | 45.9 | 49.7 | 47.0 | 39.8 | 43.7 | 36.9 | 45.0 | 47.6 | 37.7 | 38.0 | 38.8 | 43.0 | 45.1 | 39.2 | 39.8 | 39.2 | 42.4 | 36.4 | 46.8 | 36.0 | 40.2 | 40.7 | 37.8 | 42.1 | 40.4 | 38.4 | 37.6 | 42.1 | 46.0 | 39.4 | 36.0 | 40.6 | 32.9 | 43.7 | 40.3 | 43.7 | 40.6 | 45.2 | 40.0 | 48.6 | 56.3 | 45.9 | 53.2 | 46.5 | 42.3 | 42.0 | 34.8 | 43.1 | 33.9 | 46.4 | 56.0 | 57.2 | 43.9 |

Dietary risks

|             |      |      |      |      |      |      |      |      |      |      |      |      |      |      |      |      |      |      |      |      |      |      |      |      |      |      |      |      |      |      |      |      |      |      |      |      |      |      |      |      |      |      |      |      |      |      |      |      |      |      |      |      |      |      |      |      |      |      |      |
|-------------|------|------|------|------|------|------|------|------|------|------|------|------|------|------|------|------|------|------|------|------|------|------|------|------|------|------|------|------|------|------|------|------|------|------|------|------|------|------|------|------|------|------|------|------|------|------|------|------|------|------|------|------|------|------|------|------|------|------|------|
| value       | 57.8 | 55.8 | 60.1 | 53.9 | 50.1 | 58.4 | 62.3 | 56.4 | 57.8 | 59.7 | 62.3 | 61.3 | 61.4 | 66.7 | 62.7 | 57.4 | 59.9 | 57.6 | 60.3 | 61.2 | 57.6 | 59.7 | 59.6 | 60.8 | 47.2 | 41.5 | 51.3 | 46.7 | 52.7 | 51.5 | 50.3 | 54.3 | 50.7 | 50.8 | 58.3 | 53.8 | 53.8 | 55.3 | 50.6 | 49.1 | 57.2 | 47.5 | 53.5 | 54.3 | 53.5 | 57.0 | 54.8 | 46.5 | 55.6 | 39.3 | 50.0 | 50.8 | 54.2 | 60.5 | 58.9 | 55.2 | 54.1 | 61.6 | 60.2 |
| lower limit | 47.6 | 44.3 | 49.3 | 42.8 | 38.6 | 47.6 | 52.0 | 45.7 | 47.7 | 49.7 | 51.1 | 51.6 | 51.7 | 57.5 | 52.7 | 47.1 | 49.4 | 46.2 | 49.4 | 51.5 | 46.9 | 49.9 | 49.4 | 51.6 | 36.5 | 32.4 | 39.8 | 35.6 | 42.4 | 40.4 | 39.5 | 43.7 | 39.9 | 40.4 | 48.5 | 43.6 | 44.3 | 44.8 | 40.7 | 40.6 | 47.3 | 38.4 | 43.2 | 44.4 | 42.4 | 47.4 | 44.1 | 35.8 | 45.1 | 27.7 | 39.4 | 39.9 | 43.1 | 50.8 | 49.3 | 45.6 | 43.1 | 50.6 | 50.2 |
| upper limit | 66.7 | 65.9 | 69.0 | 63.8 | 60.3 | 67.2 | 70.4 | 63.9 | 66.5 | 67.5 | 70.1 | 69.1 | 69.1 | 73.6 | 71.4 | 67.1 | 69.1 | 67.4 | 69.7 | 70.0 | 67.1 | 66.9 | 67.8 | 68.2 | 55.8 | 49.9 | 60.1 | 55.7 | 61.3 | 60.2 | 59.1 | 62.2 | 59.2 | 59.7 | 66.0 | 62.3 | 62.5 | 64.0 | 59.4 | 57.0 | 65.9 | 55.8 | 62.5 | 61.3 | 60.9 | 63.9 | 62.2 | 53.9 | 63.0 | 45.8 | 59.2 | 60.0 | 63.9 | 68.3 | 66.5 | 63.1 | 62.3 | 69.6 | 68.4 |

Diet low in

fruits

|             |     |     |     |      |     |      |      |     |     |     |     |     |     |     |     |     |     |     |     |     |     |     |     |     |     |     |     |     |     |     |     |     |     |     |     |     |     |     |     |     |     |     |     |     |     |     |     |     |     |     |     |     |      |      |      |      |     |      |      |
|-------------|-----|-----|-----|------|-----|------|------|-----|-----|-----|-----|-----|-----|-----|-----|-----|-----|-----|-----|-----|-----|-----|-----|-----|-----|-----|-----|-----|-----|-----|-----|-----|-----|-----|-----|-----|-----|-----|-----|-----|-----|-----|-----|-----|-----|-----|-----|-----|-----|-----|-----|-----|------|------|------|------|-----|------|------|
| value       | 4.2 | 4.4 | 6.5 | 7.0  | 2.7 | 8.6  | 7.8  | 6.5 | 6.3 | 2.2 | 3.1 | 5.6 | 5.5 | 4.0 | 1.2 | 3.6 | 5.2 | 2.7 | 1.1 | 3.8 | 2.1 | 5.0 | 5.3 | 2.0 | 0.6 | 2.5 | 0.3 | 0.9 | 2.6 | 6.6 | 3.7 | 3.9 | 2.5 | 4.8 | 1.5 | 4.3 | 2.9 | 2.7 | 5.5 | 3.2 | 3.9 | 2.7 | 3.2 | 3.0 | 1.3 | 5.5 | 5.2 | 1.2 | 3.7 | 0.6 | 3.2 | 1.8 | 7.5  | 8.9  | 8.0  | 7.8  | 5.2 | 7.1  | 7.1  |
| lower limit | 1.4 | 1.3 | 2.3 | 2.8  | 0.7 | 3.7  | 3.0  | 2.3 | 2.3 | 0.6 | 0.8 | 1.9 | 1.8 | 1.2 | 0.4 | 1.2 | 1.9 | 0.7 | 0.3 | 1.2 | 0.5 | 1.6 | 1.9 | 0.5 | 0.2 | 0.7 | 0.2 | 0.3 | 0.7 | 2.4 | 1.1 | 1.1 | 0.7 | 1.5 | 0.4 | 1.4 | 0.9 | 0.7 | 1.8 | 1.1 | 1.2 | 0.9 | 0.9 | 0.9 | 0.4 | 1.9 | 1.6 | 0.3 | 1.1 | 0.2 | 1.0 | 0.5 | 3.1  | 3.8  | 3.4  | 3.4  | 1.8 | 2.6  | 2.7  |
| upper limit | 6.5 | 7.0 | 9.7 | 10.2 | 4.6 | 12.4 | 11.4 | 9.8 | 9.4 | 3.8 | 5.2 | 8.3 | 8.2 | 6.5 | 2.2 | 5.8 | 7.9 | 4.6 | 2.1 | 6.0 | 3.7 | 7.6 | 8.0 | 3.5 | 1.2 | 4.3 | 0.4 | 1.8 | 4.5 | 9.7 | 6.0 | 6.3 | 4.4 | 7.5 | 2.7 | 6.8 | 4.9 | 4.6 | 8.4 | 5.2 | 6.4 | 4.6 | 5.4 | 5.1 | 2.3 | 8.4 | 8.0 | 2.3 | 6.3 | 1.2 | 5.2 | 3.2 | 10.8 | 12.7 | 11.5 | 11.2 | 8.2 | 10.9 | 10.5 |

Diet low in

vegetables

|             |     |      |     |      |      |      |      |      |      |     |     |     |     |     |     |     |     |     |     |     |     |     |     |     |      |     |     |      |      |      |     |      |      |      |      |      |      |      |      |     |      |      |      |     |     |     |     |     |     |     |      |      |     |      |      |      |      |      |      |
|-------------|-----|------|-----|------|------|------|------|------|------|-----|-----|-----|-----|-----|-----|-----|-----|-----|-----|-----|-----|-----|-----|-----|------|-----|-----|------|------|------|-----|------|------|------|------|------|------|------|------|-----|------|------|------|-----|-----|-----|-----|-----|-----|-----|------|------|-----|------|------|------|------|------|------|
| value       | 0.4 | 7.1  | 6.0 | 7.6  | 7.9  | 9.0  | 11.6 | 11.4 | 10.0 | 0.2 | 0.4 | 4.2 | 0.6 | 0.3 | 0.4 | 1.6 | 0.8 | 0.4 | 0.4 | 0.3 | 3.5 | 1.3 | 4.1 | 5.1 | 8.7  | 3.5 | 5.4 | 7.0  | 9.0  | 7.5  | 6.1 | 8.8  | 8.1  | 8.2  | 8.5  | 7.2  | 6.9  | 8.0  | 7.4  | 6.3 | 7.3  | 7.3  | 8.3  | 4.1 | 1.1 | 1.6 | 4.1 | 0.3 | 4.0 | 0.2 | 9.6  | 9.5  | 6.1 | 9.7  | 9.1  | 8.0  | 9.4  | 11.4 | 10.7 |
| lower limit | 0.2 | 3.5  | 2.5 | 4.2  | 4.4  | 5.2  | 7.3  | 7.3  | 6.2  | 0.2 | 0.2 | 1.5 | 0.2 | 0.2 | 0.2 | 0.4 | 0.3 | 0.2 | 0.2 | 0.2 | 1.1 | 0.4 | 1.5 | 2.0 | 5.1  | 1.1 | 2.3 | 3.4  | 5.5  | 3.8  | 2.8 | 5.3  | 4.8  | 4.6  | 5.1  | 3.9  | 3.7  | 4.6  | 3.8  | 3.1 | 3.8  | 3.9  | 4.9  | 1.3 | 0.3 | 0.3 | 1.3 | 0.2 | 1.2 | 0.2 | 5.9  | 5.8  | 2.7 | 5.8  | 5.5  | 4.5  | 5.7  | 6.9  | 6.7  |
| upper limit | 0.6 | 10.4 | 9.1 | 10.9 | 11.2 | 12.6 | 15.8 | 15.4 | 13.6 | 0.3 | 0.7 | 6.5 | 1.1 | 0.5 | 0.7 | 2.9 | 1.5 | 0.8 | 0.6 | 0.4 | 5.5 | 2.4 | 6.3 | 7.8 | 12.2 | 5.5 | 8.3 | 10.3 | 12.3 | 11.0 | 9.2 | 12.1 | 11.3 | 11.7 | 11.8 | 10.4 | 10.1 | 11.2 | 10.7 | 9.3 | 10.6 | 10.5 | 11.7 | 6.5 | 1.9 | 3.0 | 6.6 | 0.4 | 6.4 | 0.2 | 13.2 | 13.1 | 9.4 | 13.4 | 12.6 | 11.3 | 12.9 | 15.7 | 14.7 |

Diet low in

whole grains

|       |      |      |      |      |      |      |      |      |      |      |      |      |      |      |      |      |      |      |      |      |      |      |      |      |      |      |      |      |      |      |      |      |      |      |      |      |      |      |      |      |      |      |      |      |      |      |      |      |      |      |      |      |      |      |      |      |      |      |      |
|-------|------|------|------|------|------|------|------|------|------|------|------|------|------|------|------|------|------|------|------|------|------|------|------|------|------|------|------|------|------|------|------|------|------|------|------|------|------|------|------|------|------|------|------|------|------|------|------|------|------|------|------|------|------|------|------|------|------|------|------|
| value | 17.4 | 17.5 | 21.0 | 14.7 | 12.4 | 21.2 | 23.1 | 22.7 | 20.1 | 24.0 | 25.0 | 23.9 | 24.8 | 25.7 | 23.3 | 14.6 | 18.2 | 20.6 | 19.3 | 16.0 | 17.7 | 21.4 | 18.8 | 19.3 | 18.4 | 15.8 | 23.5 | 17.3 | 21.7 | 17.2 | 19.3 | 21.2 | 19.2 | 16.7 | 17.8 | 15.4 | 15.5 | 18.3 | 16.4 | 12.3 | 14.4 | 15.8 | 16.0 | 23.7 | 25.1 | 22.8 | 26.2 | 24.5 | 24.9 | 24.4 | 14.9 | 14.3 | 18.2 | 17.3 | 16.4 | 12.3 | 20.3 | 23.9 | 21.4 |
| lower | 6.1  | 6.3  | 7.0  | 5.6  | 5.0  | 7.2  | 7.9  | 7.6  | 6.8  | 10.4 | 10.9 | 10.4 | 10.9 | 11.1 | 10.2 | 5.4  | 6.0  | 7.1  | 6.4  | 5.6  | 5.9  | 8.1  | 6.4  | 6.4  | 6.5  | 5.7  | 10.3 | 6.3  | 8.1  | 6.3  | 6.6  | 7.7  | 6.6  | 6.2  | 6.3  | 5.7  | 5.6  | 6.4  | 6.0  | 5.0  | 5.6  | 5.9  | 5.9  | 9.6  | 10.9 | 8.4  | 11.3 | 10.5 | 9.8  | 10.5 | 5.7  | 5.6  | 6.4  | 6.4  | 6.1  | 5.1  | 7.0  | 8.2  | 7.2  |

---



|                                         |             |     |      |      |      |      |     |      |      |      |     |      |     |     |      |     |     |     |     |     |     |     |     |     |      |     |     |     |      |     |      |     |      |     |      |      |     |     |      |     |      |      |     |     |     |      |     |     |     |     |     |      |      |      |     |      |     |      |      |      |     |
|-----------------------------------------|-------------|-----|------|------|------|------|-----|------|------|------|-----|------|-----|-----|------|-----|-----|-----|-----|-----|-----|-----|-----|-----|------|-----|-----|-----|------|-----|------|-----|------|-----|------|------|-----|-----|------|-----|------|------|-----|-----|-----|------|-----|-----|-----|-----|-----|------|------|------|-----|------|-----|------|------|------|-----|
|                                         | upper limit | 2.7 | 2.2  | 3.6  | 2.6  | 3.1  | 2.9 | 2.6  | 3.0  | 2.4  | 2.9 | 2.9  | 2.5 | 3.4 | 3.9  | 3.8 | 3.1 | 3.5 | 3.4 | 2.4 | 4.0 | 2.5 | 3.2 | 2.7 | 5.5  | 3.0 | 3.7 | 2.9 | 3.1  | 3.2 | 3.1  | 2.8 | 2.8  | 2.8 | 3.3  | 4.5  | 2.7 | 3.0 | 3.9  | 3.2 | 5.7  | 2.5  | 4.2 | 3.0 | 2.8 | 3.3  | 3.4 | 2.8 | 2.8 | 2.9 | 3.0 | 3.5  | 3.0  | 3.1  | 3.7 | 3.8  | 3.2 | 3.3  | 3.4  | 2.6  |     |
| Diet low in fiber                       | value       | 2.4 | 8.9  | 9.7  | 2.9  | 11.7 | 1.3 | 0.9  | 0.2  | 0.6  | 3.5 | 2.2  | 3.3 | 3.7 | 5.3  | 2.3 | 0.4 | 6.0 | 2.5 | 1.5 | 1.4 | 3.6 | 0.8 | 3.7 | 6.8  | 2.7 | 0.7 | 0.6 | 6.3  | 3.8 | 5.9  | 2.9 | 7.9  | 5.3 | 12.5 | 10.7 | 2.4 | 5.1 | 7.6  | 1.4 | 1.0  | 7.1  | 4.6 | 1.2 | 1.7 | 1.7  | 4.3 | 4.7 | 1.0 | 3.8 | 0.5 | 0.9  | 2.1  | 6.2  | 3.9 | 5.9  | 2.3 | 0.3  | 0.4  | 0.9  |     |
|                                         | lower limit | 0.8 | 3.8  | 4.2  | 0.9  | 5.5  | 0.4 | 0.3  | 0.2  | 0.3  | 1.1 | 0.7  | 1.1 | 1.2 | 1.8  | 0.7 | 0.2 | 2.2 | 0.8 | 0.5 | 0.5 | 1.2 | 0.3 | 1.4 | 2.8  | 0.8 | 0.3 | 0.3 | 2.4  | 1.1 | 2.1  | 0.9 | 3.2  | 1.9 | 6.2  | 5.1  | 0.8 | 1.8 | 3.1  | 0.5 | 0.4  | 2.8  | 1.8 | 0.4 | 0.6 | 0.6  | 1.4 | 1.6 | 0.4 | 1.2 | 0.2 | 0.3  | 0.6  | 2.4  | 1.2 | 2.1  | 0.8 | 0.2  | 0.2  | 0.3  |     |
|                                         | upper limit | 4.3 | 13.9 | 15.0 | 5.5  | 17.1 | 2.7 | 2.0  | 0.2  | 1.2  | 6.4 | 4.3  | 6.3 | 6.8 | 9.2  | 4.5 | 0.7 | 9.8 | 4.9 | 3.1 | 2.8 | 6.6 | 1.6 | 6.6 | 11.0 | 5.3 | 1.3 | 1.1 | 10.7 | 7.3 | 9.9  | 5.5 | 12.6 | 9.0 | 18.2 | 15.9 | 4.6 | 8.7 | 12.1 | 2.8 | 1.9  | 11.5 | 7.7 | 2.3 | 3.4 | 3.3  | 7.7 | 8.4 | 2.1 | 7.1 | 0.9 | 1.9  | 4.1  | 10.5 | 7.1 | 10.0 | 4.4 | 0.6  | 0.9  | 1.8  |     |
| Diet low in seafood omega-3 fatty acids | value       | 4.1 | 3.6  | 4.3  | 3.9  | 3.8  | 4.4 | 5.0  | 3.7  | 4.3  | 3.6 | 3.9  | 3.7 | 3.7 | 3.9  | 3.6 | 3.6 | 3.5 | 3.7 | 3.5 | 3.5 | 3.4 | 3.4 | 3.6 | 3.0  | 3.8 | 3.7 | 3.3 | 3.8  | 3.4 | 4.0  | 3.6 | 3.1  | 3.1 | 3.8  | 3.9  | 3.9 | 3.6 | 3.7  | 4.2 | 3.8  | 3.9  | 3.7 | 3.9 | 4.2 | 4.2  | 4.5 | 4.1 | 3.6 | 4.5 | 3.9 | 4.3  | 4.2  | 3.7  | 4.4 | 4.1  | 4.1 | 4.3  | 4.8  | 5.3  |     |
|                                         | lower limit | 1.8 | 2.5  | 2.4  | 1.4  | 2.3  | 2.3 | 1.9  | 1.8  | 1.9  | 2.2 | 1.6  | 1.8 | 2.3 | 2.2  | 2.2 | 1.4 | 2.0 | 1.8 | 1.8 | 1.6 | 2.0 | 2.2 | 2.3 | 2.1  | 2.2 | 1.8 | 2.0 | 2.4  | 2.1 | 2.4  | 2.5 | 2.6  | 2.6 | 2.5  | 2.4  | 1.7 | 2.4 | 2.4  | 2.1 | 2.3  | 2.5  | 2.4 | 2.1 | 1.3 | 2.1  | 1.8 | 2.4 | 2.1 | 1.8 | 2.1 | 2.6  | 2.2  | 2.5  | 1.3 | 2.0  | 2.5 | 2.7  | 2.4  | 2.5  |     |
|                                         | upper limit | 5.3 | 4.4  | 5.5  | 5.2  | 4.8  | 5.5 | 6.7  | 4.7  | 5.7  | 4.5 | 5.1  | 4.7 | 4.5 | 4.9  | 4.4 | 4.7 | 4.3 | 4.6 | 4.4 | 4.5 | 4.2 | 4.0 | 4.3 | 3.8  | 4.8 | 4.6 | 4.1 | 4.6  | 4.1 | 5.0  | 4.5 | 3.5  | 3.5 | 4.7  | 4.8  | 5.1 | 4.4 | 4.5  | 5.3 | 4.6  | 4.9  | 4.5 | 4.9 | 5.7 | 5.3  | 6.0 | 5.1 | 4.5 | 5.9 | 4.9 | 5.4  | 5.4  | 4.5  | 5.9 | 5.2  | 5.0 | 5.5  | 6.3  | 6.9  |     |
| Diet low in polyunsaturated fatty acids | value       | 4.5 | 3.9  | 5.8  | 6.4  | 4.6  | 1.9 | 6.3  | 5.3  | 5.3  | 4.2 | 5.1  | 4.4 | 3.2 | 6.0  | 4.7 | 4.4 | 2.2 | 3.5 | 4.6 | 3.8 | 3.6 | 3.7 | 4.3 | 2.9  | 2.0 | 2.6 | 3.5 | 0.9  | 1.5 | 5.3  | 2.5 | 4.1  | 3.6 | 1.1  | 2.2  | 4.0 | 3.3 | 2.0  | 3.0 | 3.4  | 1.6  | 1.0 | 1.1 | 3.1 | 2.0  | 3.5 | 2.2 | 1.3 | 1.6 | 4.2 | 5.4  | 5.8  | 0.7  | 4.4 | 5.3  | 2.4 | 4.7  | 5.9  | 5.8  |     |
|                                         | lower limit | 0.6 | 0.4  | 0.7  | 0.9  | 0.4  | 0.3 | 0.6  | 0.5  | 0.5  | 0.4 | 0.5  | 0.4 | 0.3 | 0.8  | 0.5 | 0.4 | 0.3 | 0.4 | 0.5 | 0.4 | 0.4 | 0.4 | 0.4 | 0.3  | 0.3 | 0.3 | 0.4 | 0.3  | 0.3 | 0.5  | 0.3 | 0.6  | 0.5 | 0.4  | 0.4  | 0.4 | 0.4 | 0.3  | 0.4 | 0.4  | 0.3  | 0.3 | 0.3 | 0.3 | 0.3  | 0.3 | 0.4 | 0.3 | 0.3 | 0.3 | 0.4  | 0.6  | 0.7  | 0.3 | 0.5  | 0.6 | 0.3  | 0.4  | 0.5  | 0.6 |
|                                         | upper limit | 9.2 | 8.4  | 11.8 | 12.4 | 9.6  | 4.7 | 12.7 | 10.9 | 10.7 | 8.9 | 10.4 | 9.0 | 7.2 | 11.9 | 9.6 | 9.1 | 4.9 | 7.6 | 9.4 | 7.9 | 7.7 | 7.9 | 8.9 | 6.5  | 4.7 | 5.9 | 7.4 | 1.9  | 3.5 | 10.9 | 5.8 | 8.5  | 7.6 | 2.3  | 4.8  | 8.3 | 7.1 | 4.7  | 6.6 | 7.6  | 3.7  | 2.3 | 2.4 | 7.0 | 4.6  | 7.6 | 5.0 | 3.1 | 3.5 | 8.9 | 11.1 | 11.7 | 1.4  | 9.3 | 10.7 | 5.4 | 10.0 | 12.3 | 11.8 |     |
| Diet high in trans fatty acids          | value       | 6.2 | 6.4  | 5.3  | 5.0  | 4.5  | 5.7 | 6.1  | 5.7  | 5.5  | 6.0 | 11.5 | 6.9 | 4.1 | 6.4  | 6.1 | 4.1 | 5.7 | 5.7 | 6.2 | 6.1 | 5.7 | 4.6 | 5.8 | 5.5  | 5.4 | 5.1 | 5.1 | 4.8  | 5.3 | 5.5  | 5.3 | 5.2  | 5.2 | 5.4  | 10.1 | 8.8 | 6.8 | 8.3  | 6.4 | 10.5 | 8.3  | 8.0 | 7.9 | 6.1 | 12.4 | 7.6 | 7.8 | 7.2 | 7.9 | 4.1 | 4.9  | 4.9  | 5.1  | 4.7 | 4.5  | 4.4 | 5.7  | 6.4  | 5.7  |     |
|                                         | lower limit | 0.6 | 0.6  | 1.0  | 1.0  | 1.1  | 1.0 | 1.1  | 1.0  | 1.0  | 0.8 | 0.7  | 1.1 | 0.8 | 0.8  | 0.9 | 0.8 | 1.1 | 0.8 | 0.9 | 1.0 | 1.0 | 1.2 | 1.1 | 0.6  | 1.4 | 1.4 | 1.3 | 1.1  | 1.3 | 1.5  | 1.3 | 1.3  | 1.4 | 1.4  | 1.0  | 1.0 | 0.9 | 1.0  | 1.0 | 2.0  | 1.2  | 0.7 | 0.8 | 0.8 | 0.8  | 0.8 | 0.7 | 0.4 | 0.8 | 0.6 | 0.8  | 0.8  | 1.0  | 1.1 | 1.1  | 1.1 | 1.1  | 1.1  | 1.1  | 1.1 |

|                                  |             |      |      |      |      |      |      |      |      |      |      |      |      |      |      |      |      |      |      |      |      |      |      |      |      |      |      |      |      |      |      |      |      |      |      |      |      |      |      |      |      |      |      |      |      |      |      |      |      |      |      |      |      |      |      |      |      |      |      |      |
|----------------------------------|-------------|------|------|------|------|------|------|------|------|------|------|------|------|------|------|------|------|------|------|------|------|------|------|------|------|------|------|------|------|------|------|------|------|------|------|------|------|------|------|------|------|------|------|------|------|------|------|------|------|------|------|------|------|------|------|------|------|------|------|------|
|                                  | upper limit | 8.4  | 8.5  | 8.8  | 8.3  | 8.1  | 9.3  | 9.7  | 9.2  | 8.8  | 8.8  | 15.4 | 10.0 | 7.2  | 9.3  | 8.9  | 7.3  | 8.9  | 8.8  | 9.1  | 9.0  | 8.8  | 8.4  | 9.0  | 8.0  | 9.6  | 8.9  | 9.0  | 8.5  | 9.2  | 9.6  | 9.2  | 9.1  | 9.1  | 9.5  | 13.2 | 11.7 | 9.6  | 11.3 | 9.7  | 14.0 | 11.5 | 10.6 | 10.6 | 9.0  | 16.6 | 10.3 | 10.4 | 9.5  | 10.6 | 6.6  | 7.9  | 7.9  | 8.6  | 8.3  | 8.3  | 7.9  | 9.0  | 10.1 | 9.3  |
| Diet high in sodium              | value       | 20.3 | 12.8 | 11.7 | 12.5 | 11.3 | 8.3  | 6.5  | 2.3  | 8.6  | 7.3  | 6.9  | 7.5  | 7.4  | 7.1  | 18.7 | 18.2 | 18.1 | 18.4 | 18.9 | 18.7 | 18.8 | 3.7  | 7.9  | 6.5  | 4.3  | 4.3  | 4.3  | 4.2  | 4.3  | 4.2  | 4.2  | 4.5  | 4.3  | 4.3  | 6.5  | 6.6  | 13.3 | 9.5  | 7.7  | 5.8  | 9.6  | 7.2  | 7.1  | 2.1  | 2.2  | 2.3  | 2.4  | 2.2  | 2.3  | 1.5  | 4.3  | 4.2  | 12.3 | 4.6  | 4.2  | 3.7  | 3.3  | 5.6  | 7.6  |
|                                  | lower limit | 9.3  | 1.9  | 1.7  | 1.7  | 1.7  | 0.7  | 0.6  | 0.3  | 0.7  | 0.6  | 0.5  | 0.6  | 0.6  | 0.6  | 6.7  | 6.0  | 6.3  | 6.3  | 6.5  | 6.4  | 6.5  | 0.2  | 0.8  | 0.3  | 0.2  | 0.2  | 0.2  | 0.2  | 0.2  | 0.2  | 0.2  | 0.2  | 0.2  | 0.2  | 0.3  | 0.3  | 3.4  | 0.8  | 0.5  | 0.3  | 0.8  | 0.5  | 0.3  | 0.3  | 0.3  | 0.3  | 0.3  | 0.3  | 0.3  | 0.2  | 0.2  | 1.6  | 0.2  | 0.2  | 0.2  | 0.2  | 0.4  | 0.6  |      |
|                                  | upper limit | 33.1 | 26.3 | 24.5 | 25.7 | 23.9 | 19.8 | 16.6 | 8.6  | 20.0 | 18.8 | 18.3 | 19.3 | 19.3 | 18.1 | 32.4 | 31.7 | 31.8 | 32.0 | 32.7 | 32.8 | 32.8 | 12.5 | 19.4 | 17.9 | 14.1 | 14.0 | 14.6 | 14.1 | 14.6 | 14.2 | 14.3 | 14.7 | 14.3 | 14.2 | 17.3 | 17.9 | 26.1 | 22.1 | 19.2 | 16.7 | 22.2 | 18.9 | 19.0 | 7.9  | 8.3  | 9.0  | 8.9  | 8.5  | 8.3  | 6.2  | 16.5 | 16.4 | 25.5 | 17.7 | 16.4 | 14.8 | 12.0 | 15.5 | 18.5 |
| Low physical activity            | value       | 3.5  | 6.0  | 5.0  | 2.4  | 3.7  | 4.0  | 4.4  | 5.1  | 4.6  | 3.5  | 2.9  | 3.4  | 4.1  | 3.0  | 3.1  | 3.3  | 3.2  | 3.0  | 3.3  | 4.6  | 3.5  | 3.7  | 3.4  | 1.0  | 6.6  | 8.1  | 7.2  | 8.8  | 6.1  | 6.0  | 8.4  | 7.0  | 7.2  | 6.5  | 3.9  | 4.1  | 3.1  | 1.7  | 0.7  | 3.8  | 1.4  | 11.2 | 3.3  | 9.7  | 7.5  | 9.5  | 6.9  | 10.4 | 9.4  | 8.4  | 4.9  | 3.8  | 5.0  | 3.6  | 6.0  | 5.3  | 6.0  | 3.3  | 4.0  |
|                                  | lower limit | 1.0  | 1.6  | 1.4  | 0.6  | 0.9  | 1.1  | 1.1  | 1.7  | 1.4  | 1.2  | 0.9  | 1.1  | 1.4  | 0.9  | 1.0  | 1.0  | 1.1  | 1.0  | 1.0  | 1.7  | 1.2  | 1.3  | 1.2  | 0.3  | 2.0  | 2.7  | 2.4  | 2.9  | 1.8  | 1.6  | 3.1  | 2.2  | 2.3  | 1.9  | 0.9  | 0.9  | 0.7  | 0.4  | 0.3  | 0.9  | 0.4  | 4.6  | 0.7  | 4.0  | 2.7  | 3.8  | 2.4  | 4.5  | 3.6  | 3.2  | 1.4  | 1.1  | 1.3  | 0.9  | 1.8  | 1.7  | 1.9  | 0.8  | 1.2  |
|                                  | upper limit | 8.2  | 13.5 | 11.8 | 6.4  | 9.1  | 9.7  | 10.8 | 11.1 | 10.5 | 7.9  | 7.1  | 7.8  | 9.0  | 7.1  | 7.3  | 7.7  | 7.3  | 7.3  | 7.7  | 9.9  | 8.0  | 8.0  | 7.5  | 3.3  | 14.4 | 15.7 | 14.7 | 17.2 | 13.4 | 13.9 | 15.9 | 14.4 | 14.5 | 14.3 | 9.9  | 10.0 | 8.0  | 5.0  | 3.3  | 9.8  | 4.2  | 19.7 | 8.9  | 17.8 | 15.1 | 17.6 | 14.5 | 18.3 | 17.7 | 16.1 | 11.2 | 9.1  | 11.8 | 9.2  | 13.5 | 11.7 | 13.1 | 8.9  | 9.4  |
| Environmental/occupational risks | value       | 38.0 | 17.1 | 15.0 | 26.7 | 25.6 | 18.2 | 19.8 | 27.5 | 19.5 | 29.2 | 28.3 | 25.1 | 24.7 | 29.3 | 26.7 | 30.6 | 23.7 | 30.0 | 25.5 | 20.8 | 26.4 | 19.2 | 16.6 | 18.4 | 22.9 | 18.2 | 17.9 | 23.1 | 20.9 | 22.7 | 17.5 | 20.0 | 21.4 | 22.2 | 22.3 | 29.6 | 23.8 | 22.0 | 36.7 | 26.5 | 23.7 | 16.5 | 24.1 | 31.7 | 36.4 | 37.9 | 32.4 | 29.8 | 33.6 | 27.1 | 33.3 | 28.2 | 16.3 | 33.0 | 32.8 | 29.9 | 9.5  | 6.1  | 8.8  |
|                                  | lower limit | 35.0 | 12.6 | 9.3  | 19.9 | 21.3 | 9.7  | 11.8 | 20.5 | 11.4 | 22.3 | 21.9 | 19.7 | 19.0 | 22.7 | 22.2 | 25.7 | 18.8 | 25.1 | 20.9 | 16.4 | 21.4 | 14.1 | 9.9  | 13.9 | 13.5 | 12.1 | 9.9  | 15.6 | 11.1 | 13.5 | 12.9 | 11.4 | 12.0 | 13.5 | 17.5 | 25.2 | 19.8 | 18.0 | 32.8 | 22.7 | 17.9 | 12.2 | 19.0 | 25.9 | 33.1 | 33.1 | 28.0 | 25.2 | 27.1 | 23.0 | 25.9 | 20.7 | 9.1  | 27.3 | 27.9 | 25.9 | 3.7  | -6.7 | -0.2 |
|                                  | upper limit | 41.1 | 21.5 | 20.2 | 32.2 | 29.7 | 27.8 | 27.7 | 34.0 | 27.5 | 35.5 | 34.7 | 31.0 | 30.2 | 36.3 | 31.0 | 35.4 | 28.9 | 34.8 | 30.0 | 25.6 | 31.7 | 24.2 | 24.1 | 23.5 | 32.5 | 25.7 | 26.6 | 32.1 | 31.0 | 32.4 | 22.5 | 29.4 | 31.1 | 31.8 | 26.9 | 33.7 | 27.9 | 26.1 | 40.8 | 30.4 | 29.5 | 20.7 | 29.1 | 37.0 | 40.0 | 42.6 | 36.5 | 34.3 | 39.5 | 31.1 | 39.8 | 35.4 | 23.7 | 38.1 | 37.8 | 34.2 | 16.4 | 14.3 | 15.7 |
| Behavioral risks                 | value       | 71.4 | 70.3 | 73.3 | 62.8 | 63.3 | 72.8 | 75.1 | 74.6 | 72.8 | 72.2 | 74.6 | 72.8 | 72.5 | 76.3 | 74.3 | 73.5 | 72.6 | 74.0 | 77.5 | 71.8 | 72.3 | 71.6 | 72.4 | 71.5 | 61.0 | 62.6 | 60.9 | 62.9 | 63.3 | 63.7 | 63.5 | 65.3 | 61.4 | 67.7 | 64.8 | 58.1 | 61.8 | 64.4 | 56.5 | 58.7 | 66.4 | 66.2 | 67.3 | 69.3 | 67.4 | 74.1 | 74.1 | 71.7 | 70.8 | 62.6 | 57.5 | 59.0 | 66.4 | 72.4 | 67.7 | 67.3 | 72.0 | 77.9 | 74.6 |
|                                  | lower limit | 64.9 | 62.9 | 66.3 | 53.9 | 55.2 | 65.6 | 68.2 | 68.5 | 66.0 | 65.5 | 67.5 | 66.3 | 65.9 | 70.1 | 67.7 | 67.4 | 66.0 | 67.5 | 71.6 | 65.0 | 65.6 | 65.2 | 65.5 | 64.7 | 53.2 | 56.4 | 52.1 | 54.8 | 55.1 | 55.6 | 55.5 | 57.1 | 52.6 | 60.9 | 57.0 | 49.1 | 54.4 | 56.6 | 48.0 | 51.9 | 59.1 | 60.6 | 59.9 | 62.6 | 59.4 | 67.9 | 68.2 | 66.0 | 64.0 | 55.6 | 48.6 | 50.1 | 58.4 | 66.1 | 60.4 | 60.0 | 65.5 | 71.4 | 68.0 |
|                                  | upper limit | 77.2 | 76.5 | 78.8 | 70.4 | 70.4 | 78.3 | 80.4 | 78.9 | 78.0 | 77.2 | 79.9 | 77.9 | 77.8 | 81.0 | 79.9 | 79.1 | 78.8 | 79.8 | 82.7 | 78.3 | 78.3 | 76.5 | 77.6 | 76.8 | 67.4 | 68.1 | 67.7 | 69.3 | 69.7 | 70.3 | 70.1 | 71.4 | 68.1 | 73.5 | 71.0 | 65.5 | 68.8 | 71.1 | 64.2 | 64.6 | 72.9 | 71.7 | 73.5 | 74.0 | 72.7 | 78.3 | 78.5 | 76.0 | 75.7 | 67.5 | 65.0 | 66.6 | 73.2 | 77.8 | 73.7 | 73.1 | 77.0 | 82.6 | 80.0 |

---

Suboptimal  
temperature

|                |     |     |      |      |      |     |      |      |     |      |      |      |      |      |      |      |      |      |      |      |      |      |      |      |     |     |      |     |      |     |      |      |      |      |     |     |     |     |     |     |      |      |     |      |      |      |      |      |      |      |     |     |      |     |     |     |      |       |      |
|----------------|-----|-----|------|------|------|-----|------|------|-----|------|------|------|------|------|------|------|------|------|------|------|------|------|------|------|-----|-----|------|-----|------|-----|------|------|------|------|-----|-----|-----|-----|-----|-----|------|------|-----|------|------|------|------|------|------|------|-----|-----|------|-----|-----|-----|------|-------|------|
| value          | 7.6 | 1.3 | 0.5  | 2.2  | 2.5  | 1.6 | 0.3  | 0.4  | 1.5 | 7.2  | 8.4  | 7.3  | 7.7  | 10.0 | 7.5  | 6.8  | 7.2  | 7.2  | 7.0  | 6.9  | 7.1  | 6.5  | 8.0  | 7.4  | 1.1 | 1.0 | 0.9  | 2.2 | 0.5  | 1.3 | 0.4  | 0.6  | 0.6  | 0.5  | 4.2 | 5.7 | 3.7 | 3.3 | 3.5 | 5.8 | 3.1  | 2.4  | 4.2 | 8.1  | 8.5  | 8.6  | 8.4  | 8.1  | 7.0  | 7.5  | 2.1 | 1.2 | 2.8  | 5.0 | 5.3 | 7.0 | 1.3  | 0.3   | 1.1  |
| lower<br>limit | 5.5 | 0.0 | -3.7 | -4.2 | -1.8 | 0.2 | -4.2 | -0.5 | 0.3 | 2.0  | 6.3  | 3.1  | 4.1  | 8.4  | 4.4  | 2.7  | 2.7  | 2.7  | 4.1  | 2.9  | 2.0  | 1.9  | 2.3  | 4.5  | 0.1 | 0.1 | -0.5 | 1.0 | -0.5 | 0.3 | -0.8 | -0.4 | -0.4 | -0.2 | 2.9 | 3.5 | 2.1 | 1.9 | 2.3 | 3.9 | -1.1 | -0.7 | 2.3 | 4.9  | 6.6  | 5.7  | 5.4  | 5.1  | 3.7  | 4.8  | 0.1 | 0.0 | -0.3 | 2.1 | 2.9 | 5.6 | -3.0 | -14.8 | -9.5 |
| upper<br>limit | 9.9 | 2.4 | 2.6  | 3.9  | 4.0  | 3.2 | 2.2  | 1.8  | 3.1 | 12.8 | 10.5 | 11.6 | 11.3 | 11.8 | 10.7 | 11.2 | 12.4 | 11.8 | 10.4 | 11.1 | 12.5 | 11.2 | 15.7 | 10.3 | 2.1 | 2.1 | 3.4  | 3.6 | 1.6  | 2.5 | 1.5  | 1.7  | 1.6  | 1.4  | 5.5 | 7.8 | 5.0 | 4.8 | 4.7 | 7.6 | 4.7  | 4.1  | 6.3 | 11.1 | 10.5 | 11.3 | 11.4 | 11.3 | 10.1 | 10.3 | 5.1 | 2.7 | 7.7  | 8.3 | 8.0 | 8.6 | 3.1  | 4.0   | 3.5  |

Diet low in  
legumes

|                |      |      |      |      |      |      |      |      |      |      |      |      |      |      |      |      |      |      |      |      |      |      |      |      |      |      |      |      |      |      |      |      |      |      |      |      |      |      |      |     |      |     |      |      |      |      |      |      |      |     |      |      |      |      |      |      |      |      |      |
|----------------|------|------|------|------|------|------|------|------|------|------|------|------|------|------|------|------|------|------|------|------|------|------|------|------|------|------|------|------|------|------|------|------|------|------|------|------|------|------|------|-----|------|-----|------|------|------|------|------|------|------|-----|------|------|------|------|------|------|------|------|------|
| value          | 11.8 | 16.4 | 17.7 | 14.1 | 14.1 | 15.5 | 17.1 | 14.1 | 14.8 | 18.3 | 19.1 | 18.2 | 18.5 | 19.5 | 14.3 | 13.9 | 13.8 | 14.0 | 14.2 | 15.2 | 12.8 | 20.4 | 16.3 | 16.6 | 11.9 | 6.0  | 15.3 | 14.3 | 14.8 | 14.2 | 15.9 | 15.0 | 15.0 | 17.4 | 16.6 | 13.6 | 8.1  | 11.9 | 11.5 | 5.0 | 13.8 | 2.1 | 13.5 | 12.5 | 14.6 | 13.7 | 14.4 | 11.2 | 16.7 | 0.8 | 13.6 | 14.5 | 13.8 | 14.7 | 14.8 | 16.2 | 13.8 | 16.8 | 15.8 |
| lower<br>limit | 1.6  | 4.2  | 4.6  | 2.4  | 2.3  | 2.7  | 3.0  | 2.0  | 2.5  | 6.3  | 6.6  | 6.3  | 6.2  | 6.7  | 3.7  | 3.0  | 2.9  | 2.7  | 3.1  | 4.2  | 2.2  | 8.6  | 4.6  | 4.8  | 1.3  | 0.6  | 4.1  | 2.3  | 3.0  | 2.1  | 4.2  | 3.4  | 3.5  | 4.7  | 4.4  | 2.4  | 0.8  | 1.5  | 1.3  | 0.6 | 2.2  | 0.3 | 2.0  | 1.5  | 2.7  | 1.9  | 2.3  | 1.3  | 4.3  | 0.2 | 2.1  | 2.5  | 2.1  | 2.3  | 2.8  | 4.2  | 1.9  | 2.4  | 2.9  |
| upper<br>limit | 19.5 | 27.1 | 28.2 | 23.4 | 23.7 | 25.6 | 28.3 | 23.5 | 24.7 | 28.1 | 29.3 | 27.9 | 28.4 | 29.8 | 23.7 | 23.3 | 23.3 | 23.6 | 23.9 | 24.5 | 21.7 | 29.7 | 26.0 | 26.3 | 19.6 | 10.7 | 24.9 | 23.8 | 24.6 | 23.8 | 25.9 | 25.0 | 24.9 | 27.7 | 26.5 | 22.7 | 13.9 | 19.6 | 19.1 | 9.0 | 23.1 | 4.1 | 22.4 | 20.7 | 24.2 | 22.8 | 24.0 | 18.7 | 27.5 | 1.6 | 22.5 | 24.2 | 23.0 | 24.5 | 24.8 | 26.6 | 22.8 | 27.4 | 26.5 |

High  
temperature

|                |     |      |      |      |      |      |      |      |      |     |     |     |     |     |     |     |     |     |     |     |     |     |     |      |      |      |      |      |      |      |      |      |      |      |      |      |      |      |      |      |      |      |      |      |     |      |      |     |      |     |      |      |      |      |      |      |      |       |      |
|----------------|-----|------|------|------|------|------|------|------|------|-----|-----|-----|-----|-----|-----|-----|-----|-----|-----|-----|-----|-----|-----|------|------|------|------|------|------|------|------|------|------|------|------|------|------|------|------|------|------|------|------|------|-----|------|------|-----|------|-----|------|------|------|------|------|------|------|-------|------|
| value          | 0.2 | 0.2  | 0.5  | 1.2  | 1.4  | -0.1 | 0.2  | -0.1 | 0.0  | 0.1 | 0.3 | 0.1 | 0.6 | 1.0 | 0.0 | 0.0 | 0.0 | 0.0 | 0.0 | 0.0 | 0.0 | 0.0 | 0.1 | 0.1  | 0.0  | 0.0  | -0.1 | 0.0  | 0.1  | 0.0  | 0.0  | 0.1  | 0.1  | 0.0  | -0.1 | 0.0  | 0.5  | 0.0  | 0.2  | 0.0  | 1.0  | -0.5 | 0.2  | 1.4  | 0.7 | 1.2  | 0.4  | 0.0 | 0.5  | 0.2 | -0.1 | -0.1 | -0.1 | 0.0  | 0.0  | -0.1 | 0.8  | 0.2   | 0.9  |
| lower<br>limit | 0.0 | -1.0 | -3.7 | -4.6 | -2.8 | -0.8 | -4.2 | -0.6 | -0.5 | 0.0 | 0.1 | 0.0 | 0.2 | 0.4 | 0.0 | 0.0 | 0.0 | 0.0 | 0.0 | 0.0 | 0.0 | 0.0 | 0.0 | -0.1 | -0.8 | -0.8 | -0.9 | -0.6 | -0.9 | -0.7 | -1.0 | -0.9 | -0.9 | -0.7 | -0.4 | -0.3 | -0.8 | -0.8 | -0.6 | -1.0 | -3.0 | -3.5 | -0.9 | -0.7 | 0.2 | -0.9 | -0.3 | 0.0 | -1.3 | 0.1 | -0.6 | -0.8 | -0.8 | -1.2 | -0.9 | -0.5 | -3.0 | -14.8 | -9.5 |
| upper<br>limit | 0.4 | 1.2  | 2.6  | 2.8  | 2.8  | 0.4  | 2.2  | 0.6  | 0.6  | 0.1 | 0.5 | 0.1 | 1.0 | 1.6 | 0.0 | 0.0 | 0.1 | 0.1 | 0.0 | 0.1 | 0.1 | 0.1 | 0.2 | 0.3  | 1.1  | 0.9  | 0.6  | 0.5  | 1.4  | 0.6  | 0.8  | 1.6  | 1.3  | 0.9  | 0.2  | 0.2  | 1.2  | 0.4  | 0.9  | 0.4  | 2.2  | 0.5  | 1.3  | 3.2  | 1.3 | 3.2  | 1.1  | 0.1 | 2.5  | 0.3 | 0.2  | 0.4  | 0.4  | 1.4  | 1.1  | 0.1  | 2.7  | 3.7   | 3.3  |

Low  
temperature

|                |     |     |     |     |     |     |     |     |     |      |      |      |      |      |      |      |      |      |      |      |      |      |      |      |     |     |     |     |     |     |     |     |     |     |     |     |     |     |     |     |     |     |     |     |     |      |      |      |      |      |     |     |      |     |     |     |     |     |     |
|----------------|-----|-----|-----|-----|-----|-----|-----|-----|-----|------|------|------|------|------|------|------|------|------|------|------|------|------|------|------|-----|-----|-----|-----|-----|-----|-----|-----|-----|-----|-----|-----|-----|-----|-----|-----|-----|-----|-----|-----|-----|------|------|------|------|------|-----|-----|------|-----|-----|-----|-----|-----|-----|
| value          | 7.4 | 1.1 | 0.0 | 1.1 | 1.1 | 1.7 | 0.0 | 0.5 | 1.5 | 7.2  | 8.1  | 7.2  | 7.2  | 9.0  | 7.5  | 6.8  | 7.2  | 7.1  | 7.0  | 6.9  | 7.1  | 6.5  | 7.9  | 7.3  | 1.1 | 0.9 | 1.0 | 2.2 | 0.5 | 1.3 | 0.4 | 0.5 | 0.5 | 0.5 | 4.2 | 5.7 | 3.3 | 3.3 | 3.3 | 5.8 | 2.1 | 2.9 | 4.1 | 6.8 | 7.8 | 7.5  | 8.0  | 8.1  | 6.5  | 7.3  | 2.1 | 1.3 | 2.9  | 4.9 | 5.3 | 7.1 | 0.5 | 0.1 | 0.2 |
| lower<br>limit | 5.3 | 0.4 | 0.0 | 0.5 | 0.5 | 0.5 | 0.0 | 0.0 | 0.3 | 2.0  | 6.0  | 3.0  | 3.4  | 7.2  | 4.4  | 2.7  | 2.7  | 2.6  | 4.1  | 2.9  | 2.0  | 1.9  | 2.3  | 4.4  | 0.4 | 0.3 | 0.0 | 1.2 | 0.0 | 0.5 | 0.0 | 0.0 | 0.0 | 0.1 | 3.0 | 3.6 | 2.2 | 2.1 | 2.3 | 4.2 | 1.2 | 1.8 | 2.0 | 4.0 | 5.7 | 4.8  | 4.8  | 5.1  | 3.0  | 4.5  | 0.2 | 0.3 | -0.1 | 1.8 | 2.7 | 5.8 | 0.0 | 0.0 | 0.0 |
| upper<br>limit | 9.7 | 1.9 | 0.0 | 1.7 | 1.8 | 3.2 | 0.0 | 1.8 | 3.1 | 12.8 | 10.3 | 11.5 | 11.0 | 11.1 | 10.7 | 11.2 | 12.4 | 11.8 | 10.4 | 11.1 | 12.5 | 11.2 | 15.6 | 10.2 | 1.9 | 2.0 | 3.5 | 3.5 | 1.4 | 2.5 | 1.4 | 1.4 | 1.5 | 1.4 | 5.6 | 7.8 | 4.4 | 4.7 | 4.4 | 7.6 | 3.1 | 4.2 | 6.3 | 9.4 | 9.9 | 10.3 | 11.4 | 11.3 | 10.1 | 10.3 | 5.1 | 2.8 | 7.6  | 8.3 | 8.0 | 8.6 | 1.0 | 0.4 | 0.6 |

Impaired  
kidney  
function

---

---

|             |      |      |      |      |      |      |      |      |      |      |      |      |      |      |      |      |      |      |      |      |      |      |      |      |      |      |      |      |      |      |      |      |      |      |      |      |      |      |      |      |      |      |      |      |      |      |      |      |      |      |      |      |      |      |      |      |      |      |      |
|-------------|------|------|------|------|------|------|------|------|------|------|------|------|------|------|------|------|------|------|------|------|------|------|------|------|------|------|------|------|------|------|------|------|------|------|------|------|------|------|------|------|------|------|------|------|------|------|------|------|------|------|------|------|------|------|------|------|------|------|------|
| value       | 10.9 | 14.7 | 15.0 | 16.3 | 16.2 | 15.7 | 14.4 | 15.5 | 15.2 | 12.0 | 12.5 | 11.8 | 12.1 | 12.2 | 11.2 | 12.2 | 12.6 | 13.4 | 13.6 | 11.7 | 13.2 | 11.1 | 13.1 | 12.0 | 14.6 | 13.6 | 15.9 | 12.2 | 16.8 | 14.7 | 14.5 | 15.4 | 14.7 | 14.7 | 14.2 | 12.4 | 16.1 | 20.7 | 17.4 | 21.2 | 18.3 | 11.7 | 13.5 | 17.3 | 16.5 | 18.1 | 17.3 | 18.9 | 15.8 | 17.5 | 8.7  | 9.2  | 19.7 | 11.8 | 10.9 | 12.1 | 16.9 | 16.3 | 14.8 |
| lower limit | 7.2  | 10.6 | 10.8 | 11.7 | 11.6 | 11.5 | 10.6 | 11.5 | 11.1 | 8.0  | 8.8  | 7.9  | 8.4  | 8.6  | 7.7  | 8.4  | 8.8  | 9.6  | 9.8  | 8.1  | 9.0  | 6.8  | 8.8  | 8.6  | 11.1 | 9.8  | 11.8 | 9.0  | 12.7 | 11.3 | 10.7 | 11.5 | 10.8 | 11.1 | 10.7 | 8.9  | 11.7 | 16.0 | 13.3 | 16.4 | 13.9 | 8.7  | 10.3 | 13.2 | 12.5 | 14.2 | 13.6 | 14.7 | 12.4 | 13.4 | 5.8  | 6.3  | 14.6 | 8.7  | 7.8  | 8.9  | 12.7 | 12.2 | 10.8 |
| upper limit | 14.8 | 18.9 | 19.5 | 20.9 | 20.8 | 20.2 | 18.2 | 19.8 | 19.5 | 16.3 | 16.3 | 16.0 | 16.1 | 16.0 | 14.7 | 16.0 | 16.4 | 17.0 | 17.4 | 15.2 | 17.2 | 15.7 | 17.7 | 15.3 | 18.2 | 17.3 | 19.9 | 15.4 | 20.9 | 18.4 | 18.5 | 19.4 | 18.7 | 18.3 | 17.7 | 16.0 | 20.3 | 25.1 | 21.8 | 25.9 | 22.8 | 14.7 | 16.9 | 21.4 | 20.3 | 22.1 | 21.0 | 23.1 | 19.3 | 21.6 | 11.7 | 12.3 | 24.7 | 15.1 | 14.2 | 15.6 | 21.1 | 20.6 | 19.0 |

High LDL  
cholesterol

|             |      |      |      |      |      |      |      |      |      |      |      |      |      |      |      |      |      |      |      |      |      |      |      |      |      |      |      |      |      |      |      |      |      |      |      |      |      |      |      |      |      |      |      |      |      |      |      |      |      |      |      |      |      |      |      |      |      |      |      |
|-------------|------|------|------|------|------|------|------|------|------|------|------|------|------|------|------|------|------|------|------|------|------|------|------|------|------|------|------|------|------|------|------|------|------|------|------|------|------|------|------|------|------|------|------|------|------|------|------|------|------|------|------|------|------|------|------|------|------|------|------|
| value       | 44.3 | 58.7 | 55.3 | 51.0 | 54.3 | 58.2 | 59.9 | 46.5 | 54.2 | 38.7 | 46.6 | 40.7 | 46.6 | 49.9 | 46.1 | 47.8 | 48.3 | 49.6 | 49.4 | 50.2 | 52.4 | 44.7 | 53.5 | 49.3 | 49.1 | 41.9 | 40.1 | 50.8 | 44.8 | 49.6 | 44.7 | 39.5 | 39.7 | 54.1 | 48.8 | 46.2 | 48.3 | 50.6 | 45.9 | 51.6 | 44.8 | 55.2 | 53.7 | 47.2 | 50.6 | 51.7 | 57.5 | 53.1 | 54.0 | 44.8 | 41.0 | 43.0 | 54.0 | 39.3 | 38.0 | 45.2 | 52.0 | 64.2 | 52.7 |
| lower limit | 35.9 | 50.7 | 47.8 | 42.4 | 46.2 | 50.9 | 52.9 | 38.7 | 46.7 | 30.3 | 38.7 | 32.3 | 38.0 | 42.1 | 36.8 | 38.3 | 38.9 | 40.4 | 39.9 | 40.1 | 41.5 | 35.8 | 44.8 | 40.6 | 41.5 | 33.1 | 31.7 | 42.9 | 36.3 | 41.6 | 36.2 | 31.2 | 31.4 | 46.3 | 40.8 | 37.9 | 39.3 | 42.0 | 38.2 | 43.3 | 36.8 | 47.3 | 45.8 | 39.0 | 42.6 | 43.9 | 50.0 | 44.6 | 46.5 | 36.5 | 33.0 | 34.9 | 46.1 | 30.9 | 30.0 | 37.3 | 44.5 | 57.4 | 45.2 |
| upper limit | 53.4 | 66.7 | 63.1 | 59.9 | 62.8 | 65.4 | 67.4 | 54.7 | 62.2 | 47.9 | 55.1 | 49.8 | 55.5 | 58.1 | 55.9 | 57.7 | 58.3 | 58.8 | 58.7 | 60.4 | 63.1 | 54.3 | 62.9 | 58.3 | 57.4 | 51.2 | 49.1 | 58.5 | 53.5 | 57.6 | 53.7 | 48.3 | 48.5 | 62.2 | 57.0 | 55.2 | 57.4 | 59.4 | 54.3 | 60.0 | 53.1 | 63.1 | 62.1 | 55.6 | 59.0 | 59.9 | 65.1 | 62.0 | 61.5 | 53.5 | 49.5 | 51.5 | 62.4 | 47.6 | 46.4 | 53.4 | 59.9 | 71.1 | 60.4 |

Particulate  
matter  
pollution

|             |      |      |      |      |      |      |      |      |      |      |      |      |      |      |      |      |      |      |      |      |      |      |      |      |      |      |      |      |      |      |      |      |      |      |      |      |      |      |      |      |      |      |      |      |      |      |      |      |      |      |      |      |      |      |      |      |      |      |      |
|-------------|------|------|------|------|------|------|------|------|------|------|------|------|------|------|------|------|------|------|------|------|------|------|------|------|------|------|------|------|------|------|------|------|------|------|------|------|------|------|------|------|------|------|------|------|------|------|------|------|------|------|------|------|------|------|------|------|------|------|------|
| value       | 28.9 | 14.5 | 12.1 | 24.0 | 22.8 | 16.5 | 18.7 | 26.8 | 17.8 | 21.5 | 20.1 | 17.7 | 16.9 | 20.0 | 17.5 | 22.2 | 16.0 | 23.0 | 18.9 | 12.7 | 18.8 | 12.3 | 8.6  | 10.5 | 19.6 | 13.2 | 14.8 | 16.7 | 17.1 | 17.9 | 13.7 | 16.6 | 16.3 | 18.8 | 16.9 | 22.6 | 17.6 | 14.9 | 27.9 | 17.9 | 17.6 | 11.8 | 18.0 | 23.2 | 24.8 | 29.2 | 24.1 | 21.1 | 26.9 | 19.5 | 28.8 | 25.8 | 12.7 | 26.8 | 26.6 | 22.8 | 8.1  | 5.5  | 7.1  |
| lower limit | 26.4 | 10.7 | 8.1  | 18.8 | 19.3 | 7.8  | 11.8 | 19.8 | 9.9  | 15.8 | 13.2 | 13.1 | 11.9 | 12.7 | 14.0 | 18.9 | 13.0 | 19.8 | 14.9 | 10.1 | 15.9 | 9.1  | 5.0  | 6.8  | 10.1 | 6.9  | 7.1  | 9.0  | 7.4  | 8.3  | 9.4  | 7.8  | 7.2  | 10.2 | 12.1 | 18.5 | 13.8 | 11.4 | 24.0 | 14.3 | 12.5 | 8.4  | 12.8 | 17.4 | 21.7 | 24.5 | 20.4 | 16.9 | 20.7 | 16.2 | 21.6 | 18.3 | 6.5  | 21.7 | 21.5 | 19.1 | 2.8  | 1.4  | 2.9  |
| upper limit | 31.4 | 18.4 | 16.3 | 29.3 | 26.5 | 25.9 | 26.3 | 33.1 | 25.5 | 27.0 | 27.0 | 22.5 | 21.8 | 27.4 | 21.3 | 25.8 | 19.2 | 26.3 | 23.2 | 15.7 | 22.1 | 15.7 | 12.4 | 14.9 | 29.6 | 20.7 | 23.1 | 25.5 | 27.2 | 28.4 | 18.8 | 26.0 | 26.1 | 28.6 | 21.5 | 26.6 | 21.5 | 18.7 | 31.6 | 21.4 | 23.0 | 15.4 | 22.9 | 28.5 | 27.9 | 33.7 | 27.8 | 25.3 | 32.4 | 22.7 | 34.9 | 32.9 | 18.9 | 32.0 | 31.6 | 27.1 | 14.2 | 12.0 | 13.1 |

---

\* PAF: population attributable fraction

§ DALY: disability adjusted life years

**Table S22.** PAF\* of IHD<sup>§</sup> death for modifiable risk factors by sex in LMICs<sup>¶</sup> in 2019

| Upper-middle countries                   | Males |       |       | Females |       |       | Both  |       |       |
|------------------------------------------|-------|-------|-------|---------|-------|-------|-------|-------|-------|
|                                          | value | lower | upper | value   | lower | upper | value | lower | upper |
| <b>Risk Factors</b>                      |       |       |       |         |       |       |       |       |       |
| Air pollution                            | 20.4  | 22.9  | 17.9  | 17.0    | 19.2  | 14.9  | 18.8  | 21.1  | 16.6  |
| Ambient particulate matter pollution     | 17.6  | 19.9  | 15.1  | 13.8    | 16.2  | 11.6  | 15.8  | 18.0  | 13.5  |
| Household air pollution from solid fuels | 2.8   | 5.1   | 1.3   | 3.2     | 5.3   | 1.7   | 3.0   | 5.1   | 1.5   |
| Other environmental risks                | 5.1   | 7.4   | 3.1   | 3.2     | 5.2   | 1.6   | 4.2   | 6.3   | 2.4   |
| Lead exposure                            | 5.1   | 7.4   | 3.1   | 3.2     | 5.2   | 1.6   | 4.2   | 6.3   | 2.4   |
| Tobacco                                  | 34.1  | 35.6  | 32.7  | 13.1    | 14.3  | 11.9  | 24.2  | 25.8  | 22.8  |
| Smoking                                  | 31.4  | 32.9  | 30.1  | 8.1     | 8.8   | 7.3   | 20.4  | 21.9  | 19.1  |
| Secondhand smoke                         | 4.2   | 5.1   | 3.4   | 5.6     | 6.7   | 4.6   | 4.9   | 5.8   | 4.0   |
| Alcohol use                              | -1.0  | 2.1   | -4.0  | -0.9    | 0.1   | -1.8  | -1.0  | 0.7   | -2.6  |
| Metabolic risks                          | 82.0  | 88.2  | 75.4  | 81.8    | 88.9  | 73.9  | 81.9  | 88.3  | 74.8  |
| High fasting plasma glucose              | 22.4  | 34.5  | 13.5  | 21.8    | 35.4  | 12.0  | 22.1  | 34.5  | 12.7  |
| High systolic blood pressure             | 53.8  | 63.2  | 44.4  | 53.4    | 65.0  | 41.0  | 53.6  | 63.7  | 42.9  |



---

|                                         |      |      |      |      |      |      |      |      |      |
|-----------------------------------------|------|------|------|------|------|------|------|------|------|
| High body-mass index                    | 18.1 | 27.3 | 10.2 | 17.3 | 25.8 | 10.1 | 17.7 | 26.7 | 10.2 |
| Dietary risks                           | 55.2 | 63.6 | 45.7 | 49.6 | 57.9 | 40.7 | 52.6 | 60.9 | 43.3 |
| Diet low in fruits                      | 3.7  | 5.7  | 1.3  | 3.5  | 5.5  | 1.2  | 3.6  | 5.6  | 1.2  |
| Diet low in vegetables                  | 2.1  | 3.1  | 1.1  | 2.0  | 3.0  | 1.0  | 2.1  | 3.0  | 1.1  |
| Diet low in whole grains                | 17.1 | 22.1 | 6.2  | 15.3 | 19.9 | 5.6  | 16.2 | 21.1 | 5.9  |
| Diet low in nuts and seeds              | 5.2  | 7.6  | 2.5  | 5.1  | 7.5  | 2.3  | 5.2  | 7.5  | 2.3  |
| Diet high in red meat                   | 5.3  | 9.7  | 0.9  | 4.5  | 8.5  | 0.7  | 4.9  | 9.1  | 0.8  |
| Diet high in processed meat             | 1.7  | 3.5  | 0.3  | 1.8  | 3.8  | 0.3  | 1.7  | 3.6  | 0.3  |
| Diet high in sugar-sweetened beverages  | 2.4  | 3.0  | 1.6  | 2.0  | 2.7  | 1.3  | 2.2  | 2.8  | 1.5  |
| Diet low in fiber                       | 2.7  | 4.6  | 1.0  | 2.6  | 4.5  | 1.0  | 2.6  | 4.6  | 1.0  |
| Diet low in seafood omega-3 fatty acids | 3.7  | 4.7  | 2.0  | 3.5  | 4.4  | 1.8  | 3.6  | 4.5  | 1.9  |
| Diet low in polyunsaturated fatty acids | 3.6  | 7.5  | 0.4  | 3.5  | 7.2  | 0.4  | 3.6  | 7.3  | 0.4  |
| Diet high in trans fatty acids          | 6.1  | 8.4  | 0.7  | 5.8  | 8.3  | 0.8  | 6.0  | 8.4  | 0.8  |
| Diet high in sodium                     | 14.7 | 26.8 | 5.6  | 8.5  | 19.5 | 1.8  | 11.8 | 23.3 | 3.9  |
| Low physical activity                   | 4.6  | 9.9  | 1.5  | 6.8  | 13.1 | 2.7  | 5.6  | 11.4 | 2.1  |
| All risk factors                        | 94.1 | 96.2 | 91.7 | 92.4 | 95.4 | 88.8 | 93.3 | 95.8 | 90.4 |
| Environmental/occupational risks        | 29.8 | 33.2 | 26.6 | 25.5 | 28.7 | 22.3 | 27.8 | 31.0 | 24.7 |

---

|                                          |      |      |      |      |      |      |      |      |      |
|------------------------------------------|------|------|------|------|------|------|------|------|------|
| Behavioral risks                         | 70.7 | 76.0 | 64.8 | 58.7 | 65.7 | 51.4 | 65.1 | 71.1 | 58.5 |
| Suboptimal temperature                   | 7.3  | 9.7  | 5.2  | 7.4  | 10.1 | 5.1  | 7.4  | 9.9  | 5.2  |
| Diet low in legumes                      | 11.8 | 19.0 | 2.4  | 10.6 | 17.2 | 2.2  | 11.2 | 18.1 | 2.3  |
| High temperature                         | 0.2  | 0.5  | -0.1 | 0.2  | 0.5  | -0.1 | 0.2  | 0.5  | -0.1 |
| Low temperature                          | 7.1  | 9.4  | 5.0  | 7.2  | 9.8  | 4.8  | 7.1  | 9.6  | 4.9  |
| Impaired kidney function                 | 12.6 | 16.6 | 8.7  | 14.1 | 18.9 | 9.2  | 13.3 | 17.7 | 9.0  |
| High LDL cholesterol                     | 42.9 | 52.7 | 33.6 | 41.6 | 54.6 | 29.1 | 42.3 | 53.6 | 31.6 |
| Particulate matter pollution             | 20.4 | 22.9 | 17.9 | 17.0 | 19.2 | 14.9 | 18.8 | 21.1 | 16.6 |
| <b>Lower-middle countries</b>            |      |      |      |      |      |      |      |      |      |
| Air pollution                            | 28.7 | 31.5 | 26.1 | 25.6 | 28.2 | 23.2 | 27.4 | 30.0 | 25.0 |
| Ambient particulate matter pollution     | 19.8 | 23.2 | 16.1 | 15.8 | 18.7 | 12.8 | 18.1 | 21.2 | 14.8 |
| Household air pollution from solid fuels | 8.9  | 12.8 | 5.7  | 9.8  | 13.0 | 7.0  | 9.3  | 12.8 | 6.4  |
| Other environmental risks                | 6.9  | 9.2  | 4.6  | 5.1  | 7.3  | 3.2  | 6.1  | 8.3  | 4.1  |
| Lead exposure                            | 6.9  | 9.2  | 4.6  | 5.1  | 7.3  | 3.2  | 6.1  | 8.3  | 4.1  |
| Tobacco                                  | 29.8 | 31.2 | 28.4 | 10.9 | 12.1 | 9.7  | 21.7 | 22.9 | 20.5 |
| Smoking                                  | 26.9 | 28.2 | 25.6 | 5.4  | 6.0  | 4.8  | 17.7 | 18.7 | 16.7 |
| Secondhand smoke                         | 4.2  | 5.1  | 3.4  | 5.9  | 7.1  | 4.9  | 4.9  | 5.9  | 4.0  |

|                                         |      |      |      |      |      |      |      |      |      |
|-----------------------------------------|------|------|------|------|------|------|------|------|------|
| Alcohol use                             | -1.1 | 0.7  | -2.9 | -0.6 | -0.1 | -1.1 | -0.9 | 0.2  | -2.0 |
| Metabolic risks                         | 82.6 | 88.1 | 76.7 | 83.4 | 89.2 | 77.2 | 82.9 | 88.7 | 76.9 |
| High fasting plasma glucose             | 27.6 | 42.1 | 16.8 | 26.8 | 42.1 | 15.5 | 27.3 | 42.3 | 16.6 |
| High systolic blood pressure            | 54.0 | 61.6 | 46.1 | 55.9 | 64.9 | 46.9 | 54.8 | 63.2 | 46.7 |
| High body-mass index                    | 17.3 | 25.0 | 10.5 | 19.0 | 26.2 | 12.4 | 18.0 | 25.5 | 11.4 |
| Dietary risks                           | 56.6 | 64.4 | 47.3 | 52.5 | 59.9 | 43.5 | 54.9 | 62.4 | 45.7 |
| Diet low in fruits                      | 6.8  | 9.7  | 3.0  | 6.3  | 9.0  | 2.7  | 6.6  | 9.4  | 2.9  |
| Diet low in vegetables                  | 5.9  | 8.3  | 3.2  | 5.4  | 7.6  | 3.0  | 5.7  | 8.0  | 3.2  |
| Diet low in whole grains                | 16.7 | 21.7 | 6.5  | 15.0 | 19.6 | 5.9  | 16.0 | 20.9 | 6.2  |
| Diet low in nuts and seeds              | 8.1  | 10.8 | 4.6  | 7.3  | 9.7  | 4.1  | 7.8  | 10.3 | 4.4  |
| Diet high in red meat                   | 2.1  | 4.0  | 0.3  | 2.0  | 3.7  | 0.3  | 2.1  | 3.9  | 0.3  |
| Diet high in processed meat             | 1.4  | 2.7  | 0.7  | 1.3  | 2.7  | 0.6  | 1.4  | 2.7  | 0.6  |
| Diet high in sugar-sweetened beverages  | 2.0  | 2.4  | 1.4  | 1.7  | 2.2  | 1.2  | 1.8  | 2.3  | 1.3  |
| Diet low in fiber                       | 5.1  | 8.0  | 2.3  | 4.6  | 7.4  | 2.0  | 4.9  | 7.7  | 2.2  |
| Diet low in seafood omega-3 fatty acids | 4.1  | 5.4  | 1.6  | 3.9  | 5.1  | 1.6  | 4.0  | 5.3  | 1.6  |
| Diet low in polyunsaturated fatty acids | 5.1  | 10.3 | 0.6  | 4.7  | 9.5  | 0.6  | 4.9  | 10.0 | 0.6  |
| Diet high in trans fatty acids          | 8.2  | 11.0 | 0.9  | 7.6  | 10.5 | 1.1  | 8.0  | 10.7 | 1.0  |

|                                          |      |      |      |      |      |      |      |      |      |
|------------------------------------------|------|------|------|------|------|------|------|------|------|
| Diet high in sodium                      | 7.4  | 18.3 | 1.0  | 4.9  | 14.6 | 0.4  | 6.4  | 16.6 | 0.7  |
| Low physical activity                    | 4.0  | 8.8  | 1.4  | 5.2  | 10.2 | 2.2  | 4.6  | 9.5  | 1.7  |
| All risk factors                         | 94.6 | 96.4 | 92.7 | 93.5 | 95.8 | 90.9 | 94.2 | 96.2 | 91.9 |
| Environmental/occupational risks         | 36.9 | 40.0 | 33.7 | 33.0 | 35.9 | 29.7 | 35.2 | 38.2 | 32.0 |
| Behavioral risks                         | 69.9 | 75.1 | 63.7 | 59.5 | 65.9 | 52.0 | 65.4 | 71.0 | 58.7 |
| Suboptimal temperature                   | 5.1  | 6.9  | 2.5  | 5.2  | 6.8  | 2.8  | 5.1  | 6.8  | 2.7  |
| Diet low in legumes                      | 13.4 | 21.5 | 3.1  | 12.6 | 20.3 | 2.9  | 13.0 | 21.0 | 3.0  |
| High temperature                         | 0.9  | 2.2  | -1.2 | 0.8  | 2.0  | -1.2 | 0.9  | 2.1  | -1.2 |
| Low temperature                          | 4.3  | 5.7  | 2.7  | 4.4  | 5.8  | 3.0  | 4.3  | 5.7  | 2.8  |
| Impaired kidney function                 | 12.4 | 16.7 | 8.4  | 13.3 | 17.9 | 8.9  | 12.8 | 17.2 | 8.7  |
| High LDL cholesterol                     | 40.9 | 49.4 | 32.7 | 40.2 | 50.0 | 31.1 | 40.6 | 49.5 | 32.2 |
| Particulate matter pollution             | 28.7 | 31.5 | 26.1 | 25.6 | 28.2 | 23.2 | 27.4 | 30.0 | 25.0 |
| <b>Low-income countries</b>              |      |      |      |      |      |      |      |      |      |
| Air pollution                            | 35.5 | 39.4 | 32.4 | 33.6 | 38.4 | 29.9 | 34.6 | 39.0 | 31.2 |
| Ambient particulate matter pollution     | 8.6  | 13.1 | 4.9  | 5.9  | 9.2  | 3.4  | 7.4  | 11.2 | 4.2  |
| Household air pollution from solid fuels | 26.9 | 33.3 | 20.9 | 27.7 | 34.4 | 22.3 | 27.2 | 33.6 | 21.8 |
| Other environmental risks                | 7.0  | 9.5  | 4.7  | 4.7  | 6.9  | 2.7  | 5.9  | 8.3  | 3.8  |

|                                        |      |      |      |      |      |      |      |      |      |
|----------------------------------------|------|------|------|------|------|------|------|------|------|
| Lead exposure                          | 7.0  | 9.5  | 4.7  | 4.7  | 6.9  | 2.7  | 5.9  | 8.3  | 3.8  |
| Tobacco                                | 21.8 | 23.5 | 20.2 | 9.0  | 10.3 | 7.9  | 15.8 | 17.1 | 14.6 |
| Smoking                                | 19.4 | 20.9 | 17.9 | 5.3  | 6.1  | 4.5  | 12.8 | 13.9 | 11.8 |
| Secondhand smoke                       | 3.2  | 3.9  | 2.5  | 4.0  | 4.9  | 3.2  | 3.6  | 4.3  | 2.9  |
| Alcohol use                            | -2.1 | 0.0  | -4.3 | -1.3 | -0.3 | -2.3 | -1.8 | -0.5 | -3.0 |
| Metabolic risks                        | 78.6 | 84.8 | 72.3 | 78.6 | 85.3 | 72.1 | 78.6 | 85.0 | 72.2 |
| High fasting plasma glucose            | 22.3 | 34.8 | 13.3 | 22.4 | 36.2 | 13.1 | 22.4 | 35.2 | 13.3 |
| High systolic blood pressure           | 53.1 | 60.5 | 45.6 | 51.5 | 60.1 | 43.3 | 52.4 | 60.3 | 44.3 |
| High body-mass index                   | 12.2 | 19.9 | 6.1  | 14.4 | 21.8 | 8.4  | 13.2 | 20.8 | 7.3  |
| Dietary risks                          | 55.8 | 64.1 | 46.6 | 52.3 | 60.7 | 43.4 | 54.1 | 62.4 | 45.0 |
| Diet low in fruits                     | 6.4  | 9.3  | 2.6  | 6.0  | 8.8  | 2.6  | 6.2  | 9.0  | 2.6  |
| Diet low in vegetables                 | 9.1  | 12.3 | 5.7  | 8.4  | 11.4 | 5.3  | 8.7  | 11.9 | 5.5  |
| Diet low in whole grains               | 17.1 | 22.4 | 6.4  | 15.4 | 20.4 | 5.9  | 16.3 | 21.5 | 6.2  |
| Diet low in nuts and seeds             | 5.7  | 7.9  | 3.0  | 4.8  | 6.7  | 2.7  | 5.3  | 7.3  | 2.8  |
| Diet high in red meat                  | 2.6  | 4.9  | 0.2  | 2.3  | 4.3  | 0.2  | 2.4  | 4.6  | 0.2  |
| Diet high in processed meat            | 1.3  | 3.5  | 0.2  | 1.2  | 3.2  | 0.2  | 1.2  | 3.4  | 0.2  |
| Diet high in sugar-sweetened beverages | 2.5  | 2.9  | 2.1  | 2.2  | 2.6  | 1.7  | 2.3  | 2.8  | 1.9  |

|                                         |      |      |      |      |      |      |      |      |      |
|-----------------------------------------|------|------|------|------|------|------|------|------|------|
| Diet low in fiber                       | 3.7  | 6.3  | 1.5  | 3.7  | 6.1  | 1.5  | 3.7  | 6.2  | 1.5  |
| Diet low in seafood omega-3 fatty acids | 4.2  | 5.6  | 1.3  | 3.9  | 5.3  | 1.3  | 4.1  | 5.5  | 1.3  |
| Diet low in polyunsaturated fatty acids | 4.9  | 9.8  | 0.7  | 4.7  | 9.3  | 0.7  | 4.8  | 9.6  | 0.7  |
| Diet high in trans fatty acids          | 5.5  | 8.2  | 0.7  | 5.3  | 8.3  | 1.0  | 5.4  | 8.3  | 0.8  |
| Diet high in sodium                     | 7.5  | 20.1 | 0.9  | 6.7  | 18.9 | 0.6  | 7.1  | 19.6 | 0.8  |
| Low physical activity                   | 3.0  | 7.1  | 0.9  | 4.2  | 9.1  | 1.5  | 3.5  | 8.0  | 1.2  |
| All risk factors                        | 93.0 | 95.0 | 90.7 | 91.9 | 94.5 | 89.1 | 92.5 | 94.7 | 90.0 |
| Environmental/occupational risks        | 43.3 | 47.2 | 39.7 | 40.0 | 44.8 | 36.1 | 41.7 | 45.9 | 38.1 |
| Behavioral risks                        | 65.0 | 71.3 | 57.8 | 57.5 | 64.9 | 49.6 | 61.5 | 68.1 | 54.1 |
| Suboptimal temperature                  | 5.4  | 7.0  | 2.9  | 5.4  | 7.1  | 2.9  | 5.4  | 7.1  | 2.9  |
| Diet low in legumes                     | 12.6 | 20.2 | 3.0  | 11.1 | 18.0 | 2.6  | 11.9 | 19.3 | 2.8  |
| High temperature                        | 0.7  | 1.5  | -1.3 | 0.7  | 1.6  | -1.3 | 0.7  | 1.5  | -1.3 |
| Low temperature                         | 4.7  | 6.2  | 3.3  | 4.7  | 6.2  | 3.2  | 4.7  | 6.2  | 3.2  |
| Impaired kidney function                | 9.3  | 12.3 | 6.4  | 11.0 | 14.6 | 7.5  | 10.1 | 13.3 | 7.0  |
| High LDL cholesterol                    | 37.1 | 45.7 | 29.4 | 37.5 | 46.7 | 29.0 | 37.3 | 46.1 | 29.1 |
| Particulate matter pollution            | 35.5 | 39.4 | 32.4 | 33.6 | 38.4 | 29.9 | 34.6 | 39.0 | 31.2 |

\* PAF: population attributable fraction; <sup>§</sup> IHD: ischemic heart disease; <sup>¶</sup> LMIC: low- and middle-income countries

**Table S23.** PAF\* of IHD<sup>§</sup> DALY<sup>†</sup> for modifiable risk factors by sex in LMICs<sup>¶</sup> in 2019

| Upper-middle income countries            | Males |       |       | Females |       |       | Both  |       |       |
|------------------------------------------|-------|-------|-------|---------|-------|-------|-------|-------|-------|
|                                          | value | lower | upper | value   | lower | upper | value | lower | upper |
| <b>Risk Factors</b>                      |       |       |       |         |       |       |       |       |       |
| Air pollution                            | 23.4  | 20.6  | 26.1  | 20.4    | 18.0  | 22.8  | 22.2  | 19.6  | 24.7  |
| Ambient particulate matter pollution     | 20.2  | 17.2  | 22.9  | 16.5    | 13.8  | 19.2  | 18.7  | 15.9  | 21.3  |
| Household air pollution from solid fuels | 3.2   | 1.5   | 5.8   | 3.9     | 2.1   | 6.3   | 3.5   | 1.8   | 5.9   |
| Other environmental risks                | 4.7   | 2.8   | 6.8   | 3.1     | 1.5   | 5.0   | 4.0   | 2.3   | 6.1   |
| Lead exposure                            | 4.7   | 2.8   | 6.8   | 3.1     | 1.5   | 5.0   | 4.0   | 2.3   | 6.1   |
| Tobacco                                  | 40.8  | 39.4  | 42.3  | 17.2    | 15.8  | 18.6  | 31.4  | 29.9  | 33.0  |
| Smoking                                  | 38.0  | 36.6  | 39.5  | 11.1    | 10.2  | 12.1  | 27.3  | 25.7  | 28.8  |
| Secondhand smoke                         | 4.8   | 3.9   | 5.7   | 7.0     | 5.8   | 8.3   | 5.6   | 4.6   | 6.7   |
| Alcohol use                              | -0.9  | -4.3  | 2.6   | -1.0    | -2.0  | 0.2   | -0.9  | -3.0  | 1.1   |
| Metabolic risks                          | 84.5  | 79.3  | 89.4  | 83.7    | 77.4  | 89.6  | 84.2  | 78.7  | 89.3  |
| High fasting plasma glucose              | 20.8  | 13.5  | 31.4  | 21.1    | 13.1  | 32.3  | 20.9  | 13.6  | 31.5  |
| High systolic blood pressure             | 55.9  | 47.8  | 63.2  | 54.9    | 45.3  | 64.0  | 55.5  | 47.2  | 63.4  |

---

|                                         |      |      |      |      |      |      |      |      |      |
|-----------------------------------------|------|------|------|------|------|------|------|------|------|
| High body-mass index                    | 23.1 | 13.6 | 33.8 | 22.0 | 13.5 | 31.6 | 22.6 | 13.6 | 32.9 |
| Dietary risks                           | 59.0 | 49.4 | 67.1 | 52.4 | 43.2 | 60.7 | 56.3 | 46.9 | 64.5 |
| Diet low in fruits                      | 4.2  | 1.4  | 6.5  | 3.7  | 1.2  | 5.8  | 4.0  | 1.4  | 6.2  |
| Diet low in vegetables                  | 2.4  | 1.2  | 3.4  | 2.1  | 1.1  | 3.1  | 2.2  | 1.2  | 3.3  |
| Diet low in whole grains                | 19.0 | 6.9  | 24.5 | 16.6 | 6.1  | 21.6 | 18.1 | 6.6  | 23.4 |
| Diet low in nuts and seeds              | 5.6  | 2.6  | 8.1  | 5.3  | 2.4  | 7.7  | 5.5  | 2.5  | 7.9  |
| Diet high in red meat                   | 6.3  | 1.2  | 11.4 | 5.3  | 0.9  | 9.7  | 5.9  | 1.1  | 10.7 |
| Diet high in processed meat             | 1.9  | 0.3  | 4.3  | 2.0  | 0.3  | 4.2  | 2.0  | 0.3  | 4.2  |
| Diet high in sugar-sweetened beverages  | 2.4  | 1.5  | 3.1  | 2.1  | 1.3  | 2.7  | 2.3  | 1.5  | 2.9  |
| Diet low in fiber                       | 3.2  | 1.2  | 5.5  | 2.8  | 1.1  | 5.0  | 3.0  | 1.2  | 5.2  |
| Diet low in seafood omega-3 fatty acids | 4.0  | 2.1  | 5.1  | 3.7  | 1.8  | 4.7  | 3.9  | 2.0  | 4.9  |
| Diet low in polyunsaturated fatty acids | 4.0  | 0.5  | 8.3  | 3.7  | 0.5  | 7.7  | 3.9  | 0.4  | 8.1  |
| Diet high in trans fatty acids          | 6.7  | 0.8  | 9.1  | 6.3  | 0.9  | 8.9  | 6.5  | 0.8  | 9.0  |
| Diet high in sodium                     | 16.5 | 7.1  | 28.4 | 10.0 | 2.7  | 21.3 | 13.9 | 5.4  | 25.3 |
| Low physical activity                   | 3.7  | 1.2  | 8.4  | 5.7  | 2.1  | 11.5 | 4.5  | 1.6  | 9.5  |
| All risk factors                        | 95.4 | 93.7 | 96.8 | 93.5 | 90.9 | 95.7 | 94.6 | 92.6 | 96.3 |
| Environmental/occupational risks        | 31.9 | 28.5 | 35.4 | 28.1 | 25.0 | 31.4 | 30.4 | 27.2 | 33.8 |

---



|                                          |      |      |      |      |      |      |      |      |      |
|------------------------------------------|------|------|------|------|------|------|------|------|------|
| Behavioral risks                         | 75.4 | 70.1 | 79.9 | 62.2 | 55.1 | 68.7 | 70.1 | 64.0 | 75.5 |
| Suboptimal temperature                   | 7.0  | 4.9  | 9.4  | 7.0  | 4.8  | 9.5  | 7.0  | 4.8  | 9.4  |
| Diet low in legumes                      | 12.8 | 2.7  | 20.7 | 11.0 | 2.2  | 17.8 | 12.1 | 2.5  | 19.5 |
| High temperature                         | 0.2  | -0.1 | 0.5  | 0.2  | -0.1 | 0.5  | 0.2  | -0.1 | 0.5  |
| Low temperature                          | 6.8  | 4.7  | 9.1  | 6.8  | 4.6  | 9.2  | 6.8  | 4.6  | 9.1  |
| Impaired kidney function                 | 11.9 | 8.5  | 15.4 | 13.7 | 9.3  | 18.1 | 12.6 | 8.9  | 16.4 |
| High LDL cholesterol                     | 49.2 | 41.3 | 57.5 | 45.4 | 35.8 | 55.7 | 47.7 | 39.1 | 56.8 |
| Particulate matter pollution             | 23.4 | 20.6 | 26.1 | 20.4 | 18.0 | 22.8 | 22.2 | 19.6 | 24.7 |
| <b>Lower-middle income countries</b>     | 0.0  | 0.0  | 0.0  | 0.0  | 0.0  | 0.0  | 0.0  | 0.0  | 0.0  |
| Air pollution                            | 32.4 | 29.5 | 35.4 | 30.0 | 27.4 | 32.8 | 31.5 | 28.8 | 34.4 |
| Ambient particulate matter pollution     | 22.2 | 18.0 | 26.1 | 18.3 | 14.8 | 21.6 | 20.7 | 16.8 | 24.3 |
| Household air pollution from solid fuels | 10.2 | 6.5  | 14.5 | 11.7 | 8.5  | 15.3 | 10.8 | 7.4  | 14.6 |
| Other environmental risks                | 6.4  | 4.2  | 8.7  | 5.1  | 3.1  | 7.2  | 5.9  | 3.8  | 8.1  |
| Lead exposure                            | 6.4  | 4.2  | 8.7  | 5.1  | 3.1  | 7.2  | 5.9  | 3.8  | 8.1  |
| Tobacco                                  | 33.8 | 32.2 | 35.3 | 13.3 | 11.8 | 14.7 | 25.9 | 24.5 | 27.2 |
| Smoking                                  | 30.7 | 29.1 | 32.1 | 6.4  | 5.7  | 7.2  | 21.4 | 20.1 | 22.6 |
| Secondhand smoke                         | 4.6  | 3.7  | 5.5  | 7.4  | 6.0  | 8.8  | 5.7  | 4.6  | 6.8  |

---

|                                         |      |      |      |      |      |      |      |      |      |
|-----------------------------------------|------|------|------|------|------|------|------|------|------|
| Alcohol use                             | -1.1 | -3.0 | 0.9  | -0.6 | -1.0 | 0.0  | -0.9 | -2.1 | 0.4  |
| Metabolic risks                         | 84.1 | 79.0 | 88.9 | 84.3 | 79.3 | 89.0 | 84.2 | 79.2 | 88.9 |
| High fasting plasma glucose             | 24.7 | 15.8 | 37.1 | 24.3 | 15.4 | 36.8 | 24.5 | 15.4 | 36.9 |
| High systolic blood pressure            | 54.8 | 47.7 | 61.9 | 55.8 | 48.0 | 62.8 | 55.2 | 47.7 | 62.2 |
| High body-mass index                    | 21.0 | 13.2 | 29.7 | 23.3 | 15.9 | 31.3 | 21.9 | 14.2 | 30.3 |
| Dietary risks                           | 59.9 | 50.6 | 67.2 | 55.7 | 46.5 | 63.0 | 58.3 | 49.0 | 65.5 |
| Diet low in fruits                      | 7.7  | 3.4  | 11.0 | 7.1  | 3.1  | 10.1 | 7.5  | 3.3  | 10.7 |
| Diet low in vegetables                  | 6.6  | 3.6  | 9.4  | 6.2  | 3.5  | 8.6  | 6.4  | 3.6  | 9.1  |
| Diet low in whole grains                | 18.3 | 7.1  | 23.8 | 16.3 | 6.4  | 21.4 | 17.6 | 6.9  | 22.9 |
| Diet low in nuts and seeds              | 9.1  | 5.2  | 12.0 | 8.2  | 4.6  | 10.9 | 8.7  | 5.0  | 11.6 |
| Diet high in red meat                   | 2.4  | 0.3  | 4.4  | 2.1  | 0.3  | 4.1  | 2.3  | 0.3  | 4.3  |
| Diet high in processed meat             | 1.6  | 0.7  | 3.0  | 1.5  | 0.6  | 3.0  | 1.5  | 0.7  | 3.0  |
| Diet high in sugar-sweetened beverages  | 2.0  | 1.3  | 2.5  | 1.8  | 1.1  | 2.3  | 1.9  | 1.2  | 2.4  |
| Diet low in fiber                       | 5.8  | 2.6  | 9.0  | 5.2  | 2.3  | 8.1  | 5.6  | 2.5  | 8.7  |
| Diet low in seafood omega-3 fatty acids | 4.5  | 1.7  | 6.0  | 4.2  | 1.6  | 5.6  | 4.4  | 1.7  | 5.8  |
| Diet low in polyunsaturated fatty acids | 5.7  | 0.7  | 11.5 | 5.3  | 0.6  | 10.7 | 5.5  | 0.6  | 11.2 |
| Diet high in trans fatty acids          | 9.0  | 1.0  | 12.1 | 8.5  | 1.1  | 11.5 | 8.8  | 1.0  | 11.8 |

---

|                                          |      |      |      |      |      |      |      |      |      |
|------------------------------------------|------|------|------|------|------|------|------|------|------|
| Diet high in sodium                      | 7.9  | 1.1  | 19.0 | 5.3  | 0.4  | 15.0 | 6.9  | 0.9  | 17.4 |
| Low physical activity                    | 3.2  | 1.0  | 7.3  | 4.2  | 1.6  | 8.7  | 3.6  | 1.2  | 7.9  |
| All risk factors                         | 95.2 | 93.8 | 96.5 | 93.9 | 92.0 | 95.6 | 94.7 | 93.1 | 96.1 |
| Environmental/occupational risks         | 39.8 | 36.5 | 43.1 | 36.8 | 33.4 | 40.1 | 38.7 | 35.4 | 41.9 |
| Behavioral risks                         | 73.4 | 67.5 | 78.1 | 62.6 | 55.1 | 68.8 | 69.2 | 62.8 | 74.3 |
| Suboptimal temperature                   | 5.0  | 2.3  | 6.8  | 5.0  | 2.5  | 6.7  | 5.0  | 2.4  | 6.7  |
| Diet low in legumes                      | 14.7 | 3.3  | 23.5 | 13.6 | 3.0  | 22.0 | 14.3 | 3.2  | 22.9 |
| High temperature                         | 0.9  | -1.2 | 2.2  | 0.9  | -1.2 | 2.1  | 0.9  | -1.2 | 2.2  |
| Low temperature                          | 4.2  | 2.6  | 5.6  | 4.2  | 2.7  | 5.6  | 4.2  | 2.6  | 5.6  |
| Impaired kidney function                 | 11.8 | 8.3  | 15.6 | 12.6 | 8.8  | 16.7 | 12.1 | 8.5  | 16.0 |
| High LDL cholesterol                     | 46.9 | 39.4 | 55.0 | 45.2 | 37.2 | 53.6 | 46.2 | 38.6 | 54.3 |
| Particulate matter pollution             | 32.4 | 29.5 | 35.4 | 30.0 | 27.4 | 32.8 | 31.5 | 28.8 | 34.4 |
| <b>Low-income countries</b>              | 0.0  | 0.0  | 0.0  | 0.0  | 0.0  | 0.0  | 0.0  | 0.0  | 0.0  |
| Air pollution                            | 38.7 | 35.4 | 42.4 | 37.4 | 33.7 | 42.0 | 38.2 | 34.8 | 42.4 |
| Ambient particulate matter pollution     | 9.4  | 5.3  | 14.3 | 6.5  | 3.8  | 10.2 | 8.2  | 4.7  | 12.6 |
| Household air pollution from solid fuels | 29.4 | 23.1 | 35.7 | 30.8 | 25.1 | 37.4 | 30.0 | 24.1 | 36.3 |
| Other environmental risks                | 6.6  | 4.2  | 9.0  | 4.6  | 2.6  | 6.8  | 5.8  | 3.6  | 8.1  |

---

|                                        |      |      |      |      |      |      |      |      |      |
|----------------------------------------|------|------|------|------|------|------|------|------|------|
| Lead exposure                          | 6.6  | 4.2  | 9.0  | 4.6  | 2.6  | 6.8  | 5.8  | 3.6  | 8.1  |
| Tobacco                                | 24.9 | 23.1 | 26.7 | 11.0 | 9.6  | 12.5 | 19.0 | 17.7 | 20.5 |
| Smoking                                | 22.3 | 20.6 | 23.9 | 6.4  | 5.5  | 7.4  | 15.6 | 14.5 | 16.8 |
| Secondhand smoke                       | 3.6  | 2.8  | 4.4  | 5.0  | 4.0  | 6.2  | 4.2  | 3.3  | 5.1  |
| Alcohol use                            | -2.2 | -4.5 | 0.1  | -1.4 | -2.4 | -0.3 | -1.9 | -3.2 | -0.5 |
| Metabolic risks                        | 79.9 | 74.2 | 85.3 | 80.4 | 74.7 | 85.9 | 80.1 | 74.5 | 85.4 |
| High fasting plasma glucose            | 18.8 | 11.8 | 28.7 | 20.6 | 13.1 | 32.0 | 19.6 | 12.3 | 30.1 |
| High systolic blood pressure           | 53.9 | 47.0 | 60.5 | 52.0 | 44.3 | 59.5 | 53.1 | 46.1 | 60.0 |
| High body-mass index                   | 14.7 | 7.5  | 23.7 | 18.8 | 11.5 | 27.4 | 16.4 | 9.2  | 25.1 |
| Dietary risks                          | 58.5 | 49.2 | 66.2 | 55.4 | 46.2 | 63.4 | 57.2 | 48.1 | 65.1 |
| Diet low in fruits                     | 7.2  | 2.9  | 10.5 | 6.8  | 2.9  | 9.9  | 7.0  | 2.9  | 10.2 |
| Diet low in vegetables                 | 10.0 | 6.4  | 13.6 | 9.4  | 6.0  | 12.7 | 9.8  | 6.2  | 13.3 |
| Diet low in whole grains               | 19.0 | 7.2  | 24.7 | 17.4 | 6.6  | 23.0 | 18.4 | 6.9  | 24.0 |
| Diet low in nuts and seeds             | 6.3  | 3.2  | 8.6  | 5.3  | 2.8  | 7.4  | 5.9  | 3.0  | 8.0  |
| Diet high in red meat                  | 3.0  | 0.2  | 5.7  | 2.7  | 0.2  | 5.2  | 2.8  | 0.2  | 5.5  |
| Diet high in processed meat            | 1.4  | 0.2  | 4.0  | 1.4  | 0.2  | 3.8  | 1.4  | 0.2  | 3.9  |
| Diet high in sugar-sweetened beverages | 2.4  | 1.9  | 2.9  | 2.1  | 1.6  | 2.6  | 2.3  | 1.8  | 2.7  |

---

|                                         |      |      |      |      |      |      |      |      |      |
|-----------------------------------------|------|------|------|------|------|------|------|------|------|
| Diet low in fiber                       | 4.3  | 1.8  | 7.3  | 4.2  | 1.7  | 7.0  | 4.3  | 1.7  | 7.2  |
| Diet low in seafood omega-3 fatty acids | 4.6  | 1.4  | 6.2  | 4.3  | 1.3  | 5.8  | 4.5  | 1.4  | 6.0  |
| Diet low in polyunsaturated fatty acids | 5.5  | 0.7  | 10.9 | 5.2  | 0.7  | 10.5 | 5.4  | 0.7  | 10.8 |
| Diet high in trans fatty acids          | 5.9  | 0.8  | 8.9  | 5.9  | 1.0  | 9.0  | 5.9  | 0.8  | 8.9  |
| Diet high in sodium                     | 7.0  | 0.9  | 19.3 | 6.5  | 0.6  | 18.4 | 6.8  | 0.8  | 18.9 |
| Low physical activity                   | 2.5  | 0.7  | 6.3  | 3.6  | 1.2  | 8.2  | 2.9  | 0.9  | 7.1  |
| All risk factors                        | 93.3 | 91.5 | 94.9 | 92.5 | 90.4 | 94.4 | 93.0 | 91.1 | 94.7 |
| Environmental/occupational risks        | 45.8 | 42.2 | 49.6 | 43.4 | 39.6 | 48.0 | 44.8 | 41.2 | 48.9 |
| Behavioral risks                        | 68.0 | 61.0 | 73.7 | 60.7 | 52.8 | 67.6 | 64.9 | 57.7 | 71.1 |
| Suboptimal temperature                  | 5.2  | 3.0  | 6.9  | 5.3  | 3.0  | 7.0  | 5.3  | 3.0  | 6.9  |
| Diet low in legumes                     | 13.8 | 3.3  | 22.1 | 12.5 | 3.1  | 20.1 | 13.2 | 3.2  | 21.3 |
| High temperature                        | 0.6  | -1.2 | 1.4  | 0.7  | -1.3 | 1.5  | 0.6  | -1.2 | 1.5  |
| Low temperature                         | 4.6  | 3.2  | 6.1  | 4.6  | 3.2  | 6.1  | 4.6  | 3.2  | 6.1  |
| Impaired kidney function                | 8.6  | 6.1  | 11.3 | 10.4 | 7.4  | 13.6 | 9.4  | 6.7  | 12.2 |
| High LDL cholesterol                    | 42.9 | 35.7 | 51.0 | 43.0 | 35.5 | 51.5 | 43.0 | 35.7 | 51.1 |
| Particulate matter pollution            | 38.7 | 35.4 | 42.4 | 37.4 | 33.7 | 42.0 | 38.2 | 34.8 | 42.4 |

\* PAF: population attributable fraction; § IHD: ischemic heart disease; † DALY: disability adjusted life years; ¶ LMIC: low- and middle-income countries

**Table S24. Risk-attributable IHD\* deaths with percentage change by age and sex in LMICs§ from 2000 to 2019**

|                               | males  |             |             | females |             |             | both    |             |             |
|-------------------------------|--------|-------------|-------------|---------|-------------|-------------|---------|-------------|-------------|
|                               | value  | lower limit | upper limit | value   | lower limit | upper limit | value   | lower limit | upper limit |
| <b>2000</b>                   |        |             |             |         |             |             |         |             |             |
| <b>Upper-middle Countries</b> |        |             |             |         |             |             |         |             |             |
| 15-49 years                   | 147616 | 140975      | 154686      | 57644   | 53551       | 62034       | 205260  | 196719      | 214048      |
| 50-69 years                   | 479196 | 460469      | 498641      | 237666  | 227499      | 248987      | 716862  | 694522      | 740292      |
| >70 years                     | 584759 | 550133      | 616379      | 756227  | 686690      | 807002      | 1340986 | 1241048     | 1416258     |
| <b>Lower-middle Countries</b> |        |             |             |         |             |             |         |             |             |
| 15-49 years                   | 174425 | 162570      | 187161      | 74956   | 68106       | 83583       | 249381  | 235272      | 266778      |
| 50-69 years                   | 486981 | 459318      | 516700      | 267667  | 246207      | 292058      | 754648  | 715642      | 796274      |
| >70 years                     | 449393 | 416992      | 480479      | 483106  | 438407      | 525172      | 932499  | 869443      | 992322      |
| <b>Low-income Countries</b>   |        |             |             |         |             |             |         |             |             |
| 15-49 years                   | 13204  | 11545       | 15146       | 7651    | 6323        | 9446        | 20855   | 18141       | 24271       |
| 50-69 years                   | 45706  | 40146       | 51298       | 29124   | 25026       | 34270       | 74831   | 65950       | 84728       |
| >70 years                     | 40722  | 35746       | 45210       | 42365   | 35909       | 49302       | 83087   | 72607       | 93336       |
| <b>2019</b>                   |        |             |             |         |             |             |         |             |             |

**Upper-middle Countries**

|             |         |        |         |         |         |         |         |         |         |
|-------------|---------|--------|---------|---------|---------|---------|---------|---------|---------|
| 15-49 years | 133433  | 116705 | 150725  | 39373   | 34342   | 45097   | 172806  | 155116  | 191009  |
| 50-69 years | 601920  | 533385 | 674607  | 287882  | 254371  | 324148  | 889802  | 809779  | 971068  |
| >70 years   | 1087649 | 959404 | 1196328 | 1266524 | 1076247 | 1418385 | 2354173 | 2090659 | 2571832 |

**Lower-middle Countries**

|             |        |        |        |        |        |        |         |         |         |
|-------------|--------|--------|--------|--------|--------|--------|---------|---------|---------|
| 15-49 years | 243428 | 214735 | 276812 | 102144 | 87021  | 116883 | 345572  | 309892  | 382985  |
| 50-69 years | 790452 | 701281 | 889082 | 440452 | 381557 | 495270 | 1230905 | 1111314 | 1353197 |
| >70 years   | 799366 | 713786 | 885837 | 811574 | 704294 | 906745 | 1610941 | 1449401 | 1753870 |

**Low-income Countries**

|             |       |       |       |       |       |       |        |        |        |
|-------------|-------|-------|-------|-------|-------|-------|--------|--------|--------|
| 15-49 years | 21449 | 17099 | 26572 | 11369 | 9158  | 13972 | 32818  | 26362  | 39908  |
| 50-69 years | 65981 | 54270 | 78444 | 43461 | 36397 | 51408 | 109441 | 91281  | 128963 |
| >70 years   | 65023 | 55037 | 74563 | 77322 | 64166 | 89813 | 142345 | 120964 | 163403 |

---

\* IHD: ischemic heart disease

§ LMICs: low- and middle-income countries

**Table S25. Risk-attributable IHD\* DALY<sup>‡</sup> with percentage change by age and sex in LMICs<sup>§</sup> from 2000 to 2019**

|              | males    |             |             | females  |             |             | both     |             |             |
|--------------|----------|-------------|-------------|----------|-------------|-------------|----------|-------------|-------------|
|              | value    | lower limit | upper limit | value    | lower limit | upper limit | value    | lower limit | upper limit |
| <b>2000</b>  |          |             |             |          |             |             |          |             |             |
| Upper-middle |          |             |             |          |             |             |          |             |             |
| 15-49 years  | 7091450  | 6757196     | 7430854     | 2857853  | 2652419     | 3081504     | 9949303  | 9519740     | 10392553    |
| 50-69 years  | 14170729 | 13615385    | 14740575    | 6873486  | 6553640     | 7198561     | 21044214 | 20321597    | 21827850    |
| >70 years    | 8681200  | 8215161     | 9148065     | 10005777 | 9242486     | 10645755    | 18686977 | 17559136    | 19651351    |
| Lower-middle |          |             |             |          |             |             |          |             |             |
| 15-49 years  | 8414185  | 7853599     | 9042017     | 3684589  | 3349555     | 4109111     | 12098773 | 11398111    | 12956095    |
| 50-69 years  | 14349052 | 13517655    | 15220910    | 7680976  | 7076297     | 8358561     | 22030028 | 20883044    | 23250026    |
| >70 years    | 6807283  | 6357669     | 7249789     | 6718428  | 6143723     | 7260493     | 13525711 | 12682766    | 14380025    |
| Low-income   |          |             |             |          |             |             |          |             |             |
| 15-49 years  | 637199   | 556863      | 729349      | 371516   | 308283      | 461689      | 1008715  | 878870      | 1172607     |
| 50-69 years  | 1357440  | 1195496     | 1525518     | 848602   | 724734      | 994668      | 2206042  | 1946070     | 2497595     |
| >70 years    | 624463   | 551752      | 691696      | 611995   | 523555      | 710241      | 1236458  | 1089916     | 1379118     |



**2019**

Upper-middle

|             |          |          |          |          |          |          |          |          |          |
|-------------|----------|----------|----------|----------|----------|----------|----------|----------|----------|
| 15-49 years | 6452912  | 5672093  | 7282418  | 1967584  | 1720754  | 2236205  | 8420495  | 7568173  | 9306468  |
| 50-69 years | 17944643 | 15926281 | 20059280 | 8479845  | 7525346  | 9486375  | 26424488 | 24034804 | 28829259 |
| >70 years   | 14640043 | 13035756 | 16139959 | 15122536 | 13150393 | 16875440 | 29762579 | 26650602 | 32327928 |

Lower-middle

|             |          |          |          |          |          |          |          |          |          |
|-------------|----------|----------|----------|----------|----------|----------|----------|----------|----------|
| 15-49 years | 11705050 | 10332717 | 13278114 | 4955622  | 4233535  | 5671655  | 16660672 | 14952516 | 18463198 |
| 50-69 years | 23481135 | 20774046 | 26417491 | 12817715 | 11109266 | 14383380 | 36298849 | 32716809 | 39978735 |
| >70 years   | 11425926 | 10238870 | 12630486 | 10858476 | 9511484  | 12090164 | 22284402 | 20203145 | 24228641 |

Low-income

|             |         |         |         |         |         |         |         |         |         |
|-------------|---------|---------|---------|---------|---------|---------|---------|---------|---------|
| 15-49 years | 1031591 | 823748  | 1272864 | 543810  | 439536  | 670191  | 1575400 | 1262791 | 1913585 |
| 50-69 years | 1985236 | 1640498 | 2357276 | 1275675 | 1070100 | 1502712 | 3260912 | 2730119 | 3829612 |
| >70 years   | 960606  | 823534  | 1099127 | 1055016 | 888215  | 1228241 | 2015623 | 1738930 | 2307015 |

---

\* IHD: ischemic heart disease

§ LMICs: low- and middle-income countries

<sup>9</sup>DALY: disability adjusted years

**Figure S1. Simplified flowchart for the estimation of risk-attributable IHD burden.**

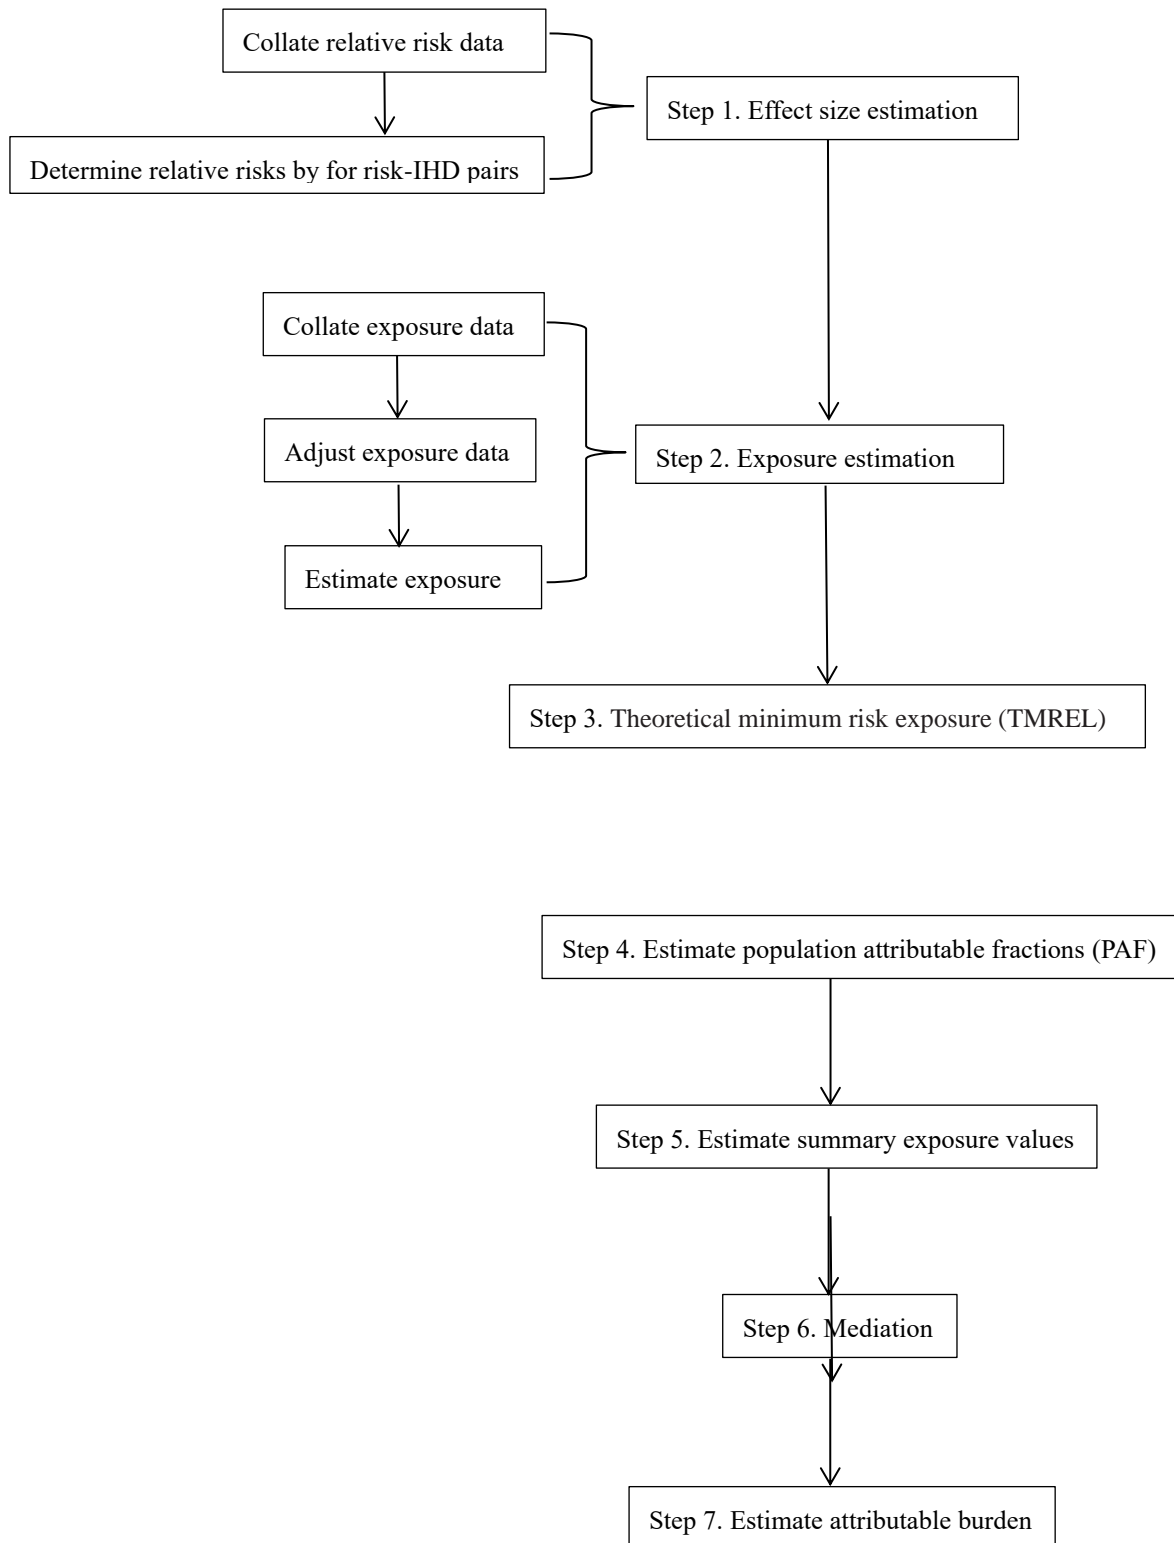

Supplement: JAH3-10-e021024-s001.pdf [file JAH3-10-e021024-s001.pdf]
